# Supplementary material for: Enhanced electronic coupling in tetraaryl molecular junctions with osmium(iv) centers
Source: Royal Society of Chemistry journal article supplement (doi:10.1039/d6sc03527b), 2026-06-11
Supplement: d6sc03527b1.pdf [file d6sc03527b1.pdf]

**Contents:**

*Geometry Filename /// Total Energy (Ha, unless otherwise stated)*

- 1\_QChem\_GeometricAnalysis\_Os-Fc.xyz /// N/A (X-ray crystal structure)
- 2\_QChem\_GeometricAnalysis\_Si-Fc.xyz /// N/A (X-ray crystal structure)
- 3\_QChem\_GeometricAnalysis\_C-Fc.xyz /// N/A (X-ray crystal structure)
- 4\_QChem\_GeometricAnalysis\_Os(C8H9)4.xyz /// -1330.54727722953
- 5\_QChem\_GeometricAnalysis\_Si(C8H9)4\_fromOs(C8H9)4.xyz /// -1528.84600659461
- 6\_QChem\_GeometricAnalysis\_Si(C6H5)4.xyz /// -1214.75456183905
- 7\_QChem\_GeometricAnalysis\_Si(C8H9)4\_fromSi(C6H5)4.xyz /// -1528.84625655137
- 8\_QChem\_GeometricAnalysis\_C(C6H5)4.xyz /// -963.448312892631
- 9\_QChem\_Model\_PBE\_Os1h\_sim.xyz /// -2205.07520348555
- 10\_QChem\_Model\_PBE\_Os1h\_diff.xyz /// -2205.07424659267
- 11\_QChem\_Model\_PBE\_Si1h\_sim.xyz /// -2089.28123404691
- 12\_QChem\_Model\_PBE\_Si1h\_diff.xyz /// -2089.28140433495
- 13\_QChem\_Model\_PBE\_C1h\_sim.xyz /// -1837.97255055652
- 14\_QChem\_Model\_PBE\_C1h\_diff.xyz /// -1837.97297496680
- 15\_QChem\_Model\_PBE\_Os1h-Au1\_sim.xyz /// -2475.96019868150
- 16\_QChem\_Model\_PBE\_Os1h-Au1\_diff.xyz /// -2475.96036319345
- 17\_QChem\_Model\_PBE\_Si1h-Au1\_sim.xyz /// -2360.15678980524
- 18\_QChem\_Model\_PBE\_Si1h-Au1\_diff.xyz /// -2360.18110871945
- 19\_QChem\_Model\_PBE\_C1h-Au1\_sim.xyz /// -2108.85135941170
- 20\_QChem\_Model\_PBE\_C1h-Au1\_diff.xyz /// -2108.84970336778
- 21\_QChem\_Model\_B3LYP\_Os1h\_sim.xyz /// -2207.18078397311
- 22\_QChem\_Model\_B3LYP\_Os1h\_diff.xyz /// -2207.17995773226
- 23\_QChem\_Model\_B3LYP\_Si1h\_sim.xyz /// -2091.13741268375
- 24\_QChem\_Model\_B3LYP\_Si1h\_diff.xyz /// -2091.13746426853

25\_QChem\_Model\_B3LYP\_C1h\_sim.xyz /// -1839.70375063244  
26\_QChem\_Model\_B3LYP\_C1h\_diff.xyz /// -1839.70392246166  
27\_QChem\_Model\_B3LYP\_Os1h-Au1\_sim.xyz /// -2478.06722984796  
28\_QChem\_Model\_B3LYP\_Os1h-Au1\_diff.xyz /// -2478.06795840824  
29\_QChem\_Model\_B3LYP\_Si1h-Au1\_sim.xyz /// -2362.01801287426  
30\_QChem\_Model\_B3LYP\_Si1h-Au1\_diff.xyz /// -2362.01893203589  
31\_QChem\_Model\_B3LYP\_C1h-Au1\_sim.xyz /// -2110.58746744725  
32\_QChem\_Model\_B3LYP\_C1h-Au1\_diff.xyz /// -2110.58604061701

33\_FHI-aims\_Molecule\_Os1.xyz /// -566287.731908578 eV  
34\_FHI-aims\_Molecule\_Os2.xyz /// -591429.938924243 eV  
35\_FHI-aims\_Molecule\_Os3.xyz /// -616572.512776929 eV  
36\_FHI-aims\_Molecule\_Si1.xyz /// -80899.498231165 eV  
37\_FHI-aims\_Molecule\_Si2.xyz /// -106041.994090932 eV  
38\_FHI-aims\_Molecule\_Si3.xyz /// -131184.575636874 eV  
39\_FHI-aims\_Molecule\_C1.xyz /// -74034.593620248 eV  
40\_FHI-aims\_Molecule\_C2.xyz /// -99177.166157066 eV  
41\_FHI-aims\_Molecule\_C3.xyz /// -124319.725560289 eV  
42\_FHI-aims\_Junction\_Os1.xyz /// -40204528.015414119 eV  
43\_FHI-aims\_Junction\_Os2.xyz /// -40229669.999601454 eV  
44\_FHI-aims\_Junction\_Os3.xyz /// -40254812.585844547 eV  
45\_FHI-aims\_Junction\_Si1.xyz /// -39719139.529123940 eV  
46\_FHI-aims\_Junction\_Si2.xyz /// -39744281.998911940 eV  
47\_FHI-aims\_Junction\_Si3.xyz /// -39769424.579884693 eV  
48\_FHI-aims\_Junction\_C1.xyz /// -39712274.560149595 eV  
49\_FHI-aims\_Junction\_C2.xyz /// -39737417.143819436 eV  
50\_FHI-aims\_Junction\_C3.xyz /// -39762559.745518416 eV

51\_FHI-aims\_Junction\_Si2\_-2SMe.xyz /// -39720501.768030971 eV  
52\_FHI-aims\_Junction\_Si2\_-2Ph2SMe.xyz /// -39697497.094350062 eV  
53\_FHI-aims\_Junction\_Si2\_diMe.xyz /// -39752952.856112286 eV  
54\_FHI-aims\_Junction\_Os1h\_sim.xyz /// -40180631.634713791 eV  
55\_FHI-aims\_Junction\_Os1h\_diff.xyz /// -40180631.655162871 eV  
56\_FHI-aims\_Junction\_Si1h\_sim.xyz /// -39695243.291097976 eV  
57\_FHI-aims\_Junction\_Si1h\_diff.xyz /// -39695243.277062997 eV  
58\_FHI-aims\_Junction\_C1h\_sim.xyz /// -39688378.423698835 eV  
59\_FHI-aims\_Junction\_C1h\_diff.xyz /// -39688378.434473053 eV  
60\_FHI-aims\_Junction\_Si2\_-2PhSMe\_diff.xyz /// -39707929.758849718 eV

**XYZ Files:**

**1\_QChem\_GeometricAnalysis\_Os-Fc.xyz /// N/A (X-ray crystal structure)**

145

C72H68Fe4Os

|    |           |          |          |
|----|-----------|----------|----------|
| Os | 8.841250  | 8.841250 | 8.593200 |
| Fe | 6.830750  | 2.923625 | 4.113651 |
| C  | 8.777593  | 7.159644 | 7.506160 |
| C  | 7.918224  | 6.137596 | 7.911759 |
| H  | 7.376220  | 6.287738 | 8.677620 |
| C  | 7.805056  | 4.913967 | 7.263832 |
| C  | 8.570708  | 4.698240 | 6.103750 |
| C  | 9.438919  | 5.725593 | 5.685261 |
| H  | 9.965857  | 5.575292 | 4.908934 |
| C  | 10.503405 | 7.983649 | 5.786661 |
| H  | 11.074638 | 8.322233 | 6.507175 |
| H  | 9.980993  | 8.721911 | 5.409325 |
| H  | 11.061111 | 7.586128 | 5.086255 |
| C  | 9.573306  | 6.943918 | 6.334048 |
| C  | 6.880261  | 3.898991 | 7.865356 |
| H  | 6.273751  | 4.341390 | 8.494224 |
| H  | 7.404582  | 3.219630 | 8.339469 |
| H  | 6.358645  | 3.470261 | 7.154449 |
| C  | 8.464613  | 3.494062 | 5.249586 |
| C  | 8.020782  | 2.176716 | 5.583861 |
| H  | 7.708085  | 1.884106 | 6.487350 |

|    |           |           |          |
|----|-----------|-----------|----------|
| C  | 8.070293  | 1.359784  | 4.432373 |
| H  | 7.820351  | 0.393294  | 4.387112 |
| C  | 8.553025  | 2.148424  | 3.353926 |
| H  | 8.696130  | 1.838114  | 2.414096 |
| C  | 8.782898  | 3.464002  | 3.849754 |
| H  | 9.103375  | 4.241784  | 3.309499 |
| C  | 4.984697  | 2.118364  | 3.657266 |
| H  | 4.757618  | 1.145578  | 3.605569 |
| C  | 4.913967  | 2.938832  | 4.807895 |
| H  | 4.623903  | 2.637822  | 5.716386 |
| C  | 5.350725  | 4.268556  | 4.467605 |
| H  | 5.396840  | 5.055303  | 5.084201 |
| C  | 5.677851  | 4.259714  | 3.093552 |
| H  | 6.009681  | 5.038063  | 2.560636 |
| C  | 5.462124  | 2.924685  | 2.600302 |
| H  | 5.631682  | 2.617470  | 1.664391 |
| Fe | 10.851750 | 14.758875 | 4.113651 |
| C  | 8.904907  | 10.522856 | 7.506160 |
| C  | 9.764277  | 11.544904 | 7.911759 |
| H  | 10.306280 | 11.394762 | 8.677620 |
| C  | 9.877445  | 12.768533 | 7.263832 |
| C  | 9.111792  | 12.984260 | 6.103750 |
| C  | 8.243581  | 11.956907 | 5.685261 |
| H  | 7.716643  | 12.107208 | 4.908934 |
| C  | 7.179095  | 9.698851  | 5.786661 |
| H  | 6.607862  | 9.360267  | 6.507175 |
| H  | 7.701507  | 8.960589  | 5.409325 |
| H  | 6.621389  | 10.096372 | 5.086255 |
| C  | 8.109195  | 10.738582 | 6.334048 |
| C  | 10.802239 | 13.783509 | 7.865356 |
| H  | 11.408749 | 13.341110 | 8.494224 |
| H  | 10.277918 | 14.462870 | 8.339469 |
| H  | 11.323855 | 14.212239 | 7.154449 |
| C  | 9.217887  | 14.188438 | 5.249586 |
| C  | 9.661718  | 15.505784 | 5.583861 |
| H  | 9.974415  | 15.798394 | 6.487350 |
| C  | 9.612207  | 16.322716 | 4.432373 |
| H  | 9.862149  | 17.289206 | 4.387112 |
| C  | 9.129475  | 15.534076 | 3.353926 |
| H  | 8.986370  | 15.844386 | 2.414096 |
| C  | 8.899602  | 14.218498 | 3.849754 |
| H  | 8.579125  | 13.440716 | 3.309499 |
| C  | 12.697803 | 15.564137 | 3.657266 |
| H  | 12.924882 | 16.536922 | 3.605569 |
| C  | 12.768533 | 14.743669 | 4.807895 |
| H  | 13.058597 | 15.044678 | 5.716386 |

|    |           |           |           |
|----|-----------|-----------|-----------|
| C  | 12.331776 | 13.413944 | 4.467605  |
| H  | 12.285660 | 12.627197 | 5.084201  |
| C  | 12.004649 | 13.422786 | 3.093552  |
| H  | 11.672819 | 12.644437 | 2.560636  |
| C  | 12.220376 | 14.757815 | 2.600302  |
| H  | 12.050818 | 15.065030 | 1.664391  |
| Fe | 2.923625  | 10.851750 | 13.072749 |
| C  | 7.159644  | 8.904907  | 9.680240  |
| C  | 6.137596  | 9.764277  | 9.274641  |
| H  | 6.287738  | 10.306280 | 8.508780  |
| C  | 4.913967  | 9.877445  | 9.922568  |
| C  | 4.698240  | 9.111792  | 11.082650 |
| C  | 5.725594  | 8.243581  | 11.501139 |
| H  | 5.575292  | 7.716643  | 12.277466 |
| C  | 7.983649  | 7.179095  | 11.399739 |
| H  | 8.322233  | 6.607862  | 10.679225 |
| H  | 8.721911  | 7.701507  | 11.777075 |
| H  | 7.586128  | 6.621389  | 12.100145 |
| C  | 6.943918  | 8.109195  | 10.852352 |
| C  | 3.898991  | 10.802239 | 9.321044  |
| H  | 4.341390  | 11.408749 | 8.692176  |
| H  | 3.219630  | 10.277918 | 8.846931  |
| H  | 3.470261  | 11.323855 | 10.031951 |
| C  | 3.494062  | 9.217887  | 11.936814 |
| C  | 2.176716  | 9.661718  | 11.602539 |
| H  | 1.884106  | 9.974415  | 10.699050 |
| C  | 1.359784  | 9.612207  | 12.754027 |
| H  | 0.393294  | 9.862149  | 12.799288 |
| C  | 2.148424  | 9.129475  | 13.832474 |
| H  | 1.838114  | 8.986370  | 14.772304 |
| C  | 3.464002  | 8.899602  | 13.336646 |
| H  | 4.241784  | 8.579125  | 13.876901 |
| C  | 2.118364  | 12.697803 | 13.529134 |
| H  | 1.145578  | 12.924882 | 13.580831 |
| C  | 2.938832  | 12.768533 | 12.378505 |
| H  | 2.637822  | 13.058597 | 11.470014 |
| C  | 4.268556  | 12.331776 | 12.718795 |
| H  | 5.055303  | 12.285660 | 12.102199 |
| C  | 4.259714  | 12.004649 | 14.092848 |
| H  | 5.038063  | 11.672819 | 14.625764 |
| C  | 2.924686  | 12.220376 | 14.586098 |
| H  | 2.617470  | 12.050818 | 15.522009 |
| Fe | 14.758875 | 6.830750  | 13.072749 |
| C  | 10.522856 | 8.777593  | 9.680240  |
| C  | 11.544904 | 7.918224  | 9.274641  |
| H  | 11.394762 | 7.376220  | 8.508780  |

|   |           |           |           |
|---|-----------|-----------|-----------|
| C | 12.768533 | 7.805056  | 9.922568  |
| C | 12.984260 | 8.570708  | 11.082650 |
| C | 11.956907 | 9.438919  | 11.501139 |
| H | 12.107208 | 9.965857  | 12.277466 |
| C | 9.698851  | 10.503405 | 11.399739 |
| H | 9.360267  | 11.074638 | 10.679225 |
| H | 8.960589  | 9.980993  | 11.777075 |
| H | 10.096372 | 11.061111 | 12.100145 |
| C | 10.738582 | 9.573306  | 10.852352 |
| C | 13.783509 | 6.880261  | 9.321044  |
| H | 13.341110 | 6.273751  | 8.692176  |
| H | 14.462870 | 7.404582  | 8.846931  |
| H | 14.212239 | 6.358645  | 10.031951 |
| C | 14.188438 | 8.464613  | 11.936814 |
| C | 15.505784 | 8.020782  | 11.602539 |
| H | 15.798394 | 7.708085  | 10.699050 |
| C | 16.322716 | 8.070293  | 12.754027 |
| H | 17.289206 | 7.820351  | 12.799288 |
| C | 15.534076 | 8.553025  | 13.832474 |
| H | 15.844386 | 8.696130  | 14.772304 |
| C | 14.218498 | 8.782898  | 13.336646 |
| H | 13.440716 | 9.103375  | 13.876901 |
| C | 15.564137 | 4.984697  | 13.529134 |
| H | 16.536922 | 4.757618  | 13.580831 |
| C | 14.743669 | 4.913967  | 12.378505 |
| H | 15.044678 | 4.623903  | 11.470014 |
| C | 13.413944 | 5.350725  | 12.718795 |
| H | 12.627197 | 5.396840  | 12.102199 |
| C | 13.422786 | 5.677851  | 14.092848 |
| H | 12.644437 | 6.009681  | 14.625764 |
| C | 14.757815 | 5.462124  | 14.586098 |
| H | 15.065030 | 5.631682  | 15.522009 |

## 2\_QChem\_GeometricAnalysis\_Si-Fc.xyz /// N/A (X-ray crystal structure)

121

C64H52Fe4Si

|    |           |           |           |
|----|-----------|-----------|-----------|
| Fe | 17.414371 | 13.862741 | 11.958914 |
| Fe | 9.311354  | 12.098934 | 2.888569  |
| Si | 11.118300 | 16.677450 | 8.507311  |
| C  | 10.299771 | 15.405516 | 7.396645  |
| C  | 12.457833 | 15.944087 | 9.602195  |
| C  | 9.017386  | 13.572331 | 5.630532  |
| C  | 14.470690 | 14.933211 | 11.330088 |
| C  | 8.439234  | 12.621494 | 4.671605  |
| C  | 13.789360 | 16.361913 | 9.493619  |

|   |           |           |           |
|---|-----------|-----------|-----------|
| H | 14.023868 | 16.993921 | 8.824158  |
| C | 12.169424 | 14.999254 | 10.592686 |
| H | 11.275402 | 14.694546 | 10.694549 |
| C | 14.775776 | 15.874931 | 10.340547 |
| H | 15.668865 | 16.184776 | 10.247355 |
| C | 13.156507 | 14.494038 | 11.432008 |
| H | 12.929560 | 13.840460 | 12.082949 |
| C | 9.555289  | 13.156062 | 6.843879  |
| H | 9.491426  | 12.240737 | 7.089895  |
| C | 9.694935  | 15.815782 | 6.200411  |
| H | 9.707321  | 16.739223 | 5.977498  |
| C | 15.493796 | 14.492482 | 12.300043 |
| C | 10.183473 | 14.047305 | 7.704498  |
| H | 10.543239 | 13.725363 | 8.522770  |
| C | 9.086319  | 14.939882 | 5.338651  |
| H | 8.705807  | 15.265871 | 4.531579  |
| C | 8.694288  | 11.216586 | 4.617032  |
| H | 9.237795  | 10.726580 | 5.222869  |
| C | 16.431513 | 15.347701 | 12.958342 |
| H | 16.527308 | 16.281550 | 12.812630 |
| C | 17.716789 | 13.786914 | 9.935147  |
| H | 17.067391 | 13.957514 | 9.263081  |
| C | 7.587350  | 12.935030 | 3.560369  |
| H | 7.263252  | 13.798989 | 3.334109  |
| C | 17.998304 | 12.540331 | 10.509971 |
| H | 17.572718 | 11.719711 | 10.290785 |
| C | 19.024301 | 12.708662 | 11.472700 |
| H | 19.399966 | 12.025331 | 12.015255 |
| C | 7.309170  | 11.721357 | 2.849778  |
| H | 6.760727  | 11.637680 | 2.078701  |
| C | 18.572675 | 14.751538 | 10.532789 |
| H | 18.597936 | 15.680739 | 10.336212 |
| C | 19.386980 | 14.065761 | 11.483159 |
| H | 20.058347 | 14.459016 | 12.027767 |
| C | 7.993835  | 10.674457 | 3.498760  |
| H | 7.989855  | 9.761556  | 3.235821  |
| C | 17.196897 | 14.567197 | 13.867069 |
| H | 17.890545 | 14.888782 | 14.430864 |
| C | 16.747051 | 13.232111 | 13.786445 |
| H | 17.087626 | 12.497614 | 14.283612 |
| C | 15.680806 | 13.177187 | 12.818202 |
| H | 15.190111 | 12.402730 | 12.569371 |
| C | 11.320653 | 11.865450 | 2.694425  |
| H | 11.903119 | 11.477955 | 3.336961  |
| C | 10.989328 | 13.208540 | 2.618365  |
| H | 11.304776 | 13.892805 | 3.197277  |

|    |           |           |           |
|----|-----------|-----------|-----------|
| C  | 10.673568 | 11.176115 | 1.690434  |
| H  | 10.722333 | 10.242867 | 1.524318  |
| C  | 10.102087 | 13.390881 | 1.534510  |
| H  | 9.705898  | 14.208076 | 1.253963  |
| C  | 9.924195  | 12.123394 | 0.956454  |
| H  | 9.388515  | 11.933227 | 0.195455  |
| C  | 11.936829 | 17.949384 | 7.396645  |
| C  | 9.778767  | 17.410813 | 9.602195  |
| C  | 13.219214 | 19.782569 | 5.630532  |
| C  | 7.765910  | 18.421689 | 11.330088 |
| C  | 13.797366 | 20.733406 | 4.671605  |
| C  | 8.447240  | 16.992987 | 9.493619  |
| H  | 8.212732  | 16.360979 | 8.824158  |
| C  | 10.067176 | 18.355646 | 10.592686 |
| H  | 10.961198 | 18.660354 | 10.694549 |
| C  | 7.460824  | 17.479969 | 10.340547 |
| H  | 6.567735  | 17.170124 | 10.247355 |
| C  | 9.080093  | 18.860862 | 11.432008 |
| H  | 9.307040  | 19.514440 | 12.082949 |
| C  | 12.681311 | 20.198838 | 6.843879  |
| H  | 12.745174 | 21.114163 | 7.089895  |
| C  | 12.541665 | 17.539118 | 6.200411  |
| H  | 12.529279 | 16.615677 | 5.977498  |
| C  | 6.742804  | 18.862418 | 12.300043 |
| C  | 12.053127 | 19.307595 | 7.704498  |
| H  | 11.693361 | 19.629537 | 8.522770  |
| C  | 13.150281 | 18.415018 | 5.338651  |
| H  | 13.530793 | 18.089029 | 4.531579  |
| C  | 13.542312 | 22.138314 | 4.617032  |
| H  | 12.998805 | 22.628320 | 5.222869  |
| C  | 5.805087  | 18.007199 | 12.958342 |
| H  | 5.709292  | 17.073350 | 12.812630 |
| C  | 14.649250 | 20.419870 | 3.560369  |
| H  | 14.973348 | 19.555911 | 3.334109  |
| C  | 14.927430 | 21.633543 | 2.849778  |
| H  | 15.475873 | 21.717220 | 2.078701  |
| C  | 14.242765 | 22.680443 | 3.498760  |
| H  | 14.246745 | 23.593344 | 3.235821  |
| C  | 5.039703  | 18.787703 | 13.867069 |
| H  | 4.346055  | 18.466118 | 14.430864 |
| C  | 5.489549  | 20.122789 | 13.786445 |
| H  | 5.148974  | 20.857286 | 14.283612 |
| C  | 6.555794  | 20.177713 | 12.818202 |
| H  | 7.046489  | 20.952170 | 12.569371 |
| Fe | 4.822229  | 19.492159 | 11.958914 |
| Fe | 12.925246 | 21.255966 | 2.888569  |

|   |           |           |           |
|---|-----------|-----------|-----------|
| C | 4.519811  | 19.567986 | 9.935147  |
| H | 5.169209  | 19.397386 | 9.263081  |
| C | 4.238296  | 20.814569 | 10.509971 |
| H | 4.663882  | 21.635189 | 10.290785 |
| C | 3.212299  | 20.646238 | 11.472700 |
| H | 2.836634  | 21.329569 | 12.015255 |
| C | 3.663925  | 18.603362 | 10.532789 |
| H | 3.638664  | 17.674161 | 10.336212 |
| C | 2.849620  | 19.289139 | 11.483159 |
| H | 2.178253  | 18.895884 | 12.027767 |
| C | 10.915947 | 21.489450 | 2.694425  |
| H | 10.333481 | 21.876945 | 3.336961  |
| C | 11.247272 | 20.146360 | 2.618365  |
| H | 10.931824 | 19.462095 | 3.197277  |
| C | 11.563032 | 22.178785 | 1.690434  |
| H | 11.514267 | 23.112033 | 1.524318  |
| C | 12.134513 | 19.964019 | 1.534510  |
| H | 12.530702 | 19.146824 | 1.253963  |
| C | 12.312405 | 21.231506 | 0.956454  |
| H | 12.848085 | 21.421673 | 0.195455  |

### 3\_QChem\_GeometricAnalysis\_C-Fc.xyz /// N/A (X-ray crystal structure)

121

C65H52Fe4

|    |           |           |           |
|----|-----------|-----------|-----------|
| Fe | 4.742234  | 2.915510  | 7.273278  |
| C  | 4.130600  | 2.355269  | 9.144271  |
| H  | 4.481903  | 1.580422  | 9.669822  |
| Fe | 14.506786 | 0.869031  | 13.073046 |
| C  | 2.877981  | 3.628774  | 7.696947  |
| H  | 2.191750  | 3.910728  | 7.026449  |
| Fe | 9.919323  | 12.607667 | 11.516683 |
| C  | 3.036255  | 2.319987  | 8.227373  |
| H  | 2.481252  | 1.519632  | 8.000431  |
| C  | 4.635136  | 3.674025  | 9.172202  |
| H  | 5.409016  | 3.992938  | 9.719346  |
| Fe | 15.808878 | 7.657967  | 3.476101  |
| C  | 3.864742  | 4.466702  | 8.281624  |
| H  | 3.996685  | 5.440332  | 8.095102  |
| C  | 4.846728  | 2.713479  | 5.247723  |
| H  | 4.092106  | 2.842755  | 4.604337  |
| C  | 5.207250  | 1.493365  | 5.876177  |
| H  | 4.744997  | 0.614562  | 5.758275  |
| C  | 6.332535  | 1.739894  | 6.718412  |
| H  | 6.793787  | 1.065452  | 7.294938  |
| C  | 5.751471  | 3.721454  | 5.691401  |

|   |           |           |           |
|---|-----------|-----------|-----------|
| H | 5.736921  | 4.682776  | 5.416506  |
| C | 6.681818  | 3.124390  | 6.598764  |
| C | 7.791847  | 3.822817  | 7.272875  |
| C | 8.592044  | 3.203449  | 8.225627  |
| H | 8.411612  | 2.303376  | 8.469985  |
| C | 9.654104  | 3.874939  | 8.830581  |
| H | 10.179500 | 3.426261  | 9.482561  |
| C | 9.159726  | 5.807587  | 7.523719  |
| H | 9.352821  | 6.701030  | 7.264872  |
| C | 9.957069  | 5.189624  | 8.495674  |
| C | 8.100038  | 5.148808  | 6.933403  |
| H | 7.570774  | 5.600611  | 6.286740  |
| C | 11.176591 | 5.962772  | 9.042617  |
| C | 10.759073 | 7.211162  | 9.856115  |
| C | 11.762475 | 7.916609  | 10.530763 |
| H | 12.661409 | 7.615384  | 10.470845 |
| C | 11.476452 | 9.040350  | 11.281819 |
| H | 12.183647 | 9.506308  | 11.712270 |
| C | 10.166405 | 9.503527  | 11.419193 |
| C | 9.164541  | 8.790254  | 10.763613 |
| H | 8.262698  | 9.077959  | 10.843043 |
| C | 9.453604  | 7.667596  | 9.996040  |
| H | 8.747582  | 7.204904  | 9.560285  |
| C | 9.863833  | 10.699201 | 12.231751 |
| C | 8.594752  | 11.329082 | 12.394102 |
| H | 7.731122  | 11.017520 | 11.998015 |
| C | 8.772468  | 12.491323 | 13.203571 |
| H | 8.055227  | 13.135009 | 13.470543 |
| C | 10.140514 | 12.582903 | 13.551504 |
| H | 10.558898 | 13.302414 | 14.105765 |
| C | 10.819034 | 11.489275 | 12.955547 |
| H | 11.799252 | 11.303312 | 13.022945 |
| C | 10.969245 | 14.190838 | 10.770596 |
| H | 11.598552 | 14.773520 | 11.285418 |
| C | 9.585840  | 14.404499 | 10.610797 |
| H | 9.059338  | 15.166343 | 10.988567 |
| C | 9.068781  | 13.337046 | 9.813816  |
| H | 8.114328  | 13.220090 | 9.539538  |
| C | 10.128598 | 12.474853 | 9.490189  |
| H | 10.060454 | 11.638380 | 8.946469  |
| C | 11.315265 | 12.995340 | 10.074463 |
| H | 12.228531 | 12.591523 | 10.014128 |
| C | 12.005124 | 5.096111  | 10.016586 |
| C | 11.464316 | 4.812745  | 11.279402 |
| H | 10.592069 | 5.125150  | 11.489518 |
| C | 12.167212 | 4.090479  | 12.227051 |

|   |           |           |           |
|---|-----------|-----------|-----------|
| H | 11.764769 | 3.909552  | 13.068373 |
| C | 13.466243 | 3.619231  | 11.968150 |
| C | 14.005524 | 3.913618  | 10.716614 |
| H | 14.883491 | 3.615720  | 10.509371 |
| C | 13.289290 | 4.634177  | 9.760639  |
| H | 13.688289 | 4.812567  | 8.917208  |
| C | 14.234012 | 2.899433  | 12.997310 |
| C | 13.718346 | 2.360034  | 14.222257 |
| H | 12.768241 | 2.417701  | 14.528776 |
| C | 14.774954 | 1.708155  | 14.918525 |
| H | 14.699776 | 1.236954  | 15.797340 |
| C | 15.956051 | 1.843348  | 14.137255 |
| H | 16.857233 | 1.477659  | 14.370119 |
| C | 15.630153 | 2.571717  | 12.954741 |
| H | 16.263998 | 2.804800  | 12.217235 |
| C | 15.317571 | -0.851343 | 12.339313 |
| H | 16.278811 | -1.120246 | 12.401044 |
| C | 14.726700 | -0.080571 | 11.288533 |
| H | 15.198373 | 0.278610  | 10.483226 |
| C | 13.344920 | 0.076180  | 11.592152 |
| H | 12.673065 | 0.571498  | 11.041382 |
| C | 13.088821 | -0.601649 | 12.823276 |
| H | 12.207580 | -0.654659 | 13.293005 |
| C | 14.307450 | -1.167440 | 13.272460 |
| H | 14.434118 | -1.687153 | 14.117341 |
| C | 11.994918 | 6.369174  | 7.789066  |
| C | 12.272549 | 5.398780  | 6.818455  |
| H | 12.016017 | 4.497851  | 6.976535  |
| C | 12.912864 | 5.722189  | 5.632047  |
| H | 13.095254 | 5.038501  | 4.998195  |
| C | 13.294610 | 7.037247  | 5.353271  |
| C | 13.050062 | 7.992114  | 6.332611  |
| H | 13.324975 | 8.889346  | 6.184253  |
| C | 12.411429 | 7.665404  | 7.527345  |
| H | 12.258429 | 8.343718  | 8.174652  |
| C | 13.852126 | 7.419732  | 4.047887  |
| C | 14.191216 | 6.544705  | 2.966355  |
| H | 14.140476 | 5.546134  | 2.985800  |
| C | 14.619198 | 7.337419  | 1.854476  |
| H | 14.916443 | 6.992592  | 0.964126  |
| C | 14.552683 | 8.703416  | 2.245245  |
| H | 14.807056 | 9.487036  | 1.678535  |
| C | 14.088131 | 8.763453  | 3.587289  |
| H | 13.962139 | 9.596621  | 4.125732  |
| C | 17.035777 | 6.876141  | 4.910668  |
| H | 16.745943 | 6.335737  | 5.700613  |

|   |           |          |          |
|---|-----------|----------|----------|
| C | 17.165186 | 8.290270 | 4.869308 |
| H | 16.981728 | 8.919463 | 5.624674 |
| C | 17.584448 | 8.654360 | 3.565804 |
| H | 17.754115 | 9.584653 | 3.240753 |
| C | 17.724941 | 7.461366 | 2.801453 |
| H | 18.006335 | 7.408933 | 1.843303 |
| C | 17.384779 | 6.362928 | 3.627575 |
| H | 17.384627 | 5.399968 | 3.357729 |

#### 4\_QChem\_GeometricAnalysis\_Os(C8H9)4.xyz /// -1330.54727722953

69

|   |          |          |          |
|---|----------|----------|----------|
| C | 1.47888  | -0.30396 | 1.30683  |
| C | 1.88752  | 0.69201  | 2.24800  |
| C | 2.93995  | 0.37978  | 3.12374  |
| H | 3.26477  | 1.14113  | 3.84301  |
| C | 3.57155  | -0.87235 | 3.11796  |
| H | 4.38537  | -1.07215 | 3.82380  |
| C | 3.16125  | -1.87456 | 2.22333  |
| C | 2.11303  | -1.57198 | 1.33273  |
| H | 1.77549  | -2.34768 | 0.63686  |
| C | 1.18784  | 2.02788  | 2.36271  |
| H | 0.20866  | 1.91339  | 2.85775  |
| H | 0.99017  | 2.48015  | 1.37638  |
| H | 1.78703  | 2.74026  | 2.95249  |
| C | 3.84048  | -3.22445 | 2.19244  |
| H | 4.14707  | -3.54472 | 3.20149  |
| H | 4.75245  | -3.19914 | 1.56897  |
| H | 3.18020  | -4.00009 | 1.77306  |
| C | 0.49370  | 1.45746  | -1.30452 |
| C | -0.35172 | 1.86163  | -2.38785 |
| C | 0.13554  | 2.83681  | -3.27149 |
| H | -0.50198 | 3.14987  | -4.10681 |
| C | 1.40862  | 3.41119  | -3.12970 |
| H | 1.74669  | 4.16411  | -3.85028 |
| C | 2.25529  | 3.01854  | -2.08294 |
| C | 1.77911  | 2.04070  | -1.18573 |
| H | 2.43412  | 1.70959  | -0.37250 |
| C | -1.72354 | 1.26879  | -2.61814 |
| H | -1.69248 | 0.16751  | -2.59696 |
| H | -2.12751 | 1.58108  | -3.59415 |
| H | -2.44505 | 1.57936  | -1.84266 |
| C | 3.62984  | 3.62093  | -1.90394 |
| H | 3.66233  | 4.29834  | -1.03216 |
| H | 3.93147  | 4.20424  | -2.78815 |

|    |          |          |          |
|----|----------|----------|----------|
| H  | 4.39288  | 2.84307  | -1.73324 |
| C  | -0.34680 | -1.60660 | -1.13525 |
| C  | 0.63689  | -2.16286 | -2.01075 |
| C  | 0.29694  | -3.31662 | -2.73657 |
| H  | 1.05275  | -3.76226 | -3.39430 |
| C  | -0.97174 | -3.90756 | -2.65124 |
| H  | -1.19024 | -4.81059 | -3.23212 |
| C  | -1.96691 | -3.34699 | -1.83277 |
| C  | -1.63316 | -2.20160 | -1.08547 |
| H  | -2.39823 | -1.75067 | -0.44516 |
| C  | 1.99129  | -1.52258 | -2.21768 |
| H  | 2.39752  | -1.09787 | -1.28543 |
| H  | 1.92465  | -0.69024 | -2.93970 |
| H  | 2.72082  | -2.24967 | -2.60983 |
| C  | -3.35803 | -3.93513 | -1.76948 |
| H  | -3.33370 | -5.03612 | -1.82004 |
| H  | -3.97833 | -3.58595 | -2.61456 |
| H  | -3.87777 | -3.64669 | -0.84198 |
| C  | -1.61125 | 0.48932  | 1.11017  |
| C  | -2.14558 | -0.37821 | 2.11573  |
| C  | -3.26771 | 0.06264  | 2.83724  |
| H  | -3.68650 | -0.59856 | 3.60498  |
| C  | -3.85995 | 1.31411  | 2.61439  |
| H  | -4.73564 | 1.61347  | 3.20098  |
| C  | -3.33016 | 2.19144  | 1.65459  |
| C  | -2.21189 | 1.75905  | 0.91558  |
| H  | -1.78972 | 2.44189  | 0.17054  |
| C  | -1.54762 | -1.73172 | 2.42618  |
| H  | -1.90643 | -2.10766 | 3.39760  |
| H  | -0.44780 | -1.68285 | 2.46534  |
| H  | -1.80635 | -2.48564 | 1.66186  |
| C  | -3.91478 | 3.56846  | 1.43857  |
| H  | -3.50075 | 4.29651  | 2.15929  |
| H  | -5.00897 | 3.56812  | 1.57208  |
| H  | -3.69315 | 3.94876  | 0.42851  |
| Os | -0.00808 | 0.01470  | -0.00356 |

**5\_QChem\_GeometricAnalysis\_Si(C8H9)4\_fromOs(C8H9)4.xyz ///** -1528.84600659461

69

|   |         |          |          |
|---|---------|----------|----------|
| C | 1.34452 | 0.55927  | -1.23046 |
| C | 1.80878 | -0.27061 | -2.29221 |
| C | 2.78435 | 0.24086  | -3.17027 |
| H | 3.14483 | -0.39535 | -3.98701 |
| C | 3.29476 | 1.53653  | -3.03546 |

|   |          |          |          |
|---|----------|----------|----------|
| H | 4.05064  | 1.89900  | -3.74163 |
| C | 2.83951  | 2.37934  | -2.00788 |
| C | 1.86673  | 1.86837  | -1.12939 |
| H | 1.48760  | 2.53079  | -0.34194 |
| C | 1.25723  | -1.65620 | -2.55455 |
| H | 0.29459  | -1.60442 | -3.09307 |
| H | 1.06777  | -2.21815 | -1.62740 |
| H | 1.95328  | -2.24503 | -3.17342 |
| C | 3.39121  | 3.77525  | -1.83243 |
| H | 3.63953  | 4.23780  | -2.80156 |
| H | 4.31784  | 3.76723  | -1.23026 |
| H | 2.67289  | 4.43035  | -1.31406 |
| C | 0.69541  | -1.35325 | 1.15788  |
| C | -0.00920 | -1.84292 | 2.29741  |
| C | 0.59335  | -2.84224 | 3.08454  |
| H | 0.05273  | -3.22331 | 3.95857  |
| C | 1.86458  | -3.34951 | 2.78898  |
| H | 2.30160  | -4.12757 | 3.42510  |
| C | 2.58862  | -2.86359 | 1.68909  |
| C | 1.98363  | -1.86920 | 0.89708  |
| H | 2.55223  | -1.47454 | 0.04656  |
| C | -1.35159 | -1.29157 | 2.73022  |
| H | -1.23253 | -0.32362 | 3.24761  |
| H | -1.85290 | -1.98304 | 3.42647  |
| H | -2.03134 | -1.11048 | 1.88194  |
| C | 3.96057  | -3.39729 | 1.34688  |
| H | 3.92853  | -4.04915 | 0.45566  |
| H | 4.38136  | -3.99028 | 2.17433  |
| H | 4.66623  | -2.58063 | 1.11996  |
| C | -0.55669 | 1.48632  | 1.08209  |
| C | 0.27439  | 2.07901  | 2.07638  |
| C | -0.22738 | 3.17073  | 2.81223  |
| H | 0.41608  | 3.63800  | 3.56667  |
| C | -1.51902 | 3.66798  | 2.60903  |
| H | -1.87280 | 4.52224  | 3.19750  |
| C | -2.36897 | 3.07808  | 1.65810  |
| C | -1.86336 | 1.99754  | 0.91307  |
| H | -2.52526 | 1.52969  | 0.17469  |
| C | 1.65424  | 1.55458  | 2.41370  |
| H | 2.22411  | 1.24933  | 1.52226  |
| H | 1.58902  | 0.66385  | 3.06337  |
| H | 2.24343  | 2.31598  | 2.94952  |
| C | -3.78345 | 3.57139  | 1.45979  |
| H | -3.85016 | 4.66598  | 1.57248  |
| H | -4.47050 | 3.12780  | 2.20297  |
| H | -4.16770 | 3.30619  | 0.46215  |

|    |          |          |          |
|----|----------|----------|----------|
| C  | -1.48177 | -0.67796 | -0.98645 |
| C  | -2.08548 | 0.02589  | -2.06765 |
| C  | -3.16786 | -0.57498 | -2.74121 |
| H  | -3.64298 | -0.03151 | -3.56637 |
| C  | -3.64431 | -1.84284 | -2.39287 |
| H  | -4.48849 | -2.27486 | -2.94248 |
| C  | -3.04317 | -2.56996 | -1.35040 |
| C  | -1.97142 | -1.96593 | -0.67099 |
| H  | -1.48850 | -2.53415 | 0.13272  |
| C  | -1.57806 | 1.36551  | -2.55799 |
| H  | -2.32864 | 1.86022  | -3.19534 |
| H  | -0.65779 | 1.24426  | -3.15558 |
| H  | -1.32472 | 2.05052  | -1.73290 |
| C  | -3.53074 | -3.95094 | -0.97720 |
| H  | -3.41285 | -4.66106 | -1.81447 |
| H  | -4.60227 | -3.94374 | -0.71242 |
| H  | -2.97350 | -4.35311 | -0.11675 |
| Si | -0.00105 | 0.00612  | 0.00934  |

**6\_QChem\_GeometricAnalysis\_Si(C6H5)4.xyz ///** -1214.75456183905

45

|    |          |          |          |
|----|----------|----------|----------|
| C  | -0.05820 | -1.54363 | 1.10019  |
| C  | 0.68354  | -1.61027 | 2.30315  |
| C  | 0.68965  | -2.77132 | 3.09042  |
| C  | -0.05167 | -3.89285 | 2.69118  |
| C  | -0.79886 | -3.84619 | 1.50514  |
| C  | -0.80175 | -2.68387 | 0.72078  |
| Si | 0.00000  | 0.00000  | 0.00000  |
| C  | -1.54363 | 0.05820  | -1.10019 |
| C  | 0.05820  | 1.54363  | 1.10019  |
| C  | 1.54363  | -0.05820 | -1.10019 |
| C  | -1.61027 | -0.68354 | -2.30315 |
| C  | -2.68387 | 0.80175  | -0.72078 |
| C  | -0.68354 | 1.61027  | 2.30315  |
| C  | 0.80175  | 2.68387  | 0.72078  |
| C  | 1.61027  | 0.68354  | -2.30315 |
| C  | 2.68387  | -0.80175 | -0.72078 |
| C  | -2.77132 | -0.68965 | -3.09042 |
| C  | -3.84619 | 0.79886  | -1.50514 |
| C  | -0.68965 | 2.77132  | 3.09042  |
| C  | 0.79886  | 3.84619  | 1.50514  |
| C  | 2.77132  | 0.68965  | -3.09042 |
| C  | 3.84619  | -0.79886 | -1.50514 |
| C  | -3.89285 | 0.05167  | -2.69118 |

|   |          |          |          |
|---|----------|----------|----------|
| C | 0.05167  | 3.89285  | 2.69118  |
| C | 3.89285  | -0.05167 | -2.69118 |
| H | 1.25667  | -0.73781 | 2.63711  |
| H | 1.27074  | -2.79842 | 4.01790  |
| H | -0.05121 | -4.79930 | 3.30488  |
| H | -1.38488 | -4.71657 | 1.19250  |
| H | -1.39778 | -2.65966 | -0.19815 |
| H | -0.73781 | -1.25667 | -2.63711 |
| H | -2.65966 | 1.39778  | 0.19815  |
| H | -1.25667 | 0.73781  | 2.63711  |
| H | 1.39778  | 2.65966  | -0.19815 |
| H | 0.73781  | 1.25667  | -2.63711 |
| H | 2.65966  | -1.39778 | 0.19815  |
| H | -2.79842 | -1.27074 | -4.01790 |
| H | -4.71657 | 1.38488  | -1.19250 |
| H | -1.27074 | 2.79842  | 4.01790  |
| H | 1.38488  | 4.71657  | 1.19250  |
| H | 2.79842  | 1.27074  | -4.01790 |
| H | 4.71657  | -1.38488 | -1.19250 |
| H | -4.79930 | 0.05121  | -3.30488 |
| H | 0.05121  | 4.79930  | 3.30488  |
| H | 4.79930  | -0.05121 | -3.30488 |

7\_QChem\_GeometricAnalysis\_Si(C8H9)4\_fromSi(C6H5)4.xyz /// -1528.84625655137

69

|    |          |          |          |
|----|----------|----------|----------|
| C  | -1.51827 | 0.26940  | -1.12163 |
| C  | -1.52474 | 1.20593  | -2.19476 |
| C  | -2.67809 | 1.29835  | -2.99932 |
| C  | -3.79812 | 0.48968  | -2.78319 |
| C  | -3.80725 | -0.45568 | -1.74221 |
| C  | -2.65971 | -0.54247 | -0.93481 |
| Si | 0.00000  | 0.00000  | 0.00827  |
| C  | -0.26982 | -1.52061 | 1.13492  |
| C  | 1.51827  | -0.26940 | -1.12163 |
| C  | 0.26982  | 1.52061  | 1.13492  |
| C  | -1.21210 | -1.53157 | 2.20629  |
| C  | 0.53832  | -2.66083 | 0.94249  |
| C  | 1.52474  | -1.20593 | -2.19476 |
| C  | 2.65971  | 0.54247  | -0.93481 |
| C  | 1.21210  | 1.53157  | 2.20629  |
| C  | -0.53832 | 2.66083  | 0.94249  |
| C  | -1.31314 | -2.68941 | 2.99926  |
| C  | 0.44226  | -3.81648 | 1.74169  |
| C  | 2.67809  | -1.29835 | -2.99932 |

|   |          |          |          |
|---|----------|----------|----------|
| C | 3.80725  | 0.45568  | -1.74221 |
| C | 1.31314  | 2.68941  | 2.99926  |
| C | -0.44226 | 3.81648  | 1.74169  |
| C | -0.50719 | -3.81284 | 2.77517  |
| C | 3.79812  | -0.48968 | -2.78319 |
| C | 0.50719  | 3.81284  | 2.77517  |
| C | -0.32579 | 2.06172  | -2.54695 |
| H | -2.68969 | 2.02110  | -3.82342 |
| H | -4.67367 | 0.59292  | -3.43476 |
| C | -5.00887 | -1.33820 | -1.49535 |
| H | -2.64850 | -1.28945 | -0.13245 |
| C | -2.06394 | -0.33064 | 2.56063  |
| H | 1.28749  | -2.64461 | 0.14185  |
| C | 0.32579  | -2.06172 | -2.54695 |
| H | 2.64850  | 1.28945  | -0.13245 |
| C | 2.06394  | 0.33064  | 2.56063  |
| H | -1.28749 | 2.64461  | 0.14185  |
| H | -2.03986 | -2.70645 | 3.81969  |
| C | 1.33209  | -5.01061 | 1.48433  |
| H | 2.68969  | -2.02110 | -3.82342 |
| C | 5.00887  | 1.33820  | -1.49535 |
| H | 2.03986  | 2.70645  | 3.81969  |
| C | -1.33209 | 5.01061  | 1.48433  |
| H | -0.61695 | -4.69599 | 3.41500  |
| H | 4.67367  | -0.59292 | -3.43476 |
| H | 0.61695  | 4.69599  | 3.41500  |
| H | 0.19130  | 2.45126  | -1.65601 |
| H | -0.62458 | 2.91868  | -3.17186 |
| H | 0.42142  | 1.47768  | -3.11187 |
| H | -4.80261 | -2.08788 | -0.71556 |
| H | -5.31149 | -1.87544 | -2.41046 |
| H | -5.88238 | -0.74758 | -1.16696 |
| H | -2.91644 | -0.62633 | 3.19294  |
| H | -2.46003 | 0.18298  | 1.67038  |
| H | -1.47506 | 0.41843  | 3.11792  |
| H | -0.19130 | -2.45126 | -1.65601 |
| H | 0.62458  | -2.91868 | -3.17186 |
| H | -0.42142 | -1.47768 | -3.11187 |
| H | 2.91644  | 0.62633  | 3.19294  |
| H | 2.46003  | -0.18298 | 1.67038  |
| H | 1.47506  | -0.41843 | 3.11792  |
| H | 1.12602  | -5.82720 | 2.19406  |
| H | 2.39958  | -4.74524 | 1.57647  |
| H | 1.18933  | -5.40734 | 0.46432  |
| H | 4.80261  | 2.08788  | -0.71556 |
| H | 5.31149  | 1.87544  | -2.41046 |

|   |          |         |          |
|---|----------|---------|----------|
| H | 5.88238  | 0.74758 | -1.16696 |
| H | -1.12602 | 5.82720 | 2.19406  |
| H | -2.39958 | 4.74524 | 1.57647  |
| H | -1.18933 | 5.40734 | 0.46432  |

**8\_QChem\_GeometricAnalysis\_C(C6H5)4.xyz ///** -963.448312892631

45

|   |          |          |          |
|---|----------|----------|----------|
| C | 1.22995  | 0.03583  | -0.94933 |
| C | 1.31293  | 1.07845  | -1.90042 |
| C | 2.37657  | 1.15651  | -2.80539 |
| C | 3.38080  | 0.17608  | -2.80013 |
| C | 3.29859  | -0.87725 | -1.88351 |
| C | 2.23535  | -0.94748 | -0.96742 |
| C | 0.00000  | 0.00000  | 0.00000  |
| H | 0.51996  | 1.83238  | -1.93619 |
| H | 2.41408  | 1.98032  | -3.52516 |
| H | 4.21101  | 0.22938  | -3.51105 |
| H | 4.06370  | -1.66017 | -1.87610 |
| H | 2.19460  | -1.78772 | -0.26999 |
| C | 0.03583  | -1.22995 | 0.94933  |
| C | -1.22995 | -0.03583 | -0.94933 |
| C | -0.03583 | 1.22995  | 0.94933  |
| C | 1.07845  | -1.31293 | 1.90042  |
| C | -0.94748 | -2.23535 | 0.96742  |
| C | -1.31293 | -1.07845 | -1.90042 |
| C | -2.23535 | 0.94748  | -0.96742 |
| C | -1.07845 | 1.31293  | 1.90042  |
| C | 0.94748  | 2.23535  | 0.96742  |
| C | 1.15651  | -2.37657 | 2.80539  |
| H | 1.83238  | -0.51996 | 1.93619  |
| C | -0.87725 | -3.29859 | 1.88351  |
| H | -1.78772 | -2.19460 | 0.26999  |
| C | -2.37657 | -1.15651 | -2.80539 |
| H | -0.51996 | -1.83238 | -1.93619 |
| C | -3.29859 | 0.87725  | -1.88351 |
| H | -2.19460 | 1.78772  | -0.26999 |
| C | -1.15651 | 2.37657  | 2.80539  |
| H | -1.83238 | 0.51996  | 1.93619  |
| C | 0.87725  | 3.29859  | 1.88351  |
| H | 1.78772  | 2.19460  | 0.26999  |
| C | 0.17608  | -3.38080 | 2.80013  |
| H | 1.98032  | -2.41408 | 3.52516  |
| H | -1.66017 | -4.06370 | 1.87610  |
| C | -3.38080 | -0.17608 | -2.80013 |

|   |          |          |          |
|---|----------|----------|----------|
| H | -2.41408 | -1.98032 | -3.52516 |
| H | -4.06370 | 1.66017  | -1.87610 |
| C | -0.17608 | 3.38080  | 2.80013  |
| H | -1.98032 | 2.41408  | 3.52516  |
| H | 1.66017  | 4.06370  | 1.87610  |
| H | 0.22938  | -4.21101 | 3.51105  |
| H | -4.21101 | -0.22938 | -3.51105 |
| H | -0.22938 | 4.21101  | 3.51105  |

9\_QChem\_Model\_PBE\_Os1h\_sim.xyz /// -2205.07520348555

77

|   |          |          |          |
|---|----------|----------|----------|
| C | -0.09841 | 1.20210  | 2.02381  |
| C | 0.90611  | 2.04039  | 2.60357  |
| C | 0.76280  | 2.40960  | 3.95044  |
| H | 1.54160  | 3.03156  | 4.40774  |
| C | -0.34029 | 2.01285  | 4.72134  |
| H | -0.40892 | 2.32136  | 5.77033  |
| C | -1.35848 | 1.22775  | 4.15706  |
| C | -1.21694 | 0.83253  | 2.81195  |
| H | -1.99926 | 0.21198  | 2.36156  |
| C | 2.07766  | 2.57301  | 1.80702  |
| H | 1.78686  | 3.46309  | 1.22169  |
| H | 2.46552  | 1.83546  | 1.08525  |
| H | 2.90783  | 2.86748  | 2.47002  |
| C | -2.58176 | 0.83044  | 4.95087  |
| H | -2.38332 | 0.84830  | 6.03445  |
| H | -2.92731 | -0.18119 | 4.68250  |
| H | -3.42362 | 1.52022  | 4.76015  |
| C | 1.60297  | -0.64894 | -0.10325 |
| C | 1.90688  | -1.32302 | -1.32562 |
| C | 3.02474  | -2.17084 | -1.36859 |
| H | 3.23779  | -2.68142 | -2.31227 |
| C | 3.85338  | -2.38473 | -0.25013 |
| S | 5.28289  | -3.44894 | -0.27603 |
| C | 3.55141  | -1.74593 | 0.97924  |
| C | 2.43457  | -0.89703 | 1.01901  |
| H | 2.19572  | -0.41142 | 1.97059  |
| C | 1.06792  | -1.15849 | -2.57507 |
| H | -0.00516 | -1.09732 | -2.33140 |
| H | 1.21470  | -2.00508 | -3.26473 |
| H | 1.32565  | -0.23528 | -3.12370 |
| C | 4.39795  | -1.96800 | 2.20755  |
| H | 5.44826  | -1.67286 | 2.03193  |
| H | 4.41425  | -3.03293 | 2.50225  |

|    |          |          |          |
|----|----------|----------|----------|
| H  | 4.01831  | -1.38536 | 3.06078  |
| C  | -1.59189 | -0.55740 | -0.32341 |
| C  | -1.87253 | -1.80421 | 0.31675  |
| C  | -3.03869 | -2.49897 | -0.03944 |
| H  | -3.24070 | -3.44652 | 0.46827  |
| C  | -3.93058 | -2.02460 | -1.02082 |
| S  | -5.42133 | -2.87594 | -1.49726 |
| C  | -3.64866 | -0.80999 | -1.69542 |
| C  | -2.48564 | -0.11216 | -1.33154 |
| H  | -2.26939 | 0.82219  | -1.86072 |
| C  | -0.93302 | -2.41660 | 1.33142  |
| H  | -0.57837 | -1.67057 | 2.06204  |
| H  | -0.03425 | -2.82458 | 0.83934  |
| H  | -1.41862 | -3.23426 | 1.88814  |
| C  | -4.56576 | -0.27897 | -2.76846 |
| H  | -5.58294 | -0.09702 | -2.37674 |
| H  | -4.67141 | -0.99798 | -3.60069 |
| H  | -4.18705 | 0.66751  | -3.18355 |
| C  | 0.14253  | 2.20154  | -1.00267 |
| C  | -0.83043 | 3.24826  | -0.95828 |
| C  | -0.65545 | 4.34799  | -1.81353 |
| H  | -1.40800 | 5.14549  | -1.79980 |
| C  | 0.44746  | 4.46040  | -2.67280 |
| H  | 0.54024  | 5.33816  | -3.32197 |
| C  | 1.43644  | 3.46330  | -2.69769 |
| C  | 1.26297  | 2.34567  | -1.85858 |
| H  | 2.02921  | 1.56257  | -1.86495 |
| C  | -2.00264 | 3.22199  | -0.00322 |
| H  | -2.73554 | 4.00551  | -0.25388 |
| H  | -1.66807 | 3.38715  | 1.03520  |
| H  | -2.52419 | 2.25085  | -0.01329 |
| C  | 2.66133  | 3.59217  | -3.57397 |
| H  | 3.41421  | 4.25772  | -3.11458 |
| H  | 2.41137  | 4.01999  | -4.55892 |
| H  | 3.14462  | 2.61618  | -3.73926 |
| Os | 0.01536  | 0.55322  | 0.12857  |
| C  | -5.45741 | -4.33205 | -0.40395 |
| C  | 5.37878  | -3.99023 | -2.01230 |
| H  | -6.38437 | -4.86505 | -0.66144 |
| H  | -5.49704 | -4.04173 | 0.65715  |
| H  | -4.60164 | -5.00147 | -0.58236 |
| H  | 6.28443  | -4.61103 | -2.07641 |
| H  | 5.48424  | -3.13296 | -2.69472 |
| H  | 4.50888  | -4.60027 | -2.30023 |

10\_QChem\_Model\_PBE\_Os1h\_diff.xyz /// -2205.07424659267

|   |          |          |          |
|---|----------|----------|----------|
| C | 1.51716  | -0.70064 | 0.42909  |
| C | 2.85524  | -0.25755 | 0.65260  |
| C | 3.83640  | -1.20332 | 0.98715  |
| H | 4.85775  | -0.84071 | 1.14004  |
| C | 3.54250  | -2.57299 | 1.13691  |
| S | 4.76273  | -3.80030 | 1.56086  |
| C | 2.21269  | -3.02810 | 0.94908  |
| C | 1.23662  | -2.08105 | 0.60182  |
| H | 0.21020  | -2.43685 | 0.46088  |
| C | 3.23448  | 1.20622  | 0.58873  |
| H | 2.97606  | 1.72031  | 1.53059  |
| H | 2.69569  | 1.73563  | -0.21480 |
| H | 4.31567  | 1.33348  | 0.41719  |
| C | 1.84815  | -4.48329 | 1.10918  |
| H | 2.08036  | -4.84947 | 2.12557  |
| H | 2.41198  | -5.12263 | 0.40583  |
| H | 0.77446  | -4.64099 | 0.92660  |
| C | 0.31862  | 1.42085  | -1.85778 |
| C | -0.63661 | 2.31147  | -2.44558 |
| C | -0.34864 | 2.84271  | -3.71292 |
| H | -1.07691 | 3.52263  | -4.17077 |
| C | 0.82299  | 2.52130  | -4.41438 |
| C | 1.76136  | 1.63451  | -3.86342 |
| C | 1.48777  | 1.09577  | -2.59071 |
| H | 2.20537  | 0.38944  | -2.15961 |
| C | -1.93892 | 2.67198  | -1.76680 |
| H | -2.49014 | 1.76845  | -1.45746 |
| H | -2.58600 | 3.25344  | -2.44264 |
| H | -1.77942 | 3.27413  | -0.85526 |
| C | 3.03657  | 1.28228  | -4.59434 |
| H | 3.85004  | 1.98761  | -4.34541 |
| H | 2.89809  | 1.31911  | -5.68697 |
| H | 3.38980  | 0.27300  | -4.32820 |
| C | -1.67541 | -0.47986 | -0.24940 |
| C | -1.87154 | -1.48614 | -1.24397 |
| C | -3.09406 | -2.17484 | -1.27655 |
| H | -3.21964 | -2.95010 | -2.03791 |
| C | -4.14392 | -1.89002 | -0.38166 |
| S | -5.70563 | -2.74890 | -0.39143 |
| C | -3.98300 | -0.86602 | 0.58693  |
| C | -2.75500 | -0.18703 | 0.62301  |
| H | -2.63252 | 0.61110  | 1.36199  |
| C | -0.83031 | -1.78890 | -2.29917 |

|    |          |          |          |
|----|----------|----------|----------|
| H  | 0.19604  | -1.69639 | -1.90783 |
| H  | -0.91097 | -1.07879 | -3.14050 |
| H  | -0.95168 | -2.80708 | -2.70386 |
| C  | -5.08995 | -0.51821 | 1.54997  |
| H  | -5.36558 | -1.38406 | 2.17885  |
| H  | -6.00739 | -0.21094 | 1.01624  |
| H  | -4.79264 | 0.30467  | 2.21810  |
| C  | -0.04245 | 1.88347  | 1.41931  |
| C  | -0.21883 | 1.54215  | 2.79897  |
| C  | -0.23671 | 2.58832  | 3.73693  |
| H  | -0.38090 | 2.33695  | 4.79439  |
| C  | -0.07438 | 3.93252  | 3.37100  |
| H  | -0.10096 | 4.71146  | 4.14114  |
| C  | 0.13625  | 4.28333  | 2.02789  |
| C  | 0.14973  | 3.24651  | 1.07539  |
| H  | 0.32493  | 3.50677  | 0.02633  |
| C  | -0.37290 | 0.11667  | 3.28324  |
| H  | -0.30378 | 0.07055  | 4.38176  |
| H  | 0.40695  | -0.53941 | 2.86332  |
| H  | -1.34494 | -0.31940 | 2.99426  |
| C  | 0.36796  | 5.71886  | 1.61502  |
| H  | 1.42406  | 6.01255  | 1.75502  |
| H  | -0.24237 | 6.41330  | 2.21528  |
| H  | 0.12232  | 5.87837  | 0.55323  |
| Os | 0.03227  | 0.54591  | -0.07123 |
| C  | -5.54095 | -3.92295 | -1.77254 |
| H  | -6.50088 | -4.45817 | -1.81615 |
| H  | -4.73580 | -4.65273 | -1.59582 |
| H  | -5.37963 | -3.40336 | -2.72949 |
| C  | 6.29015  | -2.82865 | 1.75982  |
| H  | 0.99964  | 2.95579  | -5.40454 |
| H  | 7.06547  | -3.55573 | 2.04216  |
| H  | 6.19134  | -2.08232 | 2.56282  |
| H  | 6.58619  | -2.33898 | 0.81946  |

11\_QChem\_Model\_PBE\_Si1h\_sim.xyz /// -2089.28123404691

53

|    |         |          |          |
|----|---------|----------|----------|
| C  | 1.53648 | 0.37700  | -0.03734 |
| C  | 1.55720 | 1.57421  | -0.79412 |
| C  | 2.70217 | 2.37010  | -0.88095 |
| C  | 3.88252 | 1.99680  | -0.20128 |
| C  | 3.88075 | 0.81629  | 0.56623  |
| C  | 2.72368 | 0.02765  | 0.63994  |
| Si | 0.00001 | -0.72693 | -0.00000 |

|   |          |          |          |
|---|----------|----------|----------|
| C | 0.04590  | -1.83542 | 1.53929  |
| C | -1.53646 | 0.37699  | 0.03726  |
| C | -0.04589 | -1.83553 | -1.53921 |
| C | 0.80589  | -3.02875 | 1.54854  |
| C | -0.63272 | -1.47812 | 2.72596  |
| C | -1.55719 | 1.57423  | 0.79401  |
| C | -2.72367 | 0.02761  | -0.63999 |
| C | -0.80577 | -3.02893 | -1.54833 |
| C | 0.63260  | -1.47824 | -2.72596 |
| C | 0.89352  | -3.82664 | 2.69899  |
| C | -0.55004 | -2.27413 | 3.87772  |
| C | -2.70217 | 2.37010  | 0.88084  |
| C | -3.88075 | 0.81624  | -0.56628 |
| C | -0.89343 | -3.82689 | -2.69873 |
| C | 0.54990  | -2.27432 | -3.87767 |
| C | 0.21554  | -3.44919 | 3.86718  |
| C | -3.88252 | 1.99676  | 0.20121  |
| C | -0.21558 | -3.44945 | -3.86700 |
| H | 0.65404  | 1.90135  | -1.32170 |
| H | 2.68475  | 3.28987  | -1.47521 |
| S | 5.27943  | 3.08155  | -0.38376 |
| H | 4.77325  | 0.50359  | 1.11399  |
| H | 2.75174  | -0.88267 | 1.24913  |
| H | 1.32746  | -3.34790 | 0.63893  |
| H | -1.24023 | -0.56667 | 2.74751  |
| H | -0.65403 | 1.90140  | 1.32156  |
| H | -2.75173 | -0.88273 | -1.24915 |
| H | -1.32724 | -3.34807 | -0.63866 |
| H | 1.24003  | -0.56674 | -2.74761 |
| H | 1.48704  | -4.74652 | 2.68131  |
| H | -1.08796 | -1.97868 | 4.78439  |
| H | -2.68475 | 3.28989  | 1.47508  |
| H | -4.77326 | 0.50351  | -1.11402 |
| H | -1.48687 | -4.74683 | -2.68095 |
| H | 1.08772  | -1.97887 | -4.78440 |
| H | 0.27908  | -4.07175 | 4.76535  |
| S | -5.27945 | 3.08149  | 0.38370  |
| C | -6.58120 | 2.26532  | -0.59341 |
| H | -7.47311 | 2.89924  | -0.48278 |
| H | -6.80867 | 1.26075  | -0.20514 |
| H | -6.31568 | 2.21007  | -1.66031 |
| C | 6.58121  | 2.26533  | 0.59325  |
| H | -0.27913 | -4.07206 | -4.76513 |
| H | 7.47308  | 2.89934  | 0.48275  |
| H | 6.80877  | 1.26084  | 0.20482  |
| H | 6.31567  | 2.20988  | 1.66014  |

12\_QChem\_Model\_PBE\_Si1h\_diff.xyz /// -2089.28140433495

53

|    |          |          |          |
|----|----------|----------|----------|
| C  | -0.11511 | 1.97521  | 1.55779  |
| C  | 0.18923  | 1.44020  | 2.83183  |
| C  | 0.06574  | 2.21581  | 3.99392  |
| C  | -0.35831 | 3.54997  | 3.90549  |
| C  | -0.65538 | 4.10325  | 2.65164  |
| C  | -0.53448 | 3.32284  | 1.49274  |
| Si | -0.00836 | 0.89453  | 0.00206  |
| C  | 0.07818  | 1.99288  | -1.54208 |
| C  | 1.54443  | -0.18115 | 0.12558  |
| C  | -1.54605 | -0.20400 | -0.12796 |
| C  | -1.09313 | 2.57901  | -2.07700 |
| C  | 1.30854  | 2.28426  | -2.17266 |
| C  | 2.73251  | 0.30757  | 0.72135  |
| C  | 1.58179  | -1.48954 | -0.40064 |
| C  | -1.96446 | -0.73150 | -1.37400 |
| C  | -2.29636 | -0.57167 | 1.00867  |
| C  | -1.03685 | 3.42831  | -3.19165 |
| C  | 1.36927  | 3.13174  | -3.28840 |
| C  | 3.89532  | -0.46469 | 0.78244  |
| C  | 2.73932  | -2.27811 | -0.34724 |
| C  | -3.06206 | -1.58971 | -1.47718 |
| C  | -3.40214 | -1.42939 | 0.92260  |
| C  | 0.19644  | 3.70656  | -3.79914 |
| C  | 3.91153  | -1.77075 | 0.24557  |
| C  | -3.79336 | -1.95198 | -0.32487 |
| H  | 0.54353  | 0.40637  | 2.91564  |
| H  | 0.30718  | 1.78054  | 4.96915  |
| H  | -0.45105 | 4.15762  | 4.81125  |
| H  | -0.97826 | 5.14654  | 2.57504  |
| H  | -0.76222 | 3.77133  | 0.51957  |
| H  | -2.06590 | 2.35908  | -1.62260 |
| H  | 2.23152  | 1.83612  | -1.78844 |
| H  | 2.74651  | 1.31041  | 1.16267  |
| H  | 0.68151  | -1.91466 | -0.85866 |
| H  | -1.42797 | -0.45692 | -2.28926 |
| H  | -2.01981 | -0.17492 | 1.99196  |
| H  | -1.95667 | 3.86919  | -3.58943 |
| H  | 2.33365  | 3.34103  | -3.76259 |
| H  | 4.79723  | -0.05952 | 1.25333  |
| H  | 2.71536  | -3.28738 | -0.76549 |
| H  | -3.36050 | -1.98115 | -2.45548 |

|   |          |          |          |
|---|----------|----------|----------|
| H | -3.95442 | -1.68103 | 1.83137  |
| H | 0.24258  | 4.36639  | -4.67142 |
| S | 5.44133  | -2.67008 | 0.37851  |
| S | -5.16724 | -3.05360 | -0.57316 |
| C | 5.05735  | -4.27239 | -0.39478 |
| C | -5.81585 | -3.31212 | 1.10872  |
| H | 5.98428  | -4.86101 | -0.33025 |
| H | 4.78424  | -4.15650 | -1.45492 |
| H | 4.26044  | -4.80374 | 0.14793  |
| H | -6.65261 | -4.01686 | 0.99614  |
| H | -6.19589 | -2.37679 | 1.54746  |
| H | -5.05784 | -3.76184 | 1.76822  |

13\_QChem\_Model\_PBE\_C1h\_sim.xyz /// -1837.97255055652

53

|   |          |          |          |
|---|----------|----------|----------|
| C | 1.21844  | 0.00396  | -0.13934 |
| C | 1.48872  | 0.91933  | 0.89950  |
| C | 2.52933  | 1.85028  | 0.81713  |
| C | 3.33236  | 1.91511  | -0.33882 |
| C | 3.05642  | 1.02616  | -1.39554 |
| C | 2.02054  | 0.08985  | -1.29305 |
| C | 0.00006  | -0.94896 | -0.00000 |
| H | 0.85758  | 0.91560  | 1.79374  |
| H | 2.69825  | 2.53026  | 1.65522  |
| S | 4.68035  | 3.05448  | -0.57238 |
| H | 3.65367  | 1.06773  | -2.31232 |
| H | 1.83349  | -0.57624 | -2.13858 |
| C | -0.13342 | -1.90468 | -1.21896 |
| C | -1.21834 | 0.00392  | 0.13938  |
| C | 0.13358  | -1.90465 | 1.21896  |
| C | 0.91854  | -2.81084 | -1.48273 |
| C | -1.28402 | -1.98313 | -2.02368 |
| C | -1.48875 | 0.91922  | -0.89949 |
| C | -2.02036 | 0.08982  | 1.29314  |
| C | -0.91833 | -2.81088 | 1.48270  |
| C | 1.28416  | -1.98300 | 2.02371  |
| C | 0.83887  | -3.73154 | -2.53248 |
| H | 1.80564  | -2.80059 | -0.84192 |
| C | -1.37130 | -2.91561 | -3.07119 |
| H | -2.12888 | -1.31815 | -1.82966 |
| C | -2.52938 | 1.85015  | -0.81707 |
| H | -0.85770 | 0.91547  | -1.79379 |
| C | -3.05629 | 1.02608  | 1.39566  |
| H | -1.83324 | -0.57625 | 2.13867  |

|   |          |          |          |
|---|----------|----------|----------|
| C | -0.83862 | -3.73158 | 2.53246  |
| H | -1.80541 | -2.80071 | 0.84187  |
| C | 1.37149  | -2.91548 | 3.07122  |
| H | 2.12898  | -1.31796 | 1.82971  |
| C | -0.31029 | -3.78795 | -3.33696 |
| H | 1.67303  | -4.41632 | -2.71522 |
| H | -2.28180 | -2.95609 | -3.67758 |
| C | -3.33233 | 1.91500  | 0.33894  |
| H | -2.69838 | 2.53011  | -1.65516 |
| H | -3.65353 | 1.06758  | 2.31245  |
| C | 0.31053  | -3.78790 | 3.33697  |
| H | -1.67273 | -4.41642 | 2.71518  |
| H | 2.28197  | -2.95587 | 3.67763  |
| H | -0.37884 | -4.51192 | -4.15459 |
| S | -4.68025 | 3.05443  | 0.57264  |
| H | 0.37912  | -4.51185 | 4.15461  |
| C | 4.64567  | 4.06431  | 0.94215  |
| C | -4.64629 | 4.06365  | -0.94233 |
| H | 5.45275  | 4.80189  | 0.82274  |
| H | 4.84798  | 3.46017  | 1.83996  |
| H | 3.68912  | 4.59833  | 1.05006  |
| H | -5.45379 | 4.80081  | -0.82316 |
| H | -4.84832 | 3.45897  | -1.83984 |
| H | -3.69006 | 4.59818  | -1.05057 |

**14\_QChem\_Model\_PBE\_C1h\_diff.xyz ///** -1837.97297496680

53

|   |          |          |          |
|---|----------|----------|----------|
| C | -0.12501 | -1.48658 | 1.38281  |
| C | -1.27547 | -2.27758 | 1.60675  |
| C | -1.46162 | -2.97198 | 2.80694  |
| C | -0.50609 | -2.88069 | 3.83067  |
| C | 0.62858  | -2.08671 | 3.63246  |
| C | 0.81837  | -1.39848 | 2.42197  |
| C | 0.01596  | -0.74925 | 0.01985  |
| H | -2.03952 | -2.34095 | 0.82579  |
| H | -2.36191 | -3.57908 | 2.94541  |
| H | 1.37807  | -1.99162 | 4.42467  |
| H | 1.71112  | -0.77996 | 2.30146  |
| C | 1.20887  | 0.24524  | 0.04053  |
| C | -1.32946 | -0.00677 | -0.21549 |
| C | 0.30487  | -1.75654 | -1.13203 |
| C | 2.52375  | -0.26617 | 0.01869  |
| C | 1.06512  | 1.64512  | 0.05828  |
| C | -1.86335 | 0.78599  | 0.82313  |

|   |          |          |          |
|---|----------|----------|----------|
| C | -2.07977 | -0.09354 | -1.40304 |
| C | 0.65063  | -1.24768 | -2.40511 |
| C | 0.26707  | -3.15317 | -0.97442 |
| C | 3.64644  | 0.56913  | 0.03705  |
| H | 2.67255  | -1.34960 | -0.02312 |
| C | 2.17850  | 2.49350  | 0.06557  |
| H | 0.06771  | 2.08960  | 0.04841  |
| C | -3.06872 | 1.48364  | 0.68286  |
| H | -1.32855 | 0.84945  | 1.77596  |
| C | -3.29205 | 0.58983  | -1.55369 |
| H | -1.72656 | -0.71339 | -2.23035 |
| C | 0.91575  | -2.10013 | -3.48268 |
| H | 0.72100  | -0.16449 | -2.54456 |
| C | 0.54280  | -4.01130 | -2.05249 |
| H | 0.03038  | -3.58537 | 0.00061  |
| C | 3.48543  | 1.96845  | 0.06041  |
| H | 4.64216  | 0.11942  | 0.02397  |
| H | 2.02857  | 3.57806  | 0.06478  |
| C | -3.80221 | 1.39404  | -0.51592 |
| H | -3.43111 | 2.08446  | 1.52048  |
| H | -3.85095 | 0.49177  | -2.49020 |
| C | 0.86161  | -3.49212 | -3.31202 |
| H | 1.17437  | -1.67415 | -4.45731 |
| H | 0.51005  | -5.09427 | -1.89632 |
| S | 4.82622  | 3.13987  | 0.08213  |
| S | -5.35033 | 2.21730  | -0.82038 |
| H | 1.07469  | -4.16151 | -4.15105 |
| C | -5.66433 | 3.11198  | 0.73450  |
| H | -6.62432 | 3.62835  | 0.58854  |
| H | -4.88544 | 3.86361  | 0.93613  |
| H | -5.75847 | 2.42288  | 1.58777  |
| C | 6.30412  | 2.09200  | -0.10086 |
| H | -0.65154 | -3.41604 | 4.77391  |
| H | 7.15454  | 2.78793  | -0.14812 |
| H | 6.27040  | 1.50791  | -1.03334 |
| H | 6.44377  | 1.42293  | 0.76221  |

**15\_QChem\_Model\_PBE\_Os1h-Au1\_sim.xyz ///** -2475.96019868150

79

|   |          |          |         |
|---|----------|----------|---------|
| C | 0.19568  | -2.08819 | 1.74610 |
| C | -0.68747 | -3.16336 | 2.07482 |
| C | -0.47995 | -3.83334 | 3.29020 |
| H | -1.16273 | -4.64681 | 3.56255 |
| C | 0.57200  | -3.49771 | 4.15649 |

|   |          |          |          |
|---|----------|----------|----------|
| H | 0.69368  | -4.04540 | 5.09726  |
| C | 1.47814  | -2.47848 | 3.82370  |
| C | 1.27476  | -1.78917 | 2.61121  |
| H | 1.98011  | -1.00440 | 2.32162  |
| C | -1.77750 | -3.63389 | 1.13576  |
| H | -1.36033 | -4.29000 | 0.35169  |
| H | -2.27823 | -2.80317 | 0.61041  |
| H | -2.54812 | -4.20680 | 1.67590  |
| C | 2.65310  | -2.14447 | 4.71305  |
| H | 2.49185  | -2.50168 | 5.74240  |
| H | 2.83746  | -1.05875 | 4.75301  |
| H | 3.58064  | -2.61533 | 4.34177  |
| C | -1.66423 | 0.13698  | 0.21933  |
| C | -1.97451 | 1.21784  | -0.67454 |
| C | -3.19443 | 1.88616  | -0.51701 |
| H | -3.42700 | 2.68755  | -1.22496 |
| C | -4.10342 | 1.56889  | 0.51597  |
| S | -5.67786 | 2.34456  | 0.71004  |
| C | -3.79503 | 0.53333  | 1.43878  |
| C | -2.58134 | -0.14231 | 1.27054  |
| H | -2.33743 | -0.92729 | 1.99343  |
| C | -1.04005 | 1.66998  | -1.77682 |
| H | -0.07086 | 2.00201  | -1.36967 |
| H | -1.47986 | 2.50856  | -2.33880 |
| H | -0.82220 | 0.86277  | -2.49698 |
| C | -4.75149 | 0.14644  | 2.53787  |
| H | -5.72529 | -0.16961 | 2.11840  |
| H | -4.95434 | 0.99073  | 3.22068  |
| H | -4.34664 | -0.68518 | 3.13333  |
| C | 1.56249  | 0.15798  | -0.10589 |
| C | 1.87325  | 1.25661  | 0.76578  |
| C | 3.09092  | 1.92383  | 0.58928  |
| H | 3.32641  | 2.73885  | 1.28055  |
| C | 3.99447  | 1.58939  | -0.44362 |
| S | 5.56940  | 2.35852  | -0.65867 |
| C | 3.68020  | 0.54130  | -1.35039 |
| C | 2.46846  | -0.13300 | -1.16272 |
| H | 2.21036  | -0.92375 | -1.87432 |
| C | 0.93868  | 1.72606  | 1.86040  |
| H | 0.72691  | 0.93147  | 2.59607  |
| H | -0.03364 | 2.04256  | 1.44788  |
| H | 1.37309  | 2.57902  | 2.40467  |
| C | 4.62785  | 0.14174  | -2.45261 |
| H | 5.60564  | -0.16755 | -2.03713 |
| H | 4.82394  | 0.97760  | -3.14758 |
| H | 4.21965  | -0.69812 | -3.03408 |

|    |          |          |          |
|----|----------|----------|----------|
| C  | -0.24356 | -2.16794 | -1.55158 |
| C  | 0.63662  | -3.25683 | -1.84471 |
| C  | 0.40631  | -3.97834 | -3.02861 |
| H  | 1.08116  | -4.80809 | -3.26995 |
| C  | -0.65105 | -3.67824 | -3.89948 |
| H  | -0.78561 | -4.27080 | -4.81092 |
| C  | -1.54652 | -2.63797 | -3.60423 |
| C  | -1.32723 | -1.90116 | -2.42427 |
| H  | -2.03345 | -1.10555 | -2.16756 |
| C  | 1.76705  | -3.68208 | -0.93039 |
| H  | 2.33239  | -4.51402 | -1.37856 |
| H  | 1.38880  | -4.02003 | 0.04916  |
| H  | 2.48254  | -2.86656 | -0.72748 |
| C  | -2.72770 | -2.33581 | -4.49687 |
| H  | -3.55191 | -3.05033 | -4.32376 |
| H  | -2.45580 | -2.40758 | -5.56277 |
| H  | -3.12588 | -1.32605 | -4.31107 |
| Os | -0.04065 | -1.00253 | 0.07349  |
| C  | 5.60875  | 3.64968  | 0.62805  |
| C  | -5.70062 | 3.62473  | -0.58797 |
| H  | 6.60950  | 4.09756  | 0.55033  |
| H  | 5.49479  | 3.20623  | 1.62679  |
| H  | 4.83584  | 4.40728  | 0.43122  |
| H  | -6.69850 | 4.08051  | -0.51986 |
| H  | -5.58437 | 3.17202  | -1.58224 |
| H  | -4.92329 | 4.37833  | -0.39313 |
| Au | -7.58968 | 0.83365  | -0.32664 |
| Au | 7.48637  | 0.84776  | 0.37082  |

16\_QChem\_Model\_PBE\_Os1h-Au1\_diff.xyz /// -2475.96036319345

79

|   |         |          |          |
|---|---------|----------|----------|
| C | 1.71656 | 0.60854  | -0.51354 |
| C | 2.90909 | 1.39609  | -0.63795 |
| C | 4.09894 | 0.76187  | -1.01123 |
| H | 5.00024 | 1.37687  | -1.09090 |
| C | 4.15916 | -0.62087 | -1.29174 |
| S | 5.63562 | -1.45478 | -1.78712 |
| C | 2.99589 | -1.42711 | -1.14707 |
| C | 1.81255 | -0.79063 | -0.75810 |
| H | 0.91881 | -1.41167 | -0.63744 |
| C | 2.93722 | 2.87618  | -0.32566 |
| H | 2.95134 | 3.05014  | 0.76445  |
| H | 2.04954 | 3.39652  | -0.72158 |
| H | 3.83167 | 3.35639  | -0.75378 |

|   |          |          |          |
|---|----------|----------|----------|
| C | 3.03711  | -2.91549 | -1.38077 |
| H | 3.79544  | -3.39647 | -0.73462 |
| H | 3.30595  | -3.15939 | -2.42429 |
| H | 2.06081  | -3.37431 | -1.16413 |
| C | -0.71155 | 2.78768  | -1.24579 |
| C | -1.93983 | 3.49136  | -1.04998 |
| C | -2.32063 | 4.43133  | -2.02152 |
| H | -3.25917 | 4.97944  | -1.87907 |
| C | -1.55087 | 4.67397  | -3.16842 |
| C | -0.35501 | 3.97149  | -3.39167 |
| C | 0.04281  | 3.03362  | -2.41929 |
| H | 0.96877  | 2.47003  | -2.57701 |
| C | -2.85238 | 3.21991  | 0.12467  |
| H | -3.32905 | 2.22863  | 0.03108  |
| H | -3.65360 | 3.97297  | 0.18587  |
| H | -2.30855 | 3.22405  | 1.08426  |
| C | 0.49487  | 4.23050  | -4.61415 |
| H | 1.21208  | 5.05186  | -4.43590 |
| H | -0.12275 | 4.52157  | -5.47896 |
| H | 1.08066  | 3.34087  | -4.89542 |
| C | -1.45346 | 0.00364  | 0.02393  |
| C | -1.84939 | -0.72737 | -1.14652 |
| C | -2.84998 | -1.69632 | -1.02415 |
| H | -3.14592 | -2.24097 | -1.92519 |
| C | -3.47660 | -1.98057 | 0.20966  |
| S | -4.76485 | -3.17259 | 0.39814  |
| C | -3.14305 | -1.22780 | 1.37053  |
| C | -2.14816 | -0.25286 | 1.23984  |
| H | -1.88738 | 0.33013  | 2.12919  |
| C | -1.26840 | -0.43233 | -2.50992 |
| H | -0.16678 | -0.39659 | -2.48845 |
| H | -1.60901 | 0.55290  | -2.87241 |
| H | -1.57211 | -1.19094 | -3.24830 |
| C | -3.84084 | -1.45151 | 2.68823  |
| H | -3.74629 | -2.49790 | 3.02887  |
| H | -4.92315 | -1.23467 | 2.61076  |
| H | -3.42033 | -0.80130 | 3.46999  |
| C | 0.36221  | 2.07715  | 1.87529  |
| C | 0.81459  | 1.27451  | 2.97043  |
| C | 1.05066  | 1.91971  | 4.19567  |
| H | 1.38957  | 1.31630  | 5.04570  |
| C | 0.87253  | 3.30099  | 4.36643  |
| H | 1.06568  | 3.75448  | 5.34462  |
| C | 0.45773  | 4.10721  | 3.29533  |
| C | 0.21085  | 3.47470  | 2.06037  |
| H | -0.10759 | 4.09298  | 1.21292  |

|    |          |          |          |
|----|----------|----------|----------|
| C  | 1.07280  | -0.21057 | 2.85186  |
| H  | 1.40265  | -0.62753 | 3.81614  |
| H  | 1.85726  | -0.42038 | 2.10528  |
| H  | 0.17385  | -0.76656 | 2.53480  |
| C  | 0.29887  | 5.60288  | 3.43995  |
| H  | 1.17940  | 6.13932  | 3.04329  |
| H  | 0.18527  | 5.89562  | 4.49562  |
| H  | -0.58000 | 5.97113  | 2.88612  |
| Os | -0.03084 | 1.38587  | 0.03244  |
| C  | -4.85797 | -3.99406 | -1.22727 |
| H  | -5.66890 | -4.72966 | -1.12949 |
| H  | -3.90802 | -4.50427 | -1.44476 |
| H  | -5.12001 | -3.27633 | -2.01665 |
| C  | 6.89731  | -0.13915 | -1.80103 |
| H  | -1.89193 | 5.41293  | -3.90186 |
| H  | 7.83451  | -0.64720 | -2.06802 |
| H  | 7.00409  | 0.30197  | -0.80029 |
| H  | 6.65048  | 0.62222  | -2.55567 |
| Au | -7.06627 | -1.94033 | 0.31659  |
| Au | 6.72132  | -2.91286 | 0.15469  |

17\_QChem\_Model\_PBE\_Si1h-Au1\_sim.xyz /// -2360.15678980524

55

|    |          |          |          |
|----|----------|----------|----------|
| C  | 1.44967  | -0.49708 | 0.53351  |
| C  | 1.70146  | 0.74482  | -0.09786 |
| C  | 2.86130  | 1.47754  | 0.16404  |
| C  | 3.80861  | 0.98129  | 1.08373  |
| C  | 3.57123  | -0.23561 | 1.74721  |
| C  | 2.39952  | -0.95426 | 1.47121  |
| Si | -0.05915 | -1.53309 | 0.03427  |
| C  | -0.49372 | -2.78237 | 1.39044  |
| C  | -1.51380 | -0.35149 | -0.25488 |
| C  | 0.32179  | -2.46916 | -1.56819 |
| C  | 0.25912  | -3.97134 | 1.53984  |
| C  | -1.56123 | -2.55834 | 2.28868  |
| C  | -1.82931 | 0.67375  | 0.67004  |
| C  | -2.34682 | -0.48268 | -1.38701 |
| C  | -0.42105 | -3.62534 | -1.90371 |
| C  | 1.30748  | -2.02685 | -2.47830 |
| C  | -0.03552 | -4.89304 | 2.55510  |
| C  | -1.86148 | -3.48013 | 3.30170  |
| C  | -2.93123 | 1.51277  | 0.48667  |
| C  | -3.45564 | 0.34921  | -1.59032 |
| C  | -0.19466 | -4.30740 | -3.10795 |

|    |          |          |          |
|----|----------|----------|----------|
| C  | 1.53866  | -2.70820 | -3.68197 |
| C  | -1.09723 | -4.64768 | 3.43847  |
| C  | -3.75120 | 1.35316  | -0.65100 |
| C  | 0.78584  | -3.84827 | -3.99947 |
| H  | 0.97600  | 1.14977  | -0.81209 |
| H  | 3.04601  | 2.42383  | -0.35450 |
| S  | 5.28576  | 1.96178  | 1.27274  |
| H  | 4.28838  | -0.63444 | 2.46885  |
| H  | 2.22854  | -1.90053 | 1.99593  |
| H  | 1.07407  | -4.18859 | 0.83992  |
| H  | -2.17661 | -1.65738 | 2.19133  |
| H  | -1.19600 | 0.82570  | 1.55118  |
| H  | -2.13079 | -1.25551 | -2.13245 |
| H  | -1.17752 | -4.00530 | -1.20778 |
| H  | 1.90804  | -1.14225 | -2.23992 |
| H  | 0.55835  | -5.80768 | 2.65062  |
| H  | -2.69783 | -3.28911 | 3.98156  |
| H  | -3.16062 | 2.28990  | 1.22298  |
| H  | -4.07820 | 0.20823  | -2.47615 |
| H  | -0.77959 | -5.20110 | -3.34785 |
| H  | 2.31098  | -2.35085 | -4.37044 |
| H  | -1.33288 | -5.36956 | 4.22676  |
| S  | -5.13881 | 2.46345  | -0.77053 |
| C  | -5.84767 | 2.10786  | -2.41165 |
| H  | -6.70335 | 2.79049  | -2.51137 |
| H  | -6.21014 | 1.07228  | -2.46433 |
| H  | -5.10613 | 2.31799  | -3.19660 |
| C  | 6.25812  | 1.05454  | 2.52080  |
| H  | 0.96706  | -4.38113 | -4.93830 |
| H  | 7.18685  | 1.63017  | 2.64039  |
| H  | 6.50621  | 0.04509  | 2.16324  |
| H  | 5.71345  | 1.02228  | 3.47621  |
| Au | -7.05163 | 1.37538  | 0.67727  |
| Au | 6.69130  | 1.27981  | -0.84504 |

**18\_QChem\_Model\_PBE\_Si1h-Au1\_diff.xyz ///** -2360.18110871945

55

|    |          |         |         |
|----|----------|---------|---------|
| C  | -0.28461 | 3.03534 | 1.41219 |
| C  | -0.10624 | 2.85848 | 2.80471 |
| C  | -0.30623 | 3.91831 | 3.70125 |
| C  | -0.68545 | 5.18043 | 3.22048 |
| C  | -0.86348 | 5.37735 | 1.84361 |
| C  | -0.66412 | 4.31530 | 0.94976 |
| Si | -0.06226 | 1.59117 | 0.21123 |

|   |          |          |          |
|---|----------|----------|----------|
| C | 0.10653  | 2.21140  | -1.56832 |
| C | 1.50183  | 0.62436  | 0.67679  |
| C | -1.56255 | 0.43586  | 0.30518  |
| C | -1.03289 | 2.57902  | -2.32271 |
| C | 1.37671  | 2.35131  | -2.17218 |
| C | 2.59505  | 1.25156  | 1.32105  |
| C | 1.65288  | -0.73323 | 0.31719  |
| C | -1.85853 | -0.44475 | -0.76368 |
| C | -2.40446 | 0.38784  | 1.43906  |
| C | -0.90648 | 3.07570  | -3.62808 |
| C | 1.50558  | 2.84452  | -3.47842 |
| C | 3.78615  | 0.56618  | 1.57497  |
| C | 2.84078  | -1.43549 | 0.55500  |
| C | -2.92884 | -1.34088 | -0.69974 |
| C | -3.49117 | -0.49199 | 1.51615  |
| C | 0.36412  | 3.20845  | -4.20738 |
| C | 3.91580  | -0.78383 | 1.18758  |
| C | -3.74838 | -1.37197 | 0.44769  |
| H | 0.20524  | 1.88153  | 3.19288  |
| H | -0.16080 | 3.76088  | 4.77475  |
| H | -0.83807 | 6.00991  | 3.91810  |
| H | -1.15465 | 6.36189  | 1.46407  |
| H | -0.79971 | 4.48279  | -0.12425 |
| H | -2.03327 | 2.46487  | -1.88942 |
| H | 2.27675  | 2.06463  | -1.61715 |
| H | 2.51541  | 2.29894  | 1.63109  |
| H | 0.82534  | -1.26360 | -0.16684 |
| H | -1.24816 | -0.42296 | -1.67336 |
| H | -2.22217 | 1.06898  | 2.27754  |
| H | -1.80055 | 3.35309  | -4.19548 |
| H | 2.49830  | 2.94053  | -3.92941 |
| H | 4.62314  | 1.07923  | 2.05957  |
| H | 2.91755  | -2.48048 | 0.24587  |
| H | -3.13716 | -2.01288 | -1.53853 |
| H | -4.13571 | -0.47581 | 2.39855  |
| H | 0.46387  | 3.59047  | -5.22831 |
| S | 5.49925  | -1.53415 | 1.50588  |
| S | -5.12002 | -2.50411 | 0.39189  |
| C | 5.26576  | -3.26879 | 0.99494  |
| C | -5.59859 | -2.70210 | 2.14206  |
| H | 6.23289  | -3.75879 | 1.17430  |
| H | 5.02819  | -3.32713 | -0.07647 |
| H | 4.48590  | -3.74241 | 1.60960  |
| H | -6.36665 | -3.48862 | 2.14496  |
| H | -6.03767 | -1.77943 | 2.54488  |
| H | -4.72612 | -3.02418 | 2.72940  |

|    |          |          |          |
|----|----------|----------|----------|
| Au | -7.17975 | -1.09224 | -0.37983 |
| Au | 7.00150  | -0.77984 | -0.51003 |

**19\_QChem\_Model\_PBE\_C1h-Au1\_sim.xyz ///** -2108.85135941170

55

|   |          |          |          |
|---|----------|----------|----------|
| C | -1.15861 | -0.70795 | 0.19755  |
| C | -1.55928 | 0.13637  | -0.86356 |
| C | -2.57601 | 1.08032  | -0.71233 |
| C | -3.20226 | 1.23978  | 0.54070  |
| C | -2.79866 | 0.42721  | 1.61802  |
| C | -1.79344 | -0.52922 | 1.44314  |
| C | 0.02492  | -1.68494 | -0.01808 |
| H | -1.06352 | 0.04942  | -1.83510 |
| H | -2.86894 | 1.69036  | -1.56967 |
| S | -4.54490 | 2.35932  | 0.85336  |
| H | -3.27128 | 0.54305  | 2.59844  |
| H | -1.50123 | -1.14646 | 2.29591  |
| C | 0.24044  | -2.63907 | 1.18855  |
| C | 1.22251  | -0.72410 | -0.23361 |
| C | -0.20183 | -2.64172 | -1.21997 |
| C | -0.82387 | -3.47437 | 1.59505  |
| C | 1.48238  | -2.79434 | 1.83105  |
| C | 1.61980  | 0.12559  | 0.82579  |
| C | 1.88039  | -0.57218 | -1.46971 |
| C | 0.85201  | -3.49211 | -1.62286 |
| C | -1.44628 | -2.78710 | -1.85999 |
| C | -0.66218 | -4.40084 | 2.63075  |
| H | -1.78828 | -3.40514 | 1.08199  |
| C | 1.64888  | -3.73140 | 2.86388  |
| H | 2.33701  | -2.18563 | 1.52559  |
| C | 2.65805  | 1.04545  | 0.68182  |
| H | 1.10861  | 0.05539  | 1.79052  |
| C | 2.91321  | 0.35878  | -1.63570 |
| H | 1.58720  | -1.18953 | -2.32203 |
| C | 0.67876  | -4.42189 | -2.65372 |
| H | 1.81705  | -3.43277 | -1.10983 |
| C | -1.62465 | -3.72756 | -2.88774 |
| H | -2.29404 | -2.16862 | -1.55504 |
| C | 0.57801  | -4.53274 | 3.27471  |
| H | -1.50668 | -5.03042 | 2.92767  |
| H | 2.62746  | -3.83049 | 3.34373  |
| C | 3.31381  | 1.17244  | -0.56017 |
| H | 2.96059  | 1.65403  | 1.53754  |
| H | 3.40767  | 0.45456  | -2.60731 |

|    |          |          |          |
|----|----------|----------|----------|
| C  | -0.56335 | -4.54279 | -3.29604 |
| H  | 1.51554  | -5.06309 | -2.94765 |
| H  | -2.60518 | -3.81905 | -3.36518 |
| H  | 0.70784  | -5.26050 | 4.08122  |
| S  | 4.71055  | 2.23915  | -0.82578 |
| H  | -0.70231 | -5.27333 | -4.09852 |
| C  | -4.40407 | 3.58584  | -0.49027 |
| C  | 4.34965  | 3.67717  | 0.24532  |
| H  | -5.17688 | 4.33908  | -0.28055 |
| H  | -4.60757 | 3.13444  | -1.47071 |
| H  | -3.40655 | 4.04833  | -0.46143 |
| H  | 5.15380  | 4.40089  | 0.04873  |
| H  | 4.37504  | 3.40414  | 1.30932  |
| H  | 3.37624  | 4.10549  | -0.03508 |
| Au | 6.64032  | 1.24315  | 0.64835  |
| Au | -6.73651 | 1.19955  | 0.06769  |

**20\_QChem\_Model\_PBE\_C1h-Au1\_diff.xyz ///** -2108.84970336778

55

|   |          |          |          |
|---|----------|----------|----------|
| C | 0.04504  | 1.74153  | 1.71905  |
| C | 1.26777  | 2.04486  | 2.36111  |
| C | 1.34226  | 2.18977  | 3.75122  |
| C | 0.19427  | 2.02329  | 4.54060  |
| C | -1.02015 | 1.70850  | 3.92106  |
| C | -1.09417 | 1.56891  | 2.52518  |
| C | 0.02570  | 1.61457  | 0.16883  |
| H | 2.17415  | 2.16069  | 1.75898  |
| H | 2.30320  | 2.42652  | 4.21842  |
| H | -1.92273 | 1.56068  | 4.52203  |
| H | -2.05317 | 1.30932  | 2.07108  |
| C | -1.31092 | 0.98762  | -0.32094 |
| C | 1.22239  | 0.71117  | -0.23936 |
| C | 0.14032  | 3.01353  | -0.50620 |
| C | -2.48185 | 1.77836  | -0.31139 |
| C | -1.42634 | -0.33169 | -0.79954 |
| C | 1.45957  | -0.47923 | 0.48572  |
| C | 2.09696  | 1.00231  | -1.30419 |
| C | -0.12048 | 3.12571  | -1.89162 |
| C | 0.48785  | 4.18402  | 0.19150  |
| C | -3.71606 | 1.27956  | -0.73842 |
| H | -2.42432 | 2.81328  | 0.03792  |
| C | -2.64880 | -0.84119 | -1.25021 |
| H | -0.54681 | -0.97724 | -0.84030 |
| C | 2.50402  | -1.35028 | 0.16206  |

|    |          |          |          |
|----|----------|----------|----------|
| H  | 0.81946  | -0.72336 | 1.33914  |
| C  | 3.14304  | 0.13859  | -1.64638 |
| H  | 1.97672  | 1.92214  | -1.88044 |
| C  | -0.01360 | 4.35316  | -2.55587 |
| H  | -0.42153 | 2.23527  | -2.45240 |
| C  | 0.58769  | 5.41834  | -0.47186 |
| H  | 0.67379  | 4.14198  | 1.26668  |
| C  | -3.80426 | -0.03712 | -1.22866 |
| H  | -4.59619 | 1.92476  | -0.69539 |
| H  | -2.70371 | -1.86902 | -1.62234 |
| C  | 3.34817  | -1.05136 | -0.92370 |
| H  | 2.65229  | -2.25034 | 0.76353  |
| H  | 3.80633  | 0.39523  | -2.47837 |
| C  | 0.34394  | 5.50988  | -1.84661 |
| H  | -0.21799 | 4.40614  | -3.62979 |
| H  | 0.85449  | 6.31273  | 0.09965  |
| S  | -5.30070 | -0.78782 | -1.83399 |
| S  | 4.72535  | -2.05837 | -1.43541 |
| H  | 0.42288  | 6.47226  | -2.36115 |
| C  | 4.45807  | -3.63531 | -0.55596 |
| H  | 5.25685  | -4.30387 | -0.90738 |
| H  | 3.47531  | -4.04973 | -0.82570 |
| H  | 4.55585  | -3.50694 | 0.53130  |
| C  | -6.51782 | 0.56742  | -1.78384 |
| H  | 0.25088  | 2.12917  | 5.62812  |
| H  | -7.45612 | 0.12563  | -2.14783 |
| H  | -6.20450 | 1.38629  | -2.44852 |
| H  | -6.66710 | 0.91713  | -0.75303 |
| Au | -6.34406 | -2.22576 | 0.12214  |
| Au | 6.82210  | -1.26471 | -0.11134 |

**21\_QChem\_Model\_B3LYP\_Os1h\_sim.xyz ///** -2207.18078397311

77

|   |          |         |         |
|---|----------|---------|---------|
| C | -0.07521 | 1.23229 | 2.07113 |
| C | 0.92079  | 2.07612 | 2.63947 |
| C | 0.77123  | 2.47571 | 3.96958 |
| H | 1.53554  | 3.11041 | 4.41338 |
| C | -0.33112 | 2.09593 | 4.73988 |
| H | -0.40841 | 2.43130 | 5.77140 |
| C | -1.33420 | 1.29499 | 4.19286 |
| C | -1.18631 | 0.87744 | 2.86077 |
| H | -1.96345 | 0.25405 | 2.42734 |
| C | 2.09948  | 2.59824 | 1.84549 |
| H | 1.81946  | 3.48212 | 1.26058 |

|   |          |          |          |
|---|----------|----------|----------|
| H | 2.48735  | 1.86130  | 1.13704  |
| H | 2.92041  | 2.88813  | 2.50916  |
| C | -2.53787 | 0.86785  | 5.00093  |
| H | -2.55436 | 1.35658  | 5.97926  |
| H | -2.54108 | -0.21552 | 5.17135  |
| H | -3.47357 | 1.11369  | 4.48631  |
| C | 1.59607  | -0.65745 | -0.11985 |
| C | 1.88149  | -1.32885 | -1.34007 |
| C | 2.99389  | -2.17355 | -1.39862 |
| H | 3.19655  | -2.67380 | -2.33945 |
| C | 3.83179  | -2.39529 | -0.29680 |
| S | 5.25723  | -3.46929 | -0.34905 |
| C | 3.55237  | -1.75590 | 0.92704  |
| C | 2.44328  | -0.90570 | 0.97940  |
| H | 2.23011  | -0.41844 | 1.92582  |
| C | 1.01491  | -1.19170 | -2.57431 |
| H | 0.00459  | -1.57274 | -2.39495 |
| H | 1.43950  | -1.75045 | -3.41358 |
| H | 0.90987  | -0.14892 | -2.89059 |
| C | 4.41236  | -1.96916 | 2.14836  |
| H | 5.45433  | -1.68148 | 1.96190  |
| H | 4.42494  | -3.02261 | 2.45423  |
| H | 4.04534  | -1.37861 | 2.99183  |
| C | -1.60181 | -0.57168 | -0.29724 |
| C | -1.89282 | -1.81076 | 0.33404  |
| C | -3.03342 | -2.51721 | -0.05783 |
| H | -3.24246 | -3.45615 | 0.44339  |
| C | -3.89143 | -2.06032 | -1.06741 |
| S | -5.35572 | -2.93917 | -1.58660 |
| C | -3.60005 | -0.85147 | -1.73134 |
| C | -2.46442 | -0.14225 | -1.32733 |
| H | -2.24736 | 0.78737  | -1.84526 |
| C | -0.98920 | -2.41707 | 1.38576  |
| H | -0.66252 | -1.67672 | 2.12137  |
| H | -0.08289 | -2.83292 | 0.93262  |
| H | -1.49478 | -3.22359 | 1.92572  |
| C | -4.48054 | -0.32548 | -2.83795 |
| H | -5.50393 | -0.14618 | -2.48603 |
| H | -4.55195 | -1.03827 | -3.66860 |
| H | -4.09112 | 0.61529  | -3.23564 |
| C | 0.12488  | 2.22290  | -0.97819 |
| C | -0.84326 | 3.26449  | -0.95202 |
| C | -0.65580 | 4.36282  | -1.79642 |
| H | -1.40127 | 5.15549  | -1.79572 |
| C | 0.45651  | 4.47713  | -2.63273 |
| H | 0.55880  | 5.35055  | -3.27275 |

|    |          |          |          |
|----|----------|----------|----------|
| C  | 1.43916  | 3.48445  | -2.64417 |
| C  | 1.25044  | 2.37023  | -1.81422 |
| H  | 2.00905  | 1.59275  | -1.81423 |
| C  | -2.03704 | 3.24264  | -0.02284 |
| H  | -2.75124 | 4.02867  | -0.28579 |
| H  | -1.72998 | 3.40257  | 1.01635  |
| H  | -2.56679 | 2.28631  | -0.05207 |
| C  | 2.67765  | 3.61305  | -3.50079 |
| H  | 3.42840  | 4.25360  | -3.02091 |
| H  | 2.44805  | 4.05949  | -4.47389 |
| H  | 3.14505  | 2.63988  | -3.67754 |
| Os | 0.00742  | 0.56058  | 0.16401  |
| C  | -5.43702 | -4.36511 | -0.45573 |
| C  | 5.29432  | -4.06296 | -2.07121 |
| H  | -6.34767 | -4.90046 | -0.73264 |
| H  | -5.51647 | -4.04642 | 0.58624  |
| H  | -4.58245 | -5.03439 | -0.58061 |
| H  | 6.17476  | -4.70575 | -2.13677 |
| H  | 5.40483  | -3.23758 | -2.77834 |
| H  | 4.40757  | -4.65239 | -2.31560 |

**22\_QChem\_Model\_B3LYP\_Os1h\_diff.xyz ///** -2207.17995773226

77

|   |          |          |          |
|---|----------|----------|----------|
| C | 1.56303  | -0.70222 | 0.42200  |
| C | 2.89495  | -0.26764 | 0.65686  |
| C | 3.86605  | -1.21527 | 0.99263  |
| H | 4.87771  | -0.85917 | 1.15804  |
| C | 3.57398  | -2.57980 | 1.12624  |
| S | 4.79737  | -3.80765 | 1.55379  |
| C | 2.25439  | -3.02786 | 0.91945  |
| C | 1.28819  | -2.07763 | 0.57398  |
| H | 0.27331  | -2.43220 | 0.42024  |
| C | 3.30302  | 1.18936  | 0.59234  |
| H | 2.86927  | 1.75800  | 1.42159  |
| H | 2.97045  | 1.67108  | -0.33241 |
| H | 4.39074  | 1.29153  | 0.64812  |
| C | 1.87779  | -4.48291 | 1.05746  |
| H | 2.07987  | -4.85752 | 2.06843  |
| H | 2.44836  | -5.11454 | 0.36532  |
| H | 0.81496  | -4.62939 | 0.84930  |
| C | 0.31440  | 1.41905  | -1.86787 |
| C | -0.63355 | 2.29424  | -2.47439 |
| C | -0.33123 | 2.82461  | -3.73118 |
| H | -1.04919 | 3.49361  | -4.20089 |

|   |          |          |          |
|---|----------|----------|----------|
| C | 0.85024  | 2.51395  | -4.40961 |
| C | 1.77962  | 1.64056  | -3.84503 |
| C | 1.48943  | 1.10613  | -2.57997 |
| H | 2.20254  | 0.41318  | -2.14242 |
| C | -1.95699 | 2.64751  | -1.83078 |
| H | -2.53185 | 1.75046  | -1.58155 |
| H | -2.56267 | 3.25853  | -2.50639 |
| H | -1.82921 | 3.21247  | -0.90096 |
| C | 3.06815  | 1.28927  | -4.55223 |
| H | 3.91393  | 1.86048  | -4.14916 |
| H | 3.00699  | 1.50681  | -5.62264 |
| H | 3.31253  | 0.22823  | -4.43575 |
| C | -1.68233 | -0.50271 | -0.23844 |
| C | -1.90243 | -1.49452 | -1.22968 |
| C | -3.13117 | -2.16053 | -1.26011 |
| H | -3.27230 | -2.92241 | -2.01938 |
| C | -4.16657 | -1.86703 | -0.36260 |
| S | -5.74387 | -2.70341 | -0.37643 |
| C | -3.98043 | -0.86078 | 0.60786  |
| C | -2.74496 | -0.20743 | 0.64113  |
| H | -2.60848 | 0.57101  | 1.38513  |
| C | -0.87761 | -1.82075 | -2.29556 |
| H | 0.14732  | -1.74244 | -1.92363 |
| H | -0.96143 | -1.12748 | -3.14032 |
| H | -1.01853 | -2.83522 | -2.68194 |
| C | -5.06809 | -0.49580 | 1.58779  |
| H | -5.34916 | -1.35125 | 2.21444  |
| H | -5.97942 | -0.16769 | 1.07311  |
| H | -4.74389 | 0.31247  | 2.24853  |
| C | -0.05332 | 1.88814  | 1.43021  |
| C | -0.21403 | 1.55571  | 2.80617  |
| C | -0.25005 | 2.59948  | 3.73633  |
| H | -0.38163 | 2.35521  | 4.78829  |
| C | -0.11981 | 3.93866  | 3.36309  |
| H | -0.15746 | 4.71474  | 4.12421  |
| C | 0.07137  | 4.28385  | 2.02386  |
| C | 0.10067  | 3.24621  | 1.08119  |
| H | 0.25622  | 3.50582  | 0.03837  |
| C | -0.33654 | 0.13086  | 3.30435  |
| H | -0.26745 | 0.09864  | 4.39564  |
| H | 0.45320  | -0.50774 | 2.89853  |
| H | -1.29226 | -0.32483 | 3.02324  |
| C | 0.26713  | 5.72184  | 1.60179  |
| H | 1.31442  | 6.03111  | 1.71114  |
| H | -0.33550 | 6.40214  | 2.21211  |
| H | -0.00900 | 5.87252  | 0.55406  |

|    |          |          |          |
|----|----------|----------|----------|
| Os | 0.04028  | 0.53339  | -0.06777 |
| C  | -5.60512 | -3.87524 | -1.76335 |
| H  | -6.56710 | -4.39066 | -1.80333 |
| H  | -4.81656 | -4.61216 | -1.59375 |
| H  | -5.44092 | -3.35886 | -2.71198 |
| C  | 6.32674  | -2.84014 | 1.76472  |
| H  | 1.03819  | 2.94801  | -5.38878 |
| H  | 7.09401  | -3.56667 | 2.04029  |
| H  | 6.22903  | -2.10588 | 2.56763  |
| H  | 6.62294  | -2.34680 | 0.83613  |

**23\_QChem\_Model\_B3LYP\_Si1h\_sim.xyz ///** -2091.13741268375  
53

|    |          |          |          |
|----|----------|----------|----------|
| C  | 1.53416  | 0.37403  | -0.04326 |
| C  | 1.55948  | 1.56386  | -0.80020 |
| C  | 2.69894  | 2.35714  | -0.88378 |
| C  | 3.87110  | 1.99091  | -0.20114 |
| C  | 3.86668  | 0.81861  | 0.56477  |
| C  | 2.71495  | 0.03179  | 0.63569  |
| Si | -0.00000 | -0.72817 | 0.00001  |
| C  | 0.04950  | -1.83340 | 1.53700  |
| C  | -1.53416 | 0.37403  | 0.04328  |
| C  | -0.04951 | -1.83339 | -1.53700 |
| C  | 0.81116  | -3.01854 | 1.55351  |
| C  | -0.63455 | -1.48399 | 2.71595  |
| C  | -1.55948 | 1.56386  | 0.80022  |
| C  | -2.71495 | 0.03179  | -0.63567 |
| C  | -0.81117 | -3.01853 | -1.55351 |
| C  | 0.63454  | -1.48398 | -2.71594 |
| C  | 0.89417  | -3.81384 | 2.69818  |
| C  | -0.55699 | -2.27663 | 3.86282  |
| C  | -2.69895 | 2.35714  | 0.88380  |
| C  | -3.86668 | 0.81861  | -0.56475 |
| C  | -0.89418 | -3.81383 | -2.69818 |
| C  | 0.55698  | -2.27662 | -3.86281 |
| C  | 0.20959  | -3.44311 | 3.85700  |
| C  | -3.87110 | 1.99091  | 0.20116  |
| C  | -0.20960 | -3.44310 | -3.85700 |
| H  | 0.66762  | 1.88736  | -1.33135 |
| H  | 2.68183  | 3.26721  | -1.47781 |
| S  | 5.26821  | 3.08090  | -0.37826 |
| H  | 4.74925  | 0.50894  | 1.11329  |
| H  | 2.74485  | -0.86873 | 1.24353  |
| H  | 1.33898  | -3.33425 | 0.65681  |
| H  | -1.24215 | -0.58328 | 2.73811  |

|   |          |          |          |
|---|----------|----------|----------|
| H | -0.66763 | 1.88736  | 1.33137  |
| H | -2.74486 | -0.86872 | -1.24352 |
| H | -1.33899 | -3.33425 | -0.65681 |
| H | 1.24214  | -0.58327 | -2.73809 |
| H | 1.48809  | -4.72385 | 2.68332  |
| H | -1.09814 | -1.98547 | 4.75915  |
| H | -2.68184 | 3.26720  | 1.47783  |
| H | -4.74926 | 0.50895  | -1.11328 |
| H | -1.48810 | -4.72384 | -2.68332 |
| H | 1.09814  | -1.98546 | -4.75914 |
| H | 0.26933  | -4.06190 | 4.74824  |
| S | -5.26821 | 3.08090  | 0.37828  |
| C | -6.57759 | 2.26396  | -0.58957 |
| H | -7.46035 | 2.89730  | -0.47960 |
| H | -6.80440 | 1.26968  | -0.19786 |
| H | -6.31758 | 2.20215  | -1.64887 |
| C | 6.57761  | 2.26391  | 0.58951  |
| H | -0.26934 | -4.06188 | -4.74824 |
| H | 7.46035  | 2.89727  | 0.47959  |
| H | 6.80443  | 1.26966  | 0.19772  |
| H | 6.31762  | 2.20200  | 1.64881  |

24\_QChem\_Model\_B3LYP\_Si1h\_diff.xyz /// -2091.13746426853

53

|    |          |          |          |
|----|----------|----------|----------|
| C  | -0.11304 | 1.96593  | 1.55831  |
| C  | 0.19303  | 1.42744  | 2.82389  |
| C  | 0.07789  | 2.19242  | 3.98604  |
| C  | -0.34013 | 3.52244  | 3.90834  |
| C  | -0.63992 | 4.08062  | 2.66475  |
| C  | -0.52685 | 3.30972  | 1.50610  |
| Si | -0.00911 | 0.89818  | -0.00193 |
| C  | 0.06999  | 2.00309  | -1.53733 |
| C  | 1.54499  | -0.17172 | 0.10851  |
| C  | -1.53990 | -0.20451 | -0.13326 |
| C  | -1.09728 | 2.58513  | -2.07000 |
| C  | 1.29201  | 2.30062  | -2.16821 |
| C  | 2.73842  | 0.32217  | 0.67439  |
| C  | 1.57768  | -1.48225 | -0.39525 |
| C  | -1.95252 | -0.73814 | -1.37178 |
| C  | -2.29347 | -0.56733 | 0.99495  |
| C  | -1.04605 | 3.43241  | -3.17834 |
| C  | 1.34898  | 3.14637  | -3.27772 |
| C  | 3.89718  | -0.44555 | 0.72861  |
| C  | 2.73208  | -2.26622 | -0.34815 |

|   |          |          |          |
|---|----------|----------|----------|
| C | -3.04439 | -1.59367 | -1.47504 |
| C | -3.39397 | -1.42275 | 0.90810  |
| C | 0.17948  | 3.71513  | -3.78464 |
| C | 3.90695  | -1.75343 | 0.21555  |
| C | -3.77845 | -1.94911 | -0.33121 |
| H | 0.53998  | 0.39988  | 2.90370  |
| H | 0.32033  | 1.75314  | 4.95010  |
| H | -0.42649 | 4.12077  | 4.81129  |
| H | -0.95805 | 5.11746  | 2.59558  |
| H | -0.75704 | 3.76427  | 0.54635  |
| H | -2.06299 | 2.36615  | -1.62081 |
| H | 2.21209  | 1.86113  | -1.79219 |
| H | 2.76256  | 1.32382  | 1.09646  |
| H | 0.68043  | -1.91408 | -0.83140 |
| H | -1.41733 | -0.47354 | -2.28047 |
| H | -2.02616 | -0.17173 | 1.97144  |
| H | -1.96153 | 3.86696  | -3.57090 |
| H | 2.30549  | 3.35812  | -3.74813 |
| H | 4.79829  | -0.03465 | 1.17643  |
| H | 2.70071  | -3.27281 | -0.74972 |
| H | -3.33400 | -1.98672 | -2.44615 |
| H | -3.94358 | -1.66739 | 1.81016  |
| H | 0.22192  | 4.37151  | -4.64960 |
| S | 5.44286  | -2.64887 | 0.33800  |
| S | -5.15361 | -3.05328 | -0.58065 |
| C | 5.03904  | -4.28941 | -0.34262 |
| C | -5.81509 | -3.30645 | 1.09789  |
| H | 5.95674  | -4.87532 | -0.25789 |
| H | 4.75411  | -4.23054 | -1.39567 |
| H | 4.25166  | -4.77928 | 0.23499  |
| H | -6.64654 | -4.00473 | 0.98186  |
| H | -6.19256 | -2.37567 | 1.52765  |
| H | -5.06808 | -3.75194 | 1.75895  |

**25\_QChem\_Model\_B3LYP\_C1h\_sim.xyz ///** -1839.70375063244

53

|   |         |          |          |
|---|---------|----------|----------|
| C | 1.22143 | 0.00043  | -0.14374 |
| C | 1.47927 | 0.93190  | 0.87531  |
| C | 2.52271 | 1.85052  | 0.79337  |
| C | 3.34417 | 1.88698  | -0.34195 |
| C | 3.08281 | 0.98226  | -1.37826 |
| C | 2.04289 | 0.05815  | -1.27698 |
| C | 0.00001 | -0.95122 | 0.00004  |
| H | 0.84110 | 0.95058  | 1.75341  |

|   |          |          |          |
|---|----------|----------|----------|
| H | 2.67767  | 2.53939  | 1.61565  |
| S | 4.70729  | 3.01345  | -0.57247 |
| H | 3.69213  | 0.99906  | -2.27793 |
| H | 1.87287  | -0.61602 | -2.10743 |
| C | -0.13937 | -1.90460 | -1.22230 |
| C | -1.22139 | 0.00048  | 0.14375  |
| C | 0.13936  | -1.90450 | 1.22245  |
| C | 0.89173  | -2.82857 | -1.47554 |
| C | -1.27170 | -1.95537 | -2.04331 |
| C | -1.47921 | 0.93187  | -0.87537 |
| C | -2.04285 | 0.05830  | 1.27697  |
| C | -0.89176 | -2.82843 | 1.47577  |
| C | 1.27168  | -1.95522 | 2.04347  |
| C | 0.81000  | -3.73783 | -2.52639 |
| H | 1.76420  | -2.84145 | -0.82976 |
| C | -1.36175 | -2.87566 | -3.09385 |
| H | -2.10127 | -1.28230 | -1.86507 |
| C | -2.52262 | 1.85054  | -0.79350 |
| H | -0.84103 | 0.95048  | -1.75348 |
| C | -3.08275 | 0.98244  | 1.37818  |
| H | -1.87285 | -0.61582 | 2.10748  |
| C | -0.81005 | -3.73758 | 2.52671  |
| H | -1.76422 | -2.84134 | 0.82999  |
| C | 1.36170  | -2.87541 | 3.09411  |
| H | 2.10127  | -1.28219 | 1.86517  |
| C | -0.32140 | -3.76529 | -3.34666 |
| H | 1.62656  | -4.43373 | -2.69815 |
| H | -2.25620 | -2.89168 | -3.71063 |
| C | -3.34408 | 1.88710  | 0.34181  |
| H | -2.67755 | 2.53937  | -1.61582 |
| H | -3.69210 | 0.99929  | 2.27783  |
| C | 0.32133  | -3.76499 | 3.34699  |
| H | -1.62663 | -4.43345 | 2.69853  |
| H | 2.25615  | -2.89139 | 3.71089  |
| H | -0.39119 | -4.47757 | -4.16379 |
| S | -4.70713 | 3.01367  | 0.57229  |
| H | 0.39110  | -4.47719 | 4.16419  |
| C | 4.64198  | 4.07260  | 0.90810  |
| C | -4.64204 | 4.07245  | -0.90855 |
| H | 5.44874  | 4.79814  | 0.78446  |
| H | 4.81946  | 3.50097  | 1.82220  |
| H | 3.69212  | 4.60811  | 0.97615  |
| H | -5.44884 | 4.79796  | -0.78501 |
| H | -4.81956 | 3.50057  | -1.82248 |
| H | -3.69222 | 4.60801  | -0.97683 |

26\_QChem\_Model\_B3LYP\_C1h\_diff.xyz /// -1839.70392246166

53

|   |          |          |          |
|---|----------|----------|----------|
| C | -0.13245 | -1.49197 | 1.38318  |
| C | -1.27322 | -2.28818 | 1.60032  |
| C | -1.46619 | -2.97404 | 2.79661  |
| C | -0.52668 | -2.87088 | 3.82582  |
| C | 0.59804  | -2.07329 | 3.63552  |
| C | 0.79348  | -1.39247 | 2.42829  |
| C | 0.01405  | -0.75172 | 0.02070  |
| H | -2.02455 | -2.36417 | 0.82044  |
| H | -2.35679 | -3.58271 | 2.92766  |
| H | 1.33393  | -1.96916 | 4.42827  |
| H | 1.67626  | -0.77417 | 2.31944  |
| C | 1.21035  | 0.24173  | 0.04601  |
| C | -1.33118 | -0.00532 | -0.21336 |
| C | 0.30725  | -1.75496 | -1.13516 |
| C | 2.51934  | -0.26782 | 0.04154  |
| C | 1.07262  | 1.63579  | 0.04458  |
| C | -1.85948 | 0.78806  | 0.81870  |
| C | -2.08404 | -0.09258 | -1.39166 |
| C | 0.64780  | -1.24539 | -2.40268 |
| C | 0.28426  | -3.14610 | -0.98249 |
| C | 3.63835  | 0.56192  | 0.06024  |
| H | 2.67022  | -1.34254 | 0.01619  |
| C | 2.18401  | 2.47822  | 0.05041  |
| H | 0.08758  | 2.08461  | 0.02144  |
| C | -3.05994 | 1.48247  | 0.68213  |
| H | -1.32642 | 0.85888  | 1.76181  |
| C | -3.29143 | 0.58945  | -1.53831 |
| H | -1.74186 | -0.70781 | -2.21460 |
| C | 0.92266  | -2.08888 | -3.47608 |
| H | 0.70606  | -0.17072 | -2.54462 |
| C | 0.56913  | -3.99660 | -2.05686 |
| H | 0.05278  | -3.58390 | -0.01936 |
| C | 3.48282  | 1.95482  | 0.06438  |
| H | 4.62432  | 0.11120  | 0.06334  |
| H | 2.03543  | 3.55455  | 0.03419  |
| C | -3.79543 | 1.39185  | -0.50696 |
| H | -3.41375 | 2.08113  | 1.51380  |
| H | -3.84768 | 0.49005  | -2.46672 |
| C | 0.88339  | -3.47565 | -3.30895 |
| H | 1.17627  | -1.66144 | -4.44234 |
| H | 0.54638  | -5.07201 | -1.90288 |
| S | 4.82863  | 3.12474  | 0.09209  |

|   |          |          |          |
|---|----------|----------|----------|
| S | -5.34582 | 2.21808  | -0.80879 |
| H | 1.10318  | -4.13662 | -4.14248 |
| C | -5.66622 | 3.10923  | 0.74796  |
| H | -6.62013 | 3.62012  | 0.60139  |
| H | -4.89463 | 3.85559  | 0.95162  |
| H | -5.75945 | 2.42254  | 1.59256  |
| C | 6.30654  | 2.08202  | -0.12959 |
| H | -0.67674 | -3.39906 | 4.76313  |
| H | 7.14816  | 2.77570  | -0.18511 |
| H | 6.25551  | 1.51137  | -1.05984 |
| H | 6.46191  | 1.40945  | 0.71729  |

27\_QChem\_Model\_B3LYP\_Os1h-Au1\_sim.xyz /// -2478.06722984796

79

|   |          |          |          |
|---|----------|----------|----------|
| C | 0.26142  | -2.20372 | 1.70082  |
| C | -0.65011 | -3.21215 | 2.12007  |
| C | -0.35715 | -3.91374 | 3.29262  |
| H | -1.04748 | -4.68590 | 3.62521  |
| C | 0.79766  | -3.66510 | 4.03817  |
| H | 0.98510  | -4.24019 | 4.94195  |
| C | 1.71697  | -2.69675 | 3.62814  |
| C | 1.42983  | -1.98241 | 2.45589  |
| H | 2.14134  | -1.23853 | 2.11095  |
| C | -1.87633 | -3.59168 | 1.31852  |
| H | -1.59878 | -4.16433 | 0.42696  |
| H | -2.43766 | -2.71864 | 0.97294  |
| H | -2.55548 | -4.20918 | 1.91344  |
| C | 2.96733  | -2.40596 | 4.42500  |
| H | 3.31727  | -3.29577 | 4.95683  |
| H | 2.78708  | -1.62696 | 5.17642  |
| H | 3.77969  | -2.05467 | 3.78168  |
| C | -1.59066 | 0.05547  | 0.06447  |
| C | -1.92354 | 0.99078  | -0.95812 |
| C | -3.05214 | 1.79196  | -0.79222 |
| H | -3.30066 | 2.48277  | -1.59015 |
| C | -3.84724 | 1.74115  | 0.36420  |
| S | -5.27798 | 2.75878  | 0.60560  |
| C | -3.52957 | 0.83248  | 1.39713  |
| C | -2.40920 | 0.01968  | 1.21675  |
| H | -2.16113 | -0.66991 | 2.01767  |
| C | -1.08257 | 1.17889  | -2.20280 |
| H | -0.12932 | 1.66312  | -1.96531 |
| H | -1.60333 | 1.80504  | -2.93295 |
| H | -0.84251 | 0.22843  | -2.68810 |

|    |          |          |          |
|----|----------|----------|----------|
| C  | -4.37288 | 0.71825  | 2.64244  |
| H  | -5.41096 | 0.45635  | 2.39835  |
| H  | -4.40338 | 1.66304  | 3.19866  |
| H  | -3.97730 | -0.05211 | 3.30890  |
| C  | 1.57442  | 0.11298  | -0.24411 |
| C  | 1.89530  | 1.18908  | 0.63430  |
| C  | 3.04031  | 1.94322  | 0.37881  |
| H  | 3.28690  | 2.73774  | 1.07557  |
| C  | 3.86146  | 1.70736  | -0.73527 |
| S  | 5.36453  | 2.59567  | -1.04277 |
| C  | 3.53484  | 0.68052  | -1.64620 |
| C  | 2.39772  | -0.08171 | -1.37529 |
| H  | 2.14485  | -0.87171 | -2.07571 |
| C  | 1.04083  | 1.56130  | 1.82756  |
| H  | 0.91097  | 0.72511  | 2.52216  |
| H  | 0.04000  | 1.87615  | 1.51594  |
| H  | 1.49303  | 2.38641  | 2.38485  |
| C  | 4.39284  | 0.37795  | -2.84943 |
| H  | 5.40696  | 0.08308  | -2.54975 |
| H  | 4.49317  | 1.25006  | -3.50659 |
| H  | 3.96289  | -0.43880 | -3.43406 |
| C  | -0.09489 | -2.46810 | -1.51810 |
| C  | 0.91780  | -3.43586 | -1.76879 |
| C  | 0.74592  | -4.30098 | -2.85406 |
| H  | 1.52265  | -5.03254 | -3.06597 |
| C  | -0.38718 | -4.25765 | -3.66770 |
| H  | -0.47513 | -4.94717 | -4.50376 |
| C  | -1.41009 | -3.34042 | -3.41462 |
| C  | -1.24233 | -2.45650 | -2.33947 |
| H  | -2.03176 | -1.73679 | -2.14358 |
| C  | 2.13774  | -3.60182 | -0.88754 |
| H  | 2.93637  | -4.12217 | -1.42442 |
| H  | 1.89965  | -4.19085 | 0.00534  |
| H  | 2.53971  | -2.64713 | -0.53782 |
| C  | -2.66592 | -3.31246 | -4.25408 |
| H  | -3.41309 | -4.01979 | -3.87292 |
| H  | -2.45869 | -3.58885 | -5.29262 |
| H  | -3.12869 | -2.32109 | -4.25271 |
| Os | 0.01926  | -1.13955 | 0.00074  |
| C  | 5.38078  | 3.90673  | 0.22422  |
| C  | -5.30159 | 3.85204  | -0.85170 |
| H  | 6.29576  | 4.47187  | 0.03973  |
| H  | 5.42093  | 3.48371  | 1.22824  |
| H  | 4.51280  | 4.55831  | 0.10446  |
| H  | -6.16892 | 4.49892  | -0.71102 |
| H  | -5.42918 | 3.28247  | -1.77280 |

|    |          |         |          |
|----|----------|---------|----------|
| H  | -4.39277 | 4.45622 | -0.88340 |
| Au | 7.39590  | 1.06159 | -0.03516 |
| Au | -7.55828 | 1.30520 | 0.06762  |

**28\_QChem\_Model\_B3LYP\_Os1h-Au1\_diff.xyz ///** -2478.06795840824

79

|   |          |          |          |
|---|----------|----------|----------|
| C | 1.75464  | 0.59369  | -0.49117 |
| C | 2.90037  | 1.42565  | -0.66051 |
| C | 4.11317  | 0.83428  | -1.00620 |
| H | 4.97666  | 1.47964  | -1.12644 |
| C | 4.24941  | -0.55223 | -1.18569 |
| S | 5.78827  | -1.32266 | -1.59613 |
| C | 3.14025  | -1.40221 | -0.97363 |
| C | 1.92587  | -0.80196 | -0.64408 |
| H | 1.06792  | -1.45213 | -0.50164 |
| C | 2.86922  | 2.91853  | -0.41546 |
| H | 2.86791  | 3.13825  | 0.65851  |
| H | 1.97780  | 3.38639  | -0.84021 |
| H | 3.74575  | 3.40636  | -0.85205 |
| C | 3.25055  | -2.90222 | -1.09152 |
| H | 3.96817  | -3.30869 | -0.36806 |
| H | 3.59322  | -3.20604 | -2.08766 |
| H | 2.28405  | -3.37699 | -0.90520 |
| C | -0.78817 | 2.69405  | -1.19303 |
| C | -1.98843 | 3.41627  | -0.95486 |
| C | -2.41124 | 4.32969  | -1.92692 |
| H | -3.32594 | 4.89161  | -1.75084 |
| C | -1.70757 | 4.53148  | -3.11435 |
| C | -0.53730 | 3.81381  | -3.37805 |
| C | -0.09943 | 2.90516  | -2.40597 |
| H | 0.81203  | 2.34546  | -2.59705 |
| C | -2.84960 | 3.20418  | 0.27149  |
| H | -3.42123 | 2.27229  | 0.19529  |
| H | -3.56754 | 4.02129  | 0.38741  |
| H | -2.26003 | 3.14547  | 1.19051  |
| C | 0.24557  | 4.02954  | -4.65243 |
| H | 0.78760  | 4.98308  | -4.63100 |
| H | -0.41283 | 4.05406  | -5.52721 |
| H | 0.98196  | 3.23565  | -4.80679 |
| C | -1.47663 | -0.11732 | -0.00962 |
| C | -1.79501 | -0.89120 | -1.16295 |
| C | -2.84090 | -1.80899 | -1.08734 |
| H | -3.06963 | -2.39098 | -1.97369 |
| C | -3.60094 | -1.98420 | 0.08039  |

|    |          |          |          |
|----|----------|----------|----------|
| S  | -4.95115 | -3.11877 | 0.20287  |
| C  | -3.33810 | -1.18920 | 1.22024  |
| C  | -2.27901 | -0.28716 | 1.14406  |
| H  | -2.06118 | 0.30823  | 2.02622  |
| C  | -1.09162 | -0.70167 | -2.48877 |
| H  | -0.01771 | -0.54978 | -2.36357 |
| H  | -1.48309 | 0.18004  | -3.00879 |
| H  | -1.23829 | -1.56653 | -3.14242 |
| C  | -4.17806 | -1.29507 | 2.46774  |
| H  | -4.15518 | -2.30710 | 2.88946  |
| H  | -5.22894 | -1.05949 | 2.25339  |
| H  | -3.82560 | -0.60171 | 3.23513  |
| C  | 0.33962  | 1.92985  | 1.93349  |
| C  | 0.73539  | 1.07771  | 3.00108  |
| C  | 0.99337  | 1.65946  | 4.24553  |
| H  | 1.28382  | 1.01526  | 5.07238  |
| C  | 0.89333  | 3.03604  | 4.45774  |
| H  | 1.09843  | 3.44340  | 5.44477  |
| C  | 0.53321  | 3.89224  | 3.41508  |
| C  | 0.25730  | 3.31785  | 2.16553  |
| H  | -0.03511 | 3.97568  | 1.35093  |
| C  | 0.93149  | -0.41230 | 2.83084  |
| H  | 0.96131  | -0.91582 | 3.80164  |
| H  | 1.87584  | -0.62750 | 2.31814  |
| H  | 0.13452  | -0.86988 | 2.23842  |
| C  | 0.45375  | 5.38816  | 3.61276  |
| H  | 1.36884  | 5.88443  | 3.26593  |
| H  | 0.32446  | 5.64408  | 4.66845  |
| H  | -0.38083 | 5.82407  | 3.05442  |
| Os | -0.04706 | 1.28409  | 0.05859  |
| C  | -4.89610 | -4.05819 | -1.35924 |
| H  | -5.70954 | -4.78177 | -1.28664 |
| H  | -3.94150 | -4.58063 | -1.44820 |
| H  | -5.07240 | -3.41052 | -2.21844 |
| C  | 6.83346  | 0.05321  | -2.18135 |
| H  | -2.07726 | 5.25150  | -3.84079 |
| H  | 7.76021  | -0.41467 | -2.51759 |
| H  | 7.06348  | 0.75181  | -1.37685 |
| H  | 6.34598  | 0.55992  | -3.01667 |
| Au | 7.22245  | -1.85794 | 0.68442  |
| Au | -7.28750 | -1.74671 | -0.24549 |

29\_QChem\_Model\_B3LYP\_Si1h-Au1\_sim.xyz /// -2362.01801287426

|    |          |          |          |
|----|----------|----------|----------|
| C  | 1.49798  | -0.60254 | 0.51529  |
| C  | 1.68890  | 0.60312  | -0.18983 |
| C  | 2.74463  | 1.46118  | 0.09837  |
| C  | 3.65542  | 1.13364  | 1.11483  |
| C  | 3.49201  | -0.05781 | 1.83023  |
| C  | 2.42145  | -0.90252 | 1.53087  |
| Si | 0.08068  | -1.78460 | 0.08539  |
| C  | -0.32311 | -2.87399 | 1.57709  |
| C  | -1.42862 | -0.73822 | -0.38476 |
| C  | 0.57167  | -2.87926 | -1.37731 |
| C  | 0.41342  | -4.04663 | 1.83436  |
| C  | -1.33744 | -2.52482 | 2.48734  |
| C  | -1.71599 | 0.47383  | 0.27545  |
| C  | -2.31279 | -1.13905 | -1.40040 |
| C  | -0.09085 | -4.09820 | -1.62197 |
| C  | 1.57476  | -2.48641 | -2.28210 |
| C  | 0.15441  | -4.83202 | 2.95929  |
| C  | -1.60193 | -3.30794 | 3.61216  |
| C  | -2.82175 | 1.24734  | -0.06161 |
| C  | -3.43356 | -0.38291 | -1.74642 |
| C  | 0.22755  | -4.88561 | -2.73005 |
| C  | 1.89852  | -3.27148 | -3.39015 |
| C  | -0.85446 | -4.46259 | 3.85088  |
| C  | -3.68589 | 0.82346  | -1.08329 |
| C  | 1.22314  | -4.47183 | -3.61721 |
| H  | 0.99498  | 0.88594  | -0.97703 |
| H  | 2.86883  | 2.38071  | -0.46660 |
| S  | 4.95239  | 2.31897  | 1.41678  |
| H  | 4.17974  | -0.33401 | 2.62151  |
| H  | 2.30836  | -1.81460 | 2.11096  |
| H  | 1.18962  | -4.35847 | 1.13975  |
| H  | -1.93451 | -1.63330 | 2.31384  |
| H  | -1.05337 | 0.83578  | 1.05720  |
| H  | -2.12443 | -2.06134 | -1.94315 |
| H  | -0.85661 | -4.44502 | -0.93215 |
| H  | 2.11511  | -1.55816 | -2.11677 |
| H  | 0.73465  | -5.73373 | 3.13607  |
| H  | -2.39311 | -3.01933 | 4.29870  |
| H  | -3.01181 | 2.18183  | 0.45893  |
| H  | -4.08889 | -0.73794 | -2.53358 |
| H  | -0.29637 | -5.82285 | -2.89749 |
| H  | 2.67942  | -2.94787 | -4.07287 |
| H  | -1.06062 | -5.07465 | 4.72471  |
| S  | -5.05688 | 1.90281  | -1.44847 |
| C  | -5.82990 | 1.14940  | -2.91860 |
| H  | -6.66233 | 1.80526  | -3.17840 |

|    |          |          |          |
|----|----------|----------|----------|
| H  | -6.21557 | 0.15437  | -2.69472 |
| H  | -5.11251 | 1.11878  | -3.74113 |
| C  | 6.05106  | 1.48240  | 2.60823  |
| H  | 1.47533  | -5.08489 | -4.47815 |
| H  | 6.90231  | 2.15291  | 2.73712  |
| H  | 6.40151  | 0.52898  | 2.21080  |
| H  | 5.54343  | 1.34716  | 3.56538  |
| Au | -6.97152 | 1.45290  | 0.34179  |
| Au | 6.54409  | 2.26917  | -0.80601 |

**30\_QChem\_Model\_B3LYP\_Si1h-Au1\_diff.xyz ///** -2362.01893203589

55

|    |          |          |          |
|----|----------|----------|----------|
| C  | -0.12956 | 3.12585  | 1.30131  |
| C  | 0.12610  | 2.98657  | 2.68031  |
| C  | -0.00364 | 4.06626  | 3.55519  |
| C  | -0.38746 | 5.31720  | 3.06720  |
| C  | -0.63964 | 5.48050  | 1.70439  |
| C  | -0.51124 | 4.39636  | 0.83362  |
| Si | 0.00021  | 1.64559  | 0.13262  |
| C  | 0.05120  | 2.21983  | -1.66558 |
| C  | 1.58235  | 0.68725  | 0.54688  |
| C  | -1.49453 | 0.50769  | 0.37231  |
| C  | -1.13271 | 2.54198  | -2.35800 |
| C  | 1.27168  | 2.37380  | -2.34868 |
| C  | 2.73315  | 1.34731  | 1.02312  |
| C  | 1.67047  | -0.70507 | 0.37026  |
| C  | -1.85956 | -0.43751 | -0.60924 |
| C  | -2.27160 | 0.54468  | 1.54269  |
| C  | -1.09833 | 3.00608  | -3.67416 |
| C  | 1.31089  | 2.83570  | -3.66541 |
| C  | 3.90884  | 0.65832  | 1.30463  |
| C  | 2.84302  | -1.41154 | 0.63512  |
| C  | -2.93066 | -1.30603 | -0.42792 |
| C  | -3.35449 | -0.31263 | 1.73967  |
| C  | 0.12533  | 3.15407  | -4.33008 |
| C  | 3.96933  | -0.73075 | 1.11343  |
| C  | -3.68569 | -1.25033 | 0.75485  |
| H  | 0.44009  | 2.02384  | 3.07770  |
| H  | 0.19958  | 3.93326  | 4.61442  |
| H  | -0.48550 | 6.16029  | 3.74549  |
| H  | -0.93375 | 6.45256  | 1.31806  |
| H  | -0.70581 | 4.54218  | -0.22543 |
| H  | -2.09601 | 2.42113  | -1.86819 |
| H  | 2.20440  | 2.12451  | -1.84967 |

|    |          |          |          |
|----|----------|----------|----------|
| H  | 2.71004  | 2.42025  | 1.19279  |
| H  | 0.80479  | -1.26128 | 0.02142  |
| H  | -1.30710 | -0.48845 | -1.54410 |
| H  | -2.04098 | 1.26696  | 2.32087  |
| H  | -2.02527 | 3.24616  | -4.18774 |
| H  | 2.26563  | 2.94293  | -4.17286 |
| H  | 4.77777  | 1.19394  | 1.67678  |
| H  | 2.86592  | -2.48285 | 0.47175  |
| H  | -3.19309 | -2.01589 | -1.20779 |
| H  | -3.92918 | -0.23619 | 2.65508  |
| H  | 0.15430  | 3.51142  | -5.35577 |
| S  | 5.52697  | -1.50967 | 1.48569  |
| S  | -5.04660 | -2.39334 | 0.87291  |
| C  | 5.12502  | -3.28779 | 1.55463  |
| C  | -5.74036 | -2.08917 | 2.53088  |
| H  | 6.05260  | -3.78435 | 1.84495  |
| H  | 4.81186  | -3.66492 | 0.58080  |
| H  | 4.35646  | -3.46416 | 2.30979  |
| H  | -6.58393 | -2.77528 | 2.62186  |
| H  | -6.10338 | -1.06485 | 2.62043  |
| H  | -4.99750 | -2.31458 | 3.29874  |
| Au | -7.05494 | -1.31180 | -0.62386 |
| Au | 7.05986  | -1.51303 | -0.75045 |

**31\_QChem\_Model\_B3LYP\_C1h-Au1\_sim.xyz ///** -2110.58746744725

55

|   |          |          |          |
|---|----------|----------|----------|
| C | -1.28459 | -0.62797 | 0.25867  |
| C | -1.69851 | 0.17788  | -0.81921 |
| C | -2.75800 | 1.06845  | -0.70549 |
| C | -3.42400 | 1.21068  | 0.52115  |
| C | -3.00928 | 0.44012  | 1.61290  |
| C | -1.95418 | -0.46222 | 1.47882  |
| C | -0.04471 | -1.54471 | 0.08938  |
| H | -1.18885 | 0.09805  | -1.77368 |
| H | -3.06568 | 1.64157  | -1.57328 |
| S | -4.84254 | 2.25978  | 0.74979  |
| H | -3.50696 | 0.54587  | 2.57245  |
| H | -1.65561 | -1.04121 | 2.34435  |
| C | 0.13911  | -2.53637 | 1.27172  |
| C | 1.11534  | -0.52160 | -0.02758 |
| C | -0.14924 | -2.47050 | -1.15490 |
| C | -0.93076 | -3.37364 | 1.63492  |
| C | 1.36704  | -2.73304 | 1.91669  |
| C | 1.50378  | 0.22679  | 1.09703  |

|    |          |          |          |
|----|----------|----------|----------|
| C  | 1.72876  | -0.20519 | -1.24988 |
| C  | 0.98736  | -3.18719 | -1.56913 |
| C  | -1.35732 | -2.72353 | -1.81713 |
| C  | -0.79011 | -4.33830 | 2.62963  |
| H  | -1.88441 | -3.27707 | 1.12535  |
| C  | 1.51291  | -3.70591 | 2.91051  |
| H  | 2.22737  | -2.13220 | 1.64630  |
| C  | 2.49928  | 1.19670  | 1.02976  |
| H  | 1.02455  | 0.04418  | 2.05325  |
| C  | 2.70966  | 0.77777  | -1.33859 |
| H  | 1.44859  | -0.73639 | -2.15162 |
| C  | 0.92694  | -4.09041 | -2.62738 |
| H  | 1.93084  | -3.04258 | -1.05216 |
| C  | -1.42223 | -3.63640 | -2.87457 |
| H  | -2.26387 | -2.21278 | -1.51369 |
| C  | 0.43547  | -4.50755 | 3.27855  |
| H  | -1.63808 | -4.96521 | 2.89065  |
| H  | 2.47857  | -3.83280 | 3.39192  |
| C  | 3.11667  | 1.48024  | -0.19620 |
| H  | 2.78069  | 1.72410  | 1.93388  |
| H  | 3.17125  | 0.98680  | -2.29957 |
| C  | -0.28150 | -4.31834 | -3.29043 |
| H  | 1.82453  | -4.62345 | -2.92787 |
| H  | -2.37390 | -3.81020 | -3.36892 |
| H  | 0.54847  | -5.26099 | 4.05254  |
| S  | 4.44845  | 2.63613  | -0.41429 |
| H  | -0.33198 | -5.02465 | -4.11391 |
| C  | -4.48555 | 3.68975  | -0.33317 |
| C  | 4.57821  | 3.47199  | 1.20027  |
| H  | -5.27992 | 4.41295  | -0.13968 |
| H  | -4.51436 | 3.40910  | -1.38620 |
| H  | -3.51721 | 4.11675  | -0.06557 |
| H  | 5.38086  | 4.20219  | 1.08593  |
| H  | 4.84982  | 2.76467  | 1.98434  |
| H  | 3.64282  | 3.98422  | 1.43477  |
| Au | 6.70616  | 1.12058  | -0.27534 |
| Au | -6.81047 | 1.18375  | -0.76841 |

**32\_QChem\_Model\_B3LYP\_C1h-Au1\_diff.xyz ///** -2110.58604061701

55

|   |          |         |         |
|---|----------|---------|---------|
| C | -0.14473 | 1.72743 | 1.72705 |
| C | 1.04740  | 2.11481 | 2.36788 |
| C | 1.10782  | 2.28219 | 3.74931 |
| C | -0.02524 | 2.05578 | 4.53485 |

|   |          |          |          |
|---|----------|----------|----------|
| C | -1.20926 | 1.66078  | 3.91824  |
| C | -1.26849 | 1.49794  | 2.52972  |
| C | -0.14422 | 1.56359  | 0.17832  |
| H | 1.94160  | 2.27949  | 1.77488  |
| H | 2.04365  | 2.58278  | 4.21194  |
| H | -2.09784 | 1.46845  | 4.51296  |
| H | -2.20314 | 1.17780  | 2.08614  |
| C | -1.44943 | 0.86364  | -0.30135 |
| C | 1.10055  | 0.70521  | -0.18871 |
| C | -0.08970 | 2.94997  | -0.53091 |
| C | -2.65043 | 1.59754  | -0.32083 |
| C | -1.50797 | -0.46874 | -0.72805 |
| C | 1.37164  | -0.45771 | 0.55624  |
| C | 1.98998  | 1.01897  | -1.22535 |
| C | -0.31995 | 3.01340  | -1.91867 |
| C | 0.16585  | 4.15234  | 0.13886  |
| C | -3.85610 | 1.02725  | -0.71401 |
| H | -2.64330 | 2.63757  | -0.01188 |
| C | -2.70638 | -1.04934 | -1.14514 |
| H | -0.60972 | -1.07181 | -0.75963 |
| C | 2.46337  | -1.27586 | 0.28133  |
| H | 0.72370  | -0.72338 | 1.38540  |
| C | 3.08478  | 0.20655  | -1.51722 |
| H | 1.84710  | 1.91171  | -1.82091 |
| C | -0.27303 | 4.22218  | -2.60920 |
| H | -0.54627 | 2.10157  | -2.46285 |
| C | 0.20570  | 5.36907  | -0.55093 |
| H | 0.32770  | 4.15458  | 1.20937  |
| C | -3.89213 | -0.30802 | -1.13969 |
| H | -4.75953 | 1.62615  | -0.68172 |
| H | -2.71243 | -2.08082 | -1.48523 |
| C | 3.32891  | -0.95131 | -0.77078 |
| H | 2.63400  | -2.15092 | 0.89828  |
| H | 3.75252  | 0.48179  | -2.32856 |
| C | -0.00801 | 5.41152  | -1.92603 |
| H | -0.45117 | 4.23510  | -3.68090 |
| H | 0.40180  | 6.28488  | -0.00034 |
| S | -5.38452 | -1.15702 | -1.61697 |
| S | 4.78607  | -1.88419 | -1.19788 |
| H | 0.02346  | 6.35682  | -2.45996 |
| C | 4.53212  | -3.49395 | -0.37717 |
| H | 5.37134  | -4.11659 | -0.69163 |
| H | 3.59391  | -3.93829 | -0.71580 |
| H | 4.55038  | -3.39700 | 0.70867  |
| C | -6.43550 | 0.17664  | -2.29064 |
| H | 0.02002  | 2.17896  | 5.61302  |

|    |          |          |          |
|----|----------|----------|----------|
| H  | -7.31963 | -0.32082 | -2.69326 |
| H  | -5.90298 | 0.69623  | -3.08953 |
| H  | -6.74629 | 0.87016  | -1.50953 |
| Au | 6.78304  | -0.90185 | 0.35532  |
| Au | -6.79202 | -1.60630 | 0.69674  |

\*\*\*

**33\_FHI-aims\_Molecule\_Os1.xyz ///** -566287.731908578 eV

85

# xyz file created automatically from geometry.in.

|    |             |             |             |
|----|-------------|-------------|-------------|
| Os | 8.90975420  | 8.86077436  | 8.56934924  |
| C  | 7.03086100  | 7.92364283  | 10.74702191 |
| C  | 8.84597024  | 7.27613581  | 7.34479036  |
| C  | 7.73200946  | 6.41123824  | 7.44427556  |
| H  | 6.94039109  | 6.64745851  | 8.15905904  |
| C  | 7.56889268  | 5.26577797  | 6.64929289  |
| C  | 8.59195718  | 4.96055776  | 5.72656461  |
| C  | 9.68632705  | 5.83546884  | 5.58868727  |
| H  | 10.44998431 | 5.58957003  | 4.84644459  |
| C  | 10.99292307 | 7.92402418  | 6.06857961  |
| H  | 11.51356934 | 8.23719371  | 6.98476558  |
| H  | 10.64502267 | 8.84350657  | 5.57425630  |
| H  | 11.72603600 | 7.44058887  | 5.40877777  |
| C  | 9.83254242  | 6.99808749  | 6.35046828  |
| C  | 6.32583922  | 4.42676134  | 6.79587272  |
| H  | 5.48990386  | 5.03389022  | 7.16786258  |
| H  | 6.47353224  | 3.60252909  | 7.51209753  |
| H  | 6.04423943  | 3.97919630  | 5.83205134  |
| C  | 4.30799758  | 11.29189489 | 10.23261743 |
| H  | 4.68607069  | 11.97772574 | 9.46385355  |
| H  | 3.29937341  | 10.96369085 | 9.93375559  |
| H  | 4.19281883  | 11.85707671 | 11.17134895 |
| H  | 14.49367579 | 6.73925900  | 9.97419776  |
| H  | 13.59999466 | 5.80648322  | 11.18268935 |
| C  | 10.73039685 | 9.72684757  | 10.82040988 |
| C  | 10.49293073 | 8.76895148  | 9.79087523  |
| C  | 11.40271103 | 7.69420023  | 9.66049981  |
| H  | 11.21451846 | 6.92691550  | 8.90599786  |
| C  | 12.54564391 | 7.55302924  | 10.45514006 |
| C  | 12.79019603 | 8.53670408  | 11.44146742 |
| C  | 11.87724833 | 9.59202463  | 11.60965013 |
| H  | 12.04905783 | 10.34004919 | 12.38501430 |

|   |             |             |             |
|---|-------------|-------------|-------------|
| C | 9.76981475  | 10.85461615 | 11.12101342 |
| H | 9.45158919  | 11.38572868 | 10.21256322 |
| C | 13.48623689 | 6.39322533  | 10.25687006 |
| H | 8.85642872  | 10.47236053 | 11.60052367 |
| H | 10.22727058 | 11.58903810 | 11.79800203 |
| C | 5.23581457  | 10.11873671 | 10.41045649 |
| C | 9.04976295  | 10.47060017 | 7.38646824  |
| C | 10.15867583 | 11.33311156 | 7.55595234  |
| H | 10.90566734 | 11.09620867 | 8.31646612  |
| C | 10.36198311 | 12.48402474 | 6.78755666  |
| C | 9.40503022  | 12.79186368 | 5.79272911  |
| C | 8.31119113  | 11.93182686 | 5.59172553  |
| H | 7.58210238  | 12.15412685 | 4.81105947  |
| C | 6.95772563  | 9.86527656  | 6.01211244  |
| H | 6.38422736  | 9.56866817  | 6.90215293  |
| H | 7.31421260  | 8.93666538  | 5.54171744  |
| H | 6.26619029  | 10.35578432 | 5.31359131  |
| C | 8.11731173  | 10.77312322 | 6.35144896  |
| C | 11.56247057 | 13.36341070 | 7.02136394  |
| H | 12.20313641 | 12.94819184 | 7.80979642  |
| H | 11.26259049 | 14.38020192 | 7.32259402  |
| H | 12.16699346 | 13.46835825 | 6.10624193  |
| C | 4.96720937  | 9.10878167  | 11.36355696 |
| C | 5.86863868  | 8.04141586  | 11.51619951 |
| H | 5.67549284  | 7.26934533  | 12.26249317 |
| C | 7.97779045  | 6.77994694  | 11.03109794 |
| H | 8.31011051  | 6.27571290  | 10.11241229 |
| H | 8.88410657  | 7.14019784  | 11.54028006 |
| H | 7.50187659  | 6.02799660  | 11.67538907 |
| H | 13.12134115 | 5.72300124  | 9.46814927  |
| C | 7.29655472  | 8.91263650  | 9.75488622  |
| C | 6.39373731  | 9.99459449  | 9.63447078  |
| H | 6.60248389  | 10.78390395 | 8.90848225  |
| S | 8.52126616  | 3.55887217  | 4.62351283  |
| S | 14.26171956 | 8.34890231  | 12.40941443 |
| S | 3.48347615  | 9.28245218  | 12.31539656 |
| S | 9.67936661  | 14.26891810 | 4.85521460  |
| C | 3.50238572  | 7.83925704  | 13.41052625 |
| H | 2.59066860  | 7.92773760  | 14.01428441 |
| H | 3.46426452  | 6.89995192  | 12.84411407 |
| H | 4.37334770  | 7.84969527  | 14.07843780 |
| C | 8.29255461  | 14.30604609 | 3.68950326  |
| H | 8.44413428  | 15.21587382 | 3.09566811  |
| H | 8.30514220  | 13.43735539 | 3.01901864  |
| H | 7.32834953  | 14.37662091 | 4.20874261  |
| C | 8.65058437  | 2.14339324  | 5.77013566  |

|   |             |             |             |
|---|-------------|-------------|-------------|
| H | 8.72618557  | 1.25246851  | 5.13308576  |
| H | 9.55612224  | 2.22741251  | 6.38279215  |
| H | 7.76553818  | 2.04776803  | 6.41051383  |
| C | 14.22837685 | 9.77537816  | 13.52623487 |
| H | 15.14732032 | 9.69317429  | 14.12016366 |
| H | 14.24766989 | 10.72238795 | 12.97178012 |
| H | 13.36363947 | 9.74309793  | 14.20131251 |

**34\_FHI-aims\_Molecule\_Os2.xyz ///** -591429.938924243 eV

125

# xyz file created automatically from geometry.in.

|    |             |             |             |
|----|-------------|-------------|-------------|
| Os | 8.90149632  | 8.84413334  | 8.70333636  |
| C  | 6.93360248  | 8.00455442  | 10.86099975 |
| C  | 8.91109137  | 7.26431644  | 7.47424884  |
| C  | 7.84863715  | 6.33797132  | 7.52866391  |
| H  | 7.01254614  | 6.53304118  | 8.20482321  |
| C  | 7.79284658  | 5.17946019  | 6.73620211  |
| C  | 8.85908566  | 4.93090215  | 5.84111502  |
| C  | 9.89503346  | 5.88507657  | 5.75006652  |
| H  | 10.71292501 | 5.69096123  | 5.05036955  |
| C  | 11.07153191 | 8.03428169  | 6.28808547  |
| H  | 11.53797442 | 8.37058559  | 7.22510411  |
| H  | 10.69965090 | 8.93604320  | 5.77880287  |
| H  | 11.85687249 | 7.58998125  | 5.66162342  |
| C  | 9.94960723  | 7.04783492  | 6.51884687  |
| C  | 6.58098750  | 4.28266412  | 6.84642150  |
| H  | 5.70084350  | 4.86829804  | 7.14504790  |
| H  | 6.71785221  | 3.49708382  | 7.60647776  |
| H  | 6.35809870  | 3.78041066  | 5.89612834  |
| C  | 4.39156490  | 11.48511789 | 10.12273968 |
| H  | 4.51463049  | 11.77807732 | 9.07141573  |
| H  | 3.32860356  | 11.28001476 | 10.30607999 |
| H  | 4.66361343  | 12.35934658 | 10.73509551 |
| H  | 14.34051948 | 6.37023175  | 10.63330595 |
| H  | 12.98861192 | 5.27971315  | 10.97351038 |
| C  | 10.68496539 | 9.61490333  | 11.04356779 |
| C  | 10.44249281 | 8.70076302  | 9.97514925  |
| C  | 11.30697640 | 7.59308387  | 9.83451098  |
| H  | 11.12685066 | 6.87935354  | 9.02817284  |
| C  | 12.40519740 | 7.35656856  | 10.67527923 |
| C  | 12.65286275 | 8.27327868  | 11.72234299 |
| C  | 11.78708594 | 9.37809415  | 11.86786620 |
| H  | 11.97034337 | 10.06925480 | 12.69559057 |
| C  | 9.76989640  | 10.77745994 | 11.34852780 |
| H  | 9.50843986  | 11.35252162 | 10.44877905 |

|   |             |             |             |
|---|-------------|-------------|-------------|
| C | 13.28982026 | 6.16417560  | 10.39015693 |
| H | 8.82219951  | 10.42543938 | 11.78345850 |
| H | 10.23791186 | 11.46400185 | 12.06702152 |
| C | 5.25470974  | 10.28425919 | 10.43713508 |
| C | 9.00098259  | 10.46231670 | 7.52840560  |
| C | 10.02748746 | 11.40861898 | 7.72939701  |
| H | 10.78153213 | 11.21496638 | 8.49614016  |
| C | 10.15005551 | 12.58739819 | 6.97498798  |
| C | 9.20333836  | 12.82569946 | 5.95268626  |
| C | 8.20159315  | 11.85856678 | 5.72497696  |
| H | 7.47271610  | 12.05085789 | 4.93255020  |
| C | 6.98901333  | 9.69626304  | 6.10256382  |
| H | 6.42259731  | 9.34945487  | 6.97899771  |
| H | 7.41774460  | 8.80097506  | 5.62838750  |
| H | 6.27587727  | 10.14572013 | 5.39811405  |
| C | 8.07249700  | 10.68491921 | 6.46780077  |
| C | 11.30425736 | 13.52012506 | 7.26227748  |
| C | 4.94076423  | 9.35002519  | 11.45007519 |
| C | 5.78352649  | 8.23125323  | 11.61985566 |
| H | 5.54212193  | 7.52200070  | 12.41682018 |
| C | 7.81273374  | 6.82016861  | 11.18795134 |
| H | 8.11470683  | 6.26371984  | 10.28900747 |
| H | 8.73939945  | 7.14462320  | 11.68485700 |
| H | 7.29335171  | 6.12399114  | 11.86028200 |
| H | 13.22492596 | 5.88686596  | 9.32942433  |
| C | 7.25536379  | 8.94769374  | 9.83970042  |
| C | 6.40360485  | 10.06006758 | 9.66279950  |
| H | 6.63848337  | 10.78949014 | 8.88492554  |
| C | 8.94009312  | 3.72442759  | 4.98003456  |
| C | 9.25769877  | 3.83811938  | 3.61458913  |
| C | 9.39199054  | 2.71709109  | 2.79299065  |
| C | 9.21690734  | 1.42945185  | 3.32314672  |
| C | 8.90073408  | 1.29877950  | 4.69003341  |
| C | 8.76333792  | 2.42385571  | 5.49599321  |
| H | 8.77535574  | 0.30368172  | 5.12213671  |
| H | 8.54727706  | 2.29028035  | 6.55676398  |
| H | 9.62703548  | 2.85881704  | 1.73868740  |
| H | 9.38512916  | 4.83086579  | 3.17824396  |
| S | 9.35565419  | -0.07176727 | 2.39742800  |
| C | 9.90417628  | 0.48352716  | 0.76226448  |
| H | 10.03532195 | -0.43481375 | 0.17686960  |
| H | 10.86524440 | 1.01029306  | 0.82000457  |
| H | 9.14970982  | 1.11149550  | 0.27151134  |
| C | 3.76730105  | 9.49783535  | 12.34854653 |
| C | 2.86315970  | 8.43247949  | 12.53903625 |
| C | 1.77907927  | 8.54646756  | 13.40399296 |

|   |             |             |             |
|---|-------------|-------------|-------------|
| C | 1.56140969  | 9.73751596  | 14.12472605 |
| C | 3.53772427  | 10.67883622 | 13.07514928 |
| C | 2.45830050  | 10.80353964 | 13.95215922 |
| H | 2.32975239  | 11.73481875 | 14.50285564 |
| H | 3.00637354  | 7.50464949  | 11.98159347 |
| H | 4.23345892  | 11.51350276 | 12.97663962 |
| H | 1.08824983  | 7.70917284  | 13.52188368 |
| S | 0.15429395  | 9.76823650  | 15.19684385 |
| C | 0.22991100  | 11.41426423 | 15.95066927 |
| H | -0.63151581 | 11.45989889 | 16.62830303 |
| H | 0.13208075  | 12.20761193 | 15.19848899 |
| H | 1.14938427  | 11.54931140 | 16.53459999 |
| C | 13.78682245 | 8.12874630  | 12.67022781 |
| C | 14.02728820 | 6.93205272  | 13.36717644 |
| C | 14.64870481 | 9.21478229  | 12.92975988 |
| C | 15.70415437 | 9.10583209  | 13.82949639 |
| C | 15.93491312 | 7.89817892  | 14.51769102 |
| C | 15.07895692 | 6.81145677  | 14.27816012 |
| H | 15.21866939 | 5.86639235  | 14.80217009 |
| H | 13.36232201 | 6.08045685  | 13.21746163 |
| H | 14.49698290 | 10.15504921 | 12.39610804 |
| H | 16.36400143 | 9.95913781  | 13.99913617 |
| S | 17.30599497 | 7.87610449  | 15.63555735 |
| C | 17.27431988 | 6.19817768  | 16.31844855 |
| H | 18.11934206 | 6.15590585  | 17.01667462 |
| H | 17.42175576 | 5.44216176  | 15.53637069 |
| H | 16.34606440 | 6.00428038  | 16.87100122 |
| C | 9.21642761  | 14.03061132 | 5.08474879  |
| C | 9.12725253  | 13.89933614 | 3.68736731  |
| C | 9.07724102  | 15.01209985 | 2.84536388  |
| C | 9.10702003  | 16.30729675 | 3.38562290  |
| C | 9.19839335  | 16.45536720 | 4.78402302  |
| C | 9.25574015  | 15.33808142 | 5.61146044  |
| H | 9.11091696  | 12.90038249 | 3.24648213  |
| H | 9.01779787  | 14.85847734 | 1.76863224  |
| H | 9.21034221  | 17.45558251 | 5.22201850  |
| H | 9.29712333  | 15.48209481 | 6.69205243  |
| S | 9.02990542  | 17.79643342 | 2.43320388  |
| C | 8.90380599  | 17.20121349 | 0.72682678  |
| H | 8.84147472  | 18.10636184 | 0.11033618  |
| H | 7.99686477  | 16.60283413 | 0.57338668  |
| H | 9.79510312  | 16.63246105 | 0.43288923  |
| H | 11.65822814 | 14.02207176 | 6.35204883  |
| H | 12.14337833 | 12.96520709 | 7.70303658  |
| H | 11.02506893 | 14.30778599 | 7.97997102  |

35\_FHI-aims\_Molecule\_Os3.xyz /// -616572.512776929 eV

165

# xyz file created automatically from geometry.in.

|    |             |             |             |
|----|-------------|-------------|-------------|
| Os | 8.91682219  | 8.74315871  | 8.55649843  |
| C  | 7.05132307  | 7.92221336  | 10.80676794 |
| C  | 8.91304582  | 7.13697996  | 7.36337473  |
| C  | 7.92344858  | 6.14922006  | 7.54801160  |
| H  | 7.13172449  | 6.32392680  | 8.28011760  |
| C  | 7.88848081  | 4.94738751  | 6.82191067  |
| C  | 8.88488231  | 4.73177060  | 5.84307135  |
| C  | 9.83580363  | 5.74882984  | 5.61361633  |
| H  | 10.59584067 | 5.57826753  | 4.84568736  |
| C  | 10.91741907 | 7.98546120  | 5.97916504  |
| H  | 11.46360766 | 8.35093362  | 6.86123410  |
| H  | 10.45021676 | 8.86514146  | 5.51216663  |
| H  | 11.65350259 | 7.57667050  | 5.27380533  |
| C  | 9.88011312  | 6.94428182  | 6.33157925  |
| C  | 6.77071681  | 3.96655256  | 7.09324447  |
| H  | 5.88414905  | 4.49433941  | 7.46979560  |
| H  | 7.05398628  | 3.22461085  | 7.85648594  |
| H  | 6.48793189  | 3.41069606  | 6.18982814  |
| C  | 4.36168928  | 11.27893690 | 10.01634400 |
| H  | 4.41018468  | 11.50610159 | 8.94282226  |
| H  | 3.31784447  | 11.06550563 | 10.28037298 |
| H  | 4.65238912  | 12.19581620 | 10.55283437 |
| H  | 14.58603480 | 6.59644352  | 10.24112663 |
| H  | 13.31908773 | 5.40501878  | 10.57167146 |
| C  | 10.71674158 | 9.55488405  | 10.85743178 |
| C  | 10.50404350 | 8.65158500  | 9.77300560  |
| C  | 11.44315423 | 7.61742833  | 9.56941535  |
| H  | 11.28404373 | 6.91028280  | 8.75278094  |
| C  | 12.58864602 | 7.44473458  | 10.36243212 |
| C  | 12.80661480 | 8.35262810  | 11.42370110 |
| C  | 11.86475368 | 9.38262576  | 11.63202765 |
| H  | 12.02701328 | 10.06474636 | 12.47123873 |
| C  | 9.73330491  | 10.63976410 | 11.23043876 |
| H  | 9.39093991  | 11.21601672 | 10.35912218 |
| C  | 13.54605432 | 6.32760605  | 10.01451299 |
| H  | 8.83396581  | 10.21141645 | 11.69746231 |
| H  | 10.18404300 | 11.34154400 | 11.94541248 |
| C  | 5.27363011  | 10.11949280 | 10.34740963 |
| C  | 8.97126532  | 10.38335373 | 7.41055836  |
| C  | 9.96131545  | 11.35682944 | 7.65836614  |
| H  | 10.72273052 | 11.15689520 | 8.41556844  |
| C  | 10.03198578 | 12.57615183 | 6.96526873  |

|   |             |             |             |
|---|-------------|-------------|-------------|
| C | 9.07585757  | 12.82463785 | 5.95501893  |
| C | 8.12376793  | 11.82518266 | 5.66446841  |
| H | 7.39570540  | 12.02272982 | 4.87231320  |
| C | 7.00612565  | 9.59238015  | 5.94251971  |
| H | 6.42253396  | 9.22016840  | 6.79773163  |
| H | 7.47847117  | 8.71412594  | 5.47812137  |
| H | 6.30179804  | 10.02255353 | 5.21766015  |
| C | 8.04234064  | 10.61296235 | 6.35193977  |
| C | 11.14362004 | 13.54284474 | 7.30311070  |
| C | 5.03524953  | 9.22384230  | 11.41438442 |
| C | 5.92266778  | 8.14270827  | 11.59867238 |
| H | 5.73897701  | 7.46392772  | 12.43639504 |
| C | 7.98863884  | 6.79035221  | 11.15885959 |
| H | 8.29944068  | 6.21175810  | 10.27742259 |
| H | 8.90926416  | 7.17335757  | 11.62435026 |
| H | 7.51355931  | 6.09915621  | 11.86820537 |
| H | 13.47417879 | 6.08350758  | 8.94607051  |
| C | 7.29890134  | 8.82904686  | 9.73287745  |
| C | 6.39796885  | 9.89804159  | 9.53749006  |
| H | 6.57751040  | 10.60123872 | 8.72180770  |
| C | 8.97348762  | 3.48868750  | 5.03455911  |
| C | 9.09100249  | 3.54811980  | 3.63218897  |
| C | 9.21159461  | 2.38921345  | 2.86673719  |
| C | 9.22934904  | 1.11550356  | 3.46834604  |
| C | 9.12429632  | 1.05788123  | 4.87209218  |
| C | 8.99429249  | 2.21582755  | 5.63582813  |
| H | 9.18205871  | 0.09093227  | 5.37526378  |
| H | 8.94936656  | 2.13610201  | 6.72306744  |
| H | 9.25752120  | 2.47086087  | 1.77916794  |
| H | 9.05650742  | 4.51974209  | 3.13519613  |
| C | 3.90041707  | 9.38022135  | 12.35959650 |
| C | 3.05070337  | 8.29756545  | 12.65720124 |
| C | 2.00141197  | 8.43014959  | 13.56561007 |
| C | 3.65948651  | 10.59876369 | 13.02208320 |
| C | 2.61453064  | 10.73041337 | 13.93340118 |
| H | 2.44340836  | 11.69575340 | 14.41338420 |
| H | 3.21294112  | 7.34022546  | 12.15772695 |
| H | 4.31197201  | 11.45182462 | 12.83100836 |
| H | 1.37230583  | 7.56547006  | 13.78562806 |
| C | 13.98198598 | 8.28451882  | 12.32899105 |
| C | 14.36088380 | 7.09428277  | 12.97903613 |
| C | 14.73552893 | 9.44285818  | 12.60246922 |
| C | 15.81744354 | 9.41250457  | 13.47962891 |
| C | 16.19660477 | 8.22181283  | 14.12957772 |
| C | 15.44148348 | 7.06380193  | 13.85894732 |
| H | 15.71673069 | 6.11936584  | 14.33181159 |

|   |             |             |             |
|---|-------------|-------------|-------------|
| H | 13.78798296 | 6.18206225  | 12.80770857 |
| H | 14.46788409 | 10.38002077 | 12.11028741 |
| H | 16.36418586 | 10.33459503 | 13.68527390 |
| C | 9.04098157  | 14.08873791 | 5.17473134  |
| C | 9.04457150  | 14.06819157 | 3.76704025  |
| C | 8.99672190  | 15.24863872 | 3.02645287  |
| C | 8.93244526  | 16.50487234 | 3.66052920  |
| C | 8.90934264  | 16.52274626 | 5.06918214  |
| C | 8.96731565  | 15.34342119 | 5.80834437  |
| H | 9.12034126  | 13.10989844 | 3.24926015  |
| H | 9.04762460  | 15.19764052 | 1.93732380  |
| H | 8.81082514  | 17.47565841 | 5.59222344  |
| H | 8.91941826  | 15.39141393 | 6.89744548  |
| H | 11.46929301 | 14.11265300 | 6.42317889  |
| H | 12.00916160 | 13.00213843 | 7.70920235  |
| H | 10.83133488 | 14.27415600 | 8.06532040  |
| C | 17.34087465 | 8.19425980  | 15.06765165 |
| C | 17.32294570 | 7.38473008  | 16.22270132 |
| C | 18.38912831 | 7.36943274  | 17.11441355 |
| C | 19.52837141 | 8.16599437  | 16.88313733 |
| C | 19.56454592 | 8.97092883  | 15.73340236 |
| C | 18.48567617 | 8.98074620  | 14.84803260 |
| H | 16.44107073 | 6.78031022  | 16.44312646 |
| H | 18.33850452 | 6.74535246  | 18.00910319 |
| H | 20.43498187 | 9.58786656  | 15.51305329 |
| H | 18.54998843 | 9.59646403  | 13.94897610 |
| C | 0.64546045  | 9.80126828  | 15.18848509 |
| C | -0.59502836 | 9.16154056  | 14.98443508 |
| C | -1.64738566 | 9.32087249  | 15.87912291 |
| C | -1.49832334 | 10.12720962 | 17.02544117 |
| C | -0.26568754 | 10.76197801 | 17.24703313 |
| C | 0.78135805  | 10.59835227 | 16.33896079 |
| C | 1.75834141  | 9.65070870  | 14.22481004 |
| H | -0.74817528 | 8.55682649  | 14.08874031 |
| H | -2.60345500 | 8.83109346  | 15.68422277 |
| H | -0.10779741 | 11.37939583 | 18.13060572 |
| H | 1.73728408  | 11.08226758 | 16.54680056 |
| C | 8.89769706  | 17.76318053 | 2.88204721  |
| C | 8.22610189  | 17.84861804 | 1.64442898  |
| C | 8.19477465  | 19.03359694 | 0.91742085  |
| C | 8.84077404  | 20.18906565 | 1.40127461  |
| C | 9.51520583  | 20.11886363 | 2.63066918  |
| C | 9.53784123  | 18.92416092 | 3.35140017  |
| H | 7.69312674  | 16.97767923 | 1.25876535  |
| H | 7.65557439  | 19.07404972 | -0.03129621 |
| H | 10.03673670 | 20.98779719 | 3.03046534  |

|   |             |             |             |
|---|-------------|-------------|-------------|
| H | 10.09372961 | 18.88852548 | 4.29005849  |
| C | 9.35148354  | -0.11782845 | 2.65962539  |
| C | 8.68447496  | -1.29977002 | 3.02735670  |
| C | 8.78953814  | -2.46895366 | 2.27244525  |
| C | 9.57966372  | -2.49218588 | 1.11219398  |
| C | 10.25570332 | -1.31549569 | 0.73231090  |
| C | 10.14022028 | -0.15644659 | 1.49091395  |
| H | 8.04141425  | -1.30120969 | 3.90929975  |
| H | 8.24198403  | -3.35526120 | 2.59127256  |
| H | 10.88919597 | -1.31957531 | -0.15713549 |
| H | 10.69877260 | 0.73082224  | 1.18769394  |
| S | 9.79842198  | -3.90053891 | 0.06616025  |
| C | 8.85790817  | -5.20538025 | 0.89982608  |
| H | 8.99698783  | -6.09935755 | 0.27955801  |
| H | 7.78750495  | -4.96769938 | 0.94435982  |
| H | 9.25051079  | -5.40502787 | 1.90498172  |
| S | 20.81944943 | 8.06534596  | 18.08708018 |
| C | 22.04884461 | 9.25868287  | 17.49838466 |
| H | 22.84918388 | 9.23890084  | 18.24828380 |
| H | 21.63290436 | 10.27305000 | 17.44837111 |
| H | 22.46551095 | 8.96495318  | 16.52669679 |
| S | 8.74044500  | 21.63510680 | 0.38877667  |
| C | 9.59585307  | 22.89897116 | 1.36542506  |
| H | 9.52704684  | 23.81740720 | 0.76955944  |
| H | 10.65466605 | 22.65056204 | 1.51362932  |
| H | 9.09997318  | 23.06306612 | 2.33052253  |
| S | -2.90431886 | 10.25552994 | 18.09010081 |
| C | -2.37570406 | 11.44166327 | 19.35365298 |
| H | -3.24651287 | 11.57097649 | 20.00793091 |
| H | -2.11635432 | 12.41114262 | 18.90968305 |
| H | -1.53915570 | 11.05476438 | 19.94923253 |

**36\_FHI-aims\_Molecule\_Si1.xyz ///** -80899.498231165 eV

61

# xyz file created automatically from geometry.in.

|    |             |            |             |
|----|-------------|------------|-------------|
| Si | 9.10870003  | 8.88775035 | 8.53925315  |
| C  | 7.48899895  | 8.11611843 | 10.78069387 |
| C  | 8.99803911  | 7.34838133 | 7.44386935  |
| C  | 8.09190603  | 6.31116458 | 7.72846754  |
| H  | 7.42905183  | 6.39436984 | 8.59280256  |
| C  | 7.99284525  | 5.17135965 | 6.92572013  |
| C  | 8.81219627  | 5.03606309 | 5.79443806  |
| C  | 9.72762267  | 6.06408932 | 5.48914041  |
| H  | 10.36441757 | 5.97524067 | 4.60603071  |
| C  | 9.81159397  | 7.19402741 | 6.29887550  |

|   |             |             |             |
|---|-------------|-------------|-------------|
| C | 10.64587040 | 9.56841279  | 10.86377741 |
| C | 10.62885967 | 8.83144447  | 9.66433320  |
| C | 11.78625146 | 8.08824412  | 9.35234646  |
| H | 11.81741186 | 7.48620686  | 8.44084023  |
| C | 12.89914903 | 8.08315592  | 10.18955383 |
| C | 12.89590476 | 8.82855592  | 11.38556031 |
| C | 11.75360038 | 9.57478895  | 11.71548297 |
| H | 11.71384488 | 10.15719733 | 12.63568077 |
| C | 5.35720344  | 9.81193619  | 10.20961591 |
| C | 9.17932139  | 10.40870992 | 7.41849572  |
| C | 9.95519849  | 11.54189114 | 7.74090243  |
| H | 10.57442351 | 11.53680818 | 8.64133404  |
| C | 9.96719428  | 12.67433761 | 6.93108414  |
| C | 9.19473768  | 12.71648412 | 5.75346768  |
| C | 8.41957593  | 11.59696902 | 5.41089830  |
| H | 7.81680262  | 11.59287984 | 4.50297342  |
| C | 8.42055247  | 10.46767588 | 6.23434775  |
| C | 5.27566078  | 8.94945095  | 11.32071286 |
| C | 6.35853980  | 8.10040734  | 11.60172065 |
| H | 6.33238977  | 7.42719008  | 12.45825041 |
| C | 7.58521619  | 8.96128042  | 9.65849417  |
| C | 6.49069038  | 9.81143563  | 9.39921183  |
| H | 6.52650865  | 10.49554568 | 8.54773438  |
| S | 8.77684072  | 3.65503757  | 4.69103437  |
| S | 14.35796541 | 8.74441893  | 12.37670657 |
| S | 3.79021258  | 9.02628121  | 12.27733035 |
| S | 9.28621263  | 14.20433083 | 4.80310576  |
| C | 4.04518099  | 7.77378440  | 13.56100804 |
| H | 3.12822770  | 7.78884660  | 14.16296370 |
| H | 4.16945672  | 6.77310062  | 13.12770325 |
| H | 4.89766752  | 8.02206700  | 14.20589139 |
| C | 8.21077869  | 13.87237919 | 3.38324022  |
| H | 8.25456441  | 14.78246325 | 2.77220858  |
| H | 8.57860215  | 13.02669453 | 2.78856459  |
| H | 7.17211167  | 13.70262228 | 3.69371075  |
| C | 7.48738923  | 2.58766611  | 5.38601393  |
| H | 7.44042211  | 1.72066871  | 4.71559714  |
| H | 7.74931252  | 2.24338161  | 6.39454116  |
| H | 6.51031958  | 3.08721364  | 5.39126641  |
| C | 13.95203852 | 9.75803100  | 13.82275109 |
| H | 14.84655353 | 9.72257023  | 14.45700993 |
| H | 13.75654566 | 10.80101722 | 13.54315470 |
| H | 13.10317491 | 9.34216583  | 14.38052491 |
| H | 8.32062136  | 7.45290146  | 11.03437303 |
| H | 4.52623945  | 10.48388125 | 9.98359635  |
| H | 13.77820707 | 7.49168865  | 9.92386574  |

|   |             |             |             |
|---|-------------|-------------|-------------|
| H | 10.51557250 | 7.98247121  | 6.01908860  |
| H | 7.26935663  | 4.39931887  | 7.18616295  |
| H | 7.81762742  | 9.60716518  | 5.93214323  |
| H | 10.58278536 | 13.53413066 | 7.20503160  |
| H | 9.76538816  | 10.14579865 | 11.15792907 |

**37\_FHI-aims\_Molecule\_Si2.xyz ///** -106041.994090932 eV

101

# xyz file created automatically from geometry.in.

|    |             |             |             |
|----|-------------|-------------|-------------|
| Si | 8.91100222  | 8.81544315  | 8.74028177  |
| C  | 7.12014286  | 8.03943904  | 10.85642269 |
| C  | 8.86817166  | 7.30870601  | 7.59531167  |
| C  | 7.94051178  | 6.25729671  | 7.71457056  |
| H  | 7.16439447  | 6.30300653  | 8.48259234  |
| C  | 7.97241460  | 5.15893234  | 6.85164598  |
| C  | 8.94011425  | 5.06212980  | 5.83300037  |
| C  | 9.86937158  | 6.11404607  | 5.70897265  |
| H  | 10.64783531 | 6.05700328  | 4.94566162  |
| C  | 9.82774505  | 7.21210943  | 6.56576099  |
| C  | 10.51193414 | 9.55448719  | 11.01338678 |
| C  | 10.38192612 | 8.66757766  | 9.92417018  |
| C  | 11.35353587 | 7.65730812  | 9.79390532  |
| H  | 11.29096445 | 6.94826921  | 8.96534494  |
| C  | 12.39946375 | 7.53298697  | 10.70976065 |
| C  | 12.52186514 | 8.41798251  | 11.79719131 |
| C  | 11.56082180 | 9.43998765  | 11.92573720 |
| H  | 11.61325198 | 10.12255894 | 12.77648831 |
| C  | 5.31659068  | 10.12609636 | 10.48275619 |
| C  | 9.05557615  | 10.34181415 | 7.62967023  |
| C  | 9.98282864  | 11.37808164 | 7.84556781  |
| H  | 10.68980100 | 11.30899378 | 8.67593754  |
| C  | 10.03900049 | 12.49031699 | 7.00230164  |
| C  | 9.16305731  | 12.61723621 | 5.90702477  |
| C  | 8.23320596  | 11.58155461 | 5.68687222  |
| H  | 7.52160045  | 11.66268782 | 4.86279001  |
| C  | 8.18743930  | 10.46899704 | 6.52508510  |
| C  | 5.09547967  | 9.21800480  | 11.53500048 |
| C  | 6.01400420  | 8.16211245  | 11.69750430 |
| H  | 5.88394948  | 7.45899600  | 12.52276751 |
| C  | 7.35201549  | 8.95262440  | 9.80640112  |
| C  | 6.41984225  | 9.99410712  | 9.63824561  |
| H  | 6.56120850  | 10.72367444 | 8.83755463  |
| C  | 8.98836900  | 3.90149866  | 4.91520532  |
| C  | 9.35090046  | 4.05780566  | 3.56539071  |
| C  | 9.42135266  | 2.97053154  | 2.69366134  |

|   |             |             |             |
|---|-------------|-------------|-------------|
| C | 9.13050997  | 1.67606226  | 3.15338018  |
| C | 8.75974884  | 1.50489859  | 4.50239414  |
| C | 8.68887142  | 2.59710321  | 5.36014689  |
| H | 8.54064286  | 0.50397809  | 4.87961217  |
| H | 8.42833090  | 2.43135851  | 6.40698436  |
| H | 9.69609843  | 3.14377378  | 1.65381359  |
| H | 9.55868038  | 5.05642719  | 3.17690439  |
| S | 9.19085778  | 0.21680148  | 2.15639909  |
| C | 9.78121319  | 0.82021226  | 0.55339088  |
| H | 9.86055763  | -0.07294164 | -0.07843109 |
| H | 10.77187941 | 1.28449688  | 0.63986285  |
| H | 9.06796084  | 1.51690434  | 0.09483507  |
| C | 3.95279481  | 9.38866623  | 12.46061895 |
| C | 3.22034458  | 8.28445869  | 12.94213032 |
| C | 2.15632279  | 8.45131800  | 13.82185273 |
| C | 1.78686725  | 9.73769297  | 14.26354705 |
| C | 3.56988710  | 10.66640178 | 12.90459980 |
| C | 2.50872967  | 10.84619641 | 13.79294043 |
| H | 2.25912688  | 11.85433422 | 14.12198926 |
| H | 3.47496461  | 7.27927654  | 12.60114445 |
| H | 4.13464454  | 11.53986319 | 12.57344181 |
| H | 1.59954052  | 7.57961738  | 14.17146889 |
| S | 0.42452220  | 9.82576572  | 15.38732646 |
| C | 0.30794487  | 11.59037312 | 15.78018540 |
| H | -0.52473495 | 11.67191918 | 16.48966175 |
| H | 0.07536979  | 12.18955833 | 14.89047187 |
| H | 1.22367623  | 11.95611315 | 16.26203490 |
| C | 13.61033010 | 8.26186493  | 12.78838356 |
| C | 14.00764391 | 6.98793305  | 13.23038928 |
| C | 14.27770349 | 9.37884918  | 13.33167901 |
| C | 15.29484981 | 9.22816938  | 14.26783279 |
| C | 15.67976393 | 7.94523013  | 14.70636549 |
| C | 15.02152501 | 6.82423438  | 14.17548219 |
| H | 15.28470036 | 5.81819698  | 14.50028790 |
| H | 13.49164076 | 6.10419537  | 12.85062052 |
| H | 14.01073624 | 10.38190598 | 12.99376532 |
| H | 15.80347244 | 10.10952094 | 14.66377524 |
| S | 16.97985336 | 7.87727165  | 15.90295107 |
| C | 17.13939247 | 6.10879435  | 16.26100379 |
| H | 17.93737931 | 6.03857781  | 17.01046002 |
| H | 17.43779325 | 5.54031136  | 15.37099649 |
| H | 16.21401675 | 5.70003294  | 16.68658886 |
| C | 9.21145989  | 13.79312066 | 5.00919186  |
| C | 8.97451886  | 13.66355910 | 3.62927700  |
| C | 8.99672756  | 14.76577268 | 2.77421261  |
| C | 9.25544990  | 16.04889443 | 3.28188645  |

|   |             |             |             |
|---|-------------|-------------|-------------|
| C | 9.50320909  | 16.19291188 | 4.66174906  |
| C | 9.48349800  | 15.08577052 | 5.50281700  |
| H | 8.79367133  | 12.67395545 | 3.20587545  |
| H | 8.81926484  | 14.61295974 | 1.71031962  |
| H | 9.69728205  | 17.18457750 | 5.07523992  |
| H | 9.64886865  | 15.23012881 | 6.57192811  |
| S | 9.29649425  | 17.52427018 | 2.30876877  |
| C | 8.83302084  | 16.95171261 | 0.65338679  |
| H | 8.81341571  | 17.85543797 | 0.03194010  |
| H | 7.83501345  | 16.49549546 | 0.65135911  |
| H | 9.57580466  | 16.25604066 | 0.24252595  |
| H | 10.79491033 | 13.25865226 | 7.17733111  |
| H | 7.45802856  | 9.68234787  | 6.31365047  |
| H | 10.56003598 | 8.01259437  | 6.42936242  |
| H | 7.21565812  | 4.37802931  | 6.95002446  |
| H | 4.60554646  | 10.93794761 | 10.31641978 |
| H | 7.83479802  | 7.23376220  | 11.04495344 |
| H | 9.76186799  | 10.33384012 | 11.17275873 |
| H | 13.14551303 | 6.74779603  | 10.57144180 |

**38\_FHI-aims\_Molecule\_Si3.xyz ///** -131184.575636874 eV

141

# xyz file created automatically from geometry.in.

|    |             |             |             |
|----|-------------|-------------|-------------|
| Si | 8.93387805  | 8.79884423  | 8.61242825  |
| C  | 7.29597147  | 8.11440206  | 10.89012046 |
| C  | 8.87080938  | 7.27620812  | 7.48951868  |
| C  | 8.11125344  | 6.13660598  | 7.81676995  |
| H  | 7.46332779  | 6.15077063  | 8.69667514  |
| C  | 8.15309518  | 4.98493088  | 7.02986962  |
| C  | 8.95627011  | 4.92379908  | 5.87514072  |
| C  | 9.70059798  | 6.06784376  | 5.53026387  |
| H  | 10.34625938 | 6.04373687  | 4.64985705  |
| C  | 9.65814287  | 7.21605405  | 6.32143018  |
| C  | 10.54265950 | 9.40751876  | 10.93433000 |
| C  | 10.45867676 | 8.67614410  | 9.73144657  |
| C  | 11.55102469 | 7.85143421  | 9.39980261  |
| H  | 11.52699513 | 7.26299284  | 8.47966547  |
| C  | 12.67033551 | 7.75840478  | 10.22704369 |
| C  | 12.74642860 | 8.48563292  | 11.42990477 |
| C  | 11.66071030 | 9.31777278  | 11.76472482 |
| H  | 11.67656342 | 9.86955939  | 12.70689139 |
| C  | 5.24264067  | 9.89646869  | 10.28988526 |
| C  | 9.01405332  | 10.34719301 | 7.52542340  |
| C  | 9.74830828  | 11.48595550 | 7.90927559  |
| H  | 10.35439097 | 11.45928960 | 8.81820850  |

|   |             |             |             |
|---|-------------|-------------|-------------|
| C | 9.73486057  | 12.65158562 | 7.14246459  |
| C | 8.99175679  | 12.72523199 | 5.94911011  |
| C | 8.26803126  | 11.58522462 | 5.55123815  |
| H | 7.66791730  | 11.62107413 | 4.63948419  |
| C | 8.27772868  | 10.42427110 | 6.32540427  |
| C | 5.14576581  | 9.11850176  | 11.45937043 |
| C | 6.19148637  | 8.21608083  | 11.73636962 |
| H | 6.15915323  | 7.61936491  | 12.65030473 |
| C | 7.40569830  | 8.90397730  | 9.72654693  |
| C | 6.34853942  | 9.79109948  | 9.44582383  |
| H | 6.39287222  | 10.42184470 | 8.55482268  |
| C | 9.03026094  | 3.69249393  | 5.05570346  |
| C | 9.10589183  | 3.75070898  | 3.65097114  |
| C | 9.20193884  | 2.59035967  | 2.88611251  |
| C | 9.23333920  | 1.31756133  | 3.48999361  |
| C | 9.15157209  | 1.26121532  | 4.89533599  |
| C | 9.04814311  | 2.42077771  | 5.65972372  |
| H | 9.21360926  | 0.29463137  | 5.39834287  |
| H | 9.02871394  | 2.34468640  | 6.74830223  |
| H | 9.21957822  | 2.66916349  | 1.79767982  |
| H | 9.05388823  | 4.71931192  | 3.15036037  |
| C | 4.00012930  | 9.26763139  | 12.38650696 |
| C | 3.46648213  | 8.16500703  | 13.08086653 |
| C | 2.40696633  | 8.31726528  | 13.97276678 |
| C | 3.41878256  | 10.52885680 | 12.61968352 |
| C | 2.36094558  | 10.68124547 | 13.51211259 |
| H | 1.92385699  | 11.67081139 | 13.65775686 |
| H | 3.88080373  | 7.16989944  | 12.90897900 |
| H | 3.81833485  | 11.40737057 | 12.11000352 |
| H | 2.03215641  | 7.44461967  | 14.51065753 |
| C | 13.92206806 | 8.36288584  | 12.32257174 |
| C | 14.56713903 | 7.12467192  | 12.50567908 |
| C | 14.42982564 | 9.47410483  | 13.02224879 |
| C | 15.53222587 | 9.35375042  | 13.86519313 |
| C | 16.17673502 | 8.11513294  | 14.05050486 |
| C | 15.66695606 | 7.00352434  | 13.35157934 |
| H | 16.15413239 | 6.03252014  | 13.45834854 |
| H | 14.18702489 | 6.23980599  | 11.99192380 |
| H | 13.96151337 | 10.45125470 | 12.89007613 |
| H | 15.88914730 | 10.23098415 | 14.40775704 |
| C | 8.97043365  | 13.96403796 | 5.13781609  |
| C | 9.02818134  | 13.91746810 | 3.73219870  |
| C | 9.00681892  | 15.08415768 | 2.97133798  |
| C | 8.91354843  | 16.35200165 | 3.57917051  |
| C | 8.85157123  | 16.39529292 | 4.98625203  |
| C | 8.88616218  | 15.22997668 | 5.74792831  |

|   |             |             |             |
|---|-------------|-------------|-------------|
| H | 9.13152042  | 12.95279020 | 3.23187823  |
| H | 9.09956347  | 15.01328933 | 1.88627383  |
| H | 8.73506954  | 17.35652793 | 5.48975050  |
| H | 8.80284805  | 15.29644478 | 6.83427671  |
| C | 17.34665901 | 7.98462468  | 14.94698081 |
| C | 17.53086545 | 6.83645385  | 15.74562407 |
| C | 18.62986411 | 6.70851179  | 16.58717067 |
| C | 19.59809148 | 7.72998002  | 16.66050420 |
| C | 19.42831945 | 8.87875756  | 15.87118037 |
| C | 18.31828744 | 8.99742181  | 15.03308109 |
| H | 16.78299331 | 6.04175197  | 15.72656474 |
| H | 18.74073389 | 5.81358253  | 17.20283862 |
| H | 20.16199418 | 9.68383974  | 15.89410864 |
| H | 18.22325492 | 9.88784124  | 14.40879757 |
| C | 0.72075447  | 9.75077767  | 15.17598622 |
| C | -0.28909073 | 8.77562939  | 15.31347040 |
| C | -1.33405424 | 8.93619627  | 16.21594351 |
| C | -1.40978383 | 10.08590351 | 17.02747466 |
| C | -0.40982567 | 11.06357764 | 16.90421897 |
| C | 0.63223975  | 10.89298927 | 15.99148143 |
| C | 1.83237501  | 9.58059341  | 14.21430120 |
| H | -0.27034880 | 7.88825628  | 14.67833536 |
| H | -2.10893471 | 8.17048432  | 16.29024316 |
| H | -0.42783221 | 11.95976463 | 17.52367036 |
| H | 1.41161144  | 11.65517673 | 15.93557225 |
| C | 8.87605707  | 17.59188822 | 2.77283062  |
| C | 8.26241016  | 17.62355496 | 1.50259222  |
| C | 8.21621545  | 18.78971259 | 0.74736216  |
| C | 8.78748255  | 19.98208283 | 1.23571264  |
| C | 9.40564026  | 19.96549868 | 2.49652440  |
| C | 9.44523286  | 18.78849037 | 3.24494960  |
| H | 7.78304357  | 16.72376150 | 1.11298435  |
| H | 7.71988127  | 18.78685751 | -0.22528400 |
| H | 9.87037291  | 20.86443194 | 2.90050380  |
| H | 9.95718420  | 18.79761227 | 4.20894061  |
| C | 9.36083440  | 0.08517103  | 2.68149009  |
| C | 8.71688879  | -1.10738855 | 3.05697873  |
| C | 8.84171884  | -2.27754049 | 2.30675951  |
| C | 9.62816000  | -2.29051557 | 1.14368061  |
| C | 10.27754942 | -1.10198164 | 0.75385368  |
| C | 10.14271658 | 0.05786953  | 1.50762440  |
| H | 8.07868377  | -1.11733724 | 3.94243437  |
| H | 8.31339550  | -3.17342707 | 2.63133835  |
| H | 10.90371389 | -1.09668312 | -0.14070971 |
| H | 10.68147773 | 0.95523630  | 1.19863302  |
| S | 9.87497267  | -3.69979009 | 0.10560995  |

|   |             |             |             |
|---|-------------|-------------|-------------|
| C | 8.97240456  | -5.02244417 | 0.95295202  |
| H | 9.13391428  | -5.91727258 | 0.33924191  |
| H | 7.89605470  | -4.81337062 | 0.99919377  |
| H | 9.37299413  | -5.20306271 | 1.95839357  |
| S | 20.95273018 | 7.45328549  | 17.76237919 |
| C | 21.98456378 | 8.92736074  | 17.55013507 |
| H | 22.84263594 | 8.77560072  | 18.21653425 |
| H | 21.45610944 | 9.83965348  | 17.85438131 |
| H | 22.34715091 | 9.01841472  | 16.51847883 |
| S | 8.67082068  | 21.40178027 | 0.18919448  |
| C | 9.37805292  | 22.73170674 | 1.19656635  |
| H | 9.28944725  | 23.63578161 | 0.58169031  |
| H | 10.43886274 | 22.55458548 | 1.41394452  |
| H | 8.81265526  | 22.87366688 | 2.12656106  |
| S | -2.78366407 | 10.17887355 | 18.13620607 |
| C | -2.53651477 | 11.75471986 | 18.99489661 |
| H | -3.38159661 | 11.83847040 | 19.68927875 |
| H | -2.56304991 | 12.60273429 | 18.29881300 |
| H | -1.60214112 | 11.75757758 | 19.57057559 |
| H | 8.10367602  | 7.42983286  | 11.16229521 |
| H | 4.43434038  | 10.58356375 | 10.03207256 |
| H | 7.69755702  | 9.56173096  | 5.98736041  |
| H | 10.33397623 | 13.50981043 | 7.45426913  |
| H | 7.53356645  | 4.12661905  | 7.29809050  |
| H | 10.25639353 | 8.08118512  | 6.02382126  |
| H | 13.50786033 | 7.12500280  | 9.92839477  |
| H | 9.70692297  | 10.03920671 | 11.24643195 |

**39\_FHI-aims\_Molecule\_C1.xyz ///** -74034.593620248 eV

61

# xyz file created automatically from geometry.in.

|   |             |            |             |
|---|-------------|------------|-------------|
| C | 9.10499136  | 8.87354668 | 8.54725309  |
| C | 7.75215050  | 8.05453570 | 10.54865038 |
| C | 9.01276072  | 7.62115361 | 7.63264042  |
| C | 8.03973417  | 6.62666012 | 7.78014537  |
| H | 7.28807391  | 6.70960277 | 8.56399413  |
| C | 7.98451862  | 5.51522777 | 6.93011943  |
| C | 8.91365525  | 5.36646012 | 5.89399967  |
| C | 9.89019858  | 6.36876656 | 5.72086693  |
| H | 10.61776893 | 6.28456616 | 4.91088223  |
| C | 9.92762837  | 7.47035929 | 6.56837773  |
| C | 10.45291494 | 9.70546841 | 10.54888595 |
| C | 10.34588243 | 8.79775049 | 9.47923873  |
| C | 11.37079226 | 7.84826507 | 9.34320503  |
| H | 11.32566639 | 7.10305443 | 8.54974629  |

|   |             |             |             |
|---|-------------|-------------|-------------|
| C | 12.45321077 | 7.81301294  | 10.22389653 |
| C | 12.55195944 | 8.73340510  | 11.28147551 |
| C | 11.53210695 | 9.68727275  | 11.43307386 |
| H | 11.56244264 | 10.41432552 | 12.24393321 |
| C | 5.70601534  | 9.88397054  | 10.15018895 |
| C | 9.18658137  | 10.10980117 | 7.60915242  |
| C | 10.11997056 | 11.14680957 | 7.76676781  |
| H | 10.85467762 | 11.10400368 | 8.56993912  |
| C | 10.14910315 | 12.23959521 | 6.89963007  |
| C | 9.23831551  | 12.33789041 | 5.83368049  |
| C | 8.30839009  | 11.30080168 | 5.65317581  |
| H | 7.59434471  | 11.32735714 | 4.83047041  |
| C | 8.29602658  | 10.21041288 | 6.52454499  |
| C | 5.59817899  | 8.95951336  | 11.20333072 |
| C | 6.64484843  | 8.04289616  | 11.39683210 |
| H | 6.61040232  | 7.31769448  | 12.20913131 |
| C | 7.86040014  | 8.95520865  | 9.47339535  |
| C | 6.81626465  | 9.87716033  | 9.30365298  |
| H | 6.86473780  | 10.61678442 | 8.50503656  |
| S | 8.95026354  | 4.00774459  | 4.76146894  |
| S | 13.96363417 | 8.59026375  | 12.33927713 |
| S | 4.13837189  | 9.04235615  | 12.20128274 |
| S | 9.36385201  | 13.77474339 | 4.80758506  |
| C | 4.40247386  | 7.75041833  | 13.44399210 |
| H | 3.51318088  | 7.78286350  | 14.08537191 |
| H | 4.47342393  | 6.75534881  | 12.98605641 |
| H | 5.29001252  | 7.95578428  | 14.05622588 |
| C | 8.09707306  | 13.51063185 | 3.53947521  |
| H | 8.16583218  | 14.38575961 | 2.88158006  |
| H | 8.29866864  | 12.60681503 | 2.95042368  |
| H | 7.08971592  | 13.47119320 | 3.97324798  |
| C | 7.58061122  | 2.96142937  | 5.32154738  |
| H | 7.58306746  | 2.09657205  | 4.64694606  |
| H | 7.73678573  | 2.61174468  | 6.35010301  |
| H | 6.61587327  | 3.47755040  | 5.23390665  |
| C | 13.69054144 | 9.86939700  | 13.59268009 |
| H | 14.54753259 | 9.79037058  | 14.27296337 |
| H | 13.67911575 | 10.87446308 | 13.15210872 |
| H | 12.76866021 | 9.68746566  | 14.15991794 |
| H | 8.55778745  | 7.34174258  | 10.73461038 |
| H | 4.91521389  | 10.62036301 | 9.99175952  |
| H | 13.22606032 | 7.05231715  | 10.09311745 |
| H | 10.67922258 | 8.24227707  | 6.39202485  |
| H | 7.19999626  | 4.77591283  | 7.08737287  |
| H | 7.57784616  | 9.40839771  | 6.34330392  |
| H | 10.89558499 | 13.02278815 | 7.04865928  |

H 9.66149457 10.43998305 10.71034782

**40\_FHI-aims\_Molecule\_C2.xyz ///** -99177.166157066 eV

101

# xyz file created automatically from geometry.in.

|   |             |             |             |
|---|-------------|-------------|-------------|
| C | 8.93721315  | 8.80092377  | 8.73299032  |
| C | 7.46099835  | 7.95841434  | 10.64353560 |
| C | 8.87541938  | 7.57604900  | 7.78113447  |
| C | 7.88648560  | 6.58476116  | 7.83358503  |
| H | 7.07894721  | 6.65777891  | 8.56156912  |
| C | 7.89614611  | 5.50337467  | 6.94533025  |
| C | 8.89672944  | 5.36610666  | 5.96840266  |
| C | 9.88083509  | 6.37335302  | 5.90646194  |
| H | 10.68717033 | 6.29569767  | 5.17491029  |
| C | 9.86235790  | 7.45293040  | 6.78323088  |
| C | 10.26129199 | 9.60360105  | 10.76797763 |
| C | 10.13456912 | 8.67370261  | 9.71656972  |
| C | 11.07900985 | 7.63951090  | 9.65765624  |
| H | 11.01699367 | 6.88604978  | 8.87365618  |
| C | 12.10910840 | 7.54298803  | 10.59753472 |
| C | 12.24009425 | 8.47346024  | 11.64133746 |
| C | 11.29090966 | 9.51388413  | 11.70147859 |
| H | 11.33364556 | 10.23688444 | 12.51832016 |
| C | 5.64567333  | 10.03999181 | 10.39036292 |
| C | 9.07228112  | 10.04678257 | 7.81644783  |
| C | 10.05901191 | 11.03062087 | 7.96305287  |
| H | 10.81082132 | 10.93663352 | 8.74617870  |
| C | 10.11867671 | 12.13180337 | 7.10180653  |
| C | 9.19275483  | 12.29751539 | 6.05828675  |
| C | 8.21115646  | 11.29809105 | 5.90212192  |
| H | 7.46071951  | 11.39738991 | 5.11571195  |
| C | 8.16143621  | 10.19846104 | 6.75237237  |
| C | 5.43920932  | 9.09284663  | 11.40630962 |
| C | 6.37077885  | 8.03990039  | 11.50633293 |
| H | 6.26635256  | 7.30179834  | 12.30391524 |
| C | 7.66841182  | 8.90962317  | 9.62470467  |
| C | 6.73610925  | 9.95116021  | 9.52069592  |
| H | 6.85738800  | 10.71941219 | 8.75830682  |
| C | 8.92685093  | 4.21752907  | 5.03537573  |
| C | 9.36342849  | 4.37047396  | 3.70730901  |
| C | 9.42123699  | 3.29143085  | 2.82428551  |
| C | 9.04151732  | 2.00861013  | 3.25061603  |
| C | 8.59426361  | 1.84149221  | 4.57670574  |
| C | 8.53789933  | 2.92541930  | 5.44605916  |
| H | 8.30573903  | 0.84866586  | 4.92820444  |

|   |             |             |             |
|---|-------------|-------------|-------------|
| H | 8.21790811  | 2.76158890  | 6.47665829  |
| H | 9.75647945  | 3.46250070  | 1.80189114  |
| H | 9.64294316  | 5.36112257  | 3.34432976  |
| S | 9.07939528  | 0.55921405  | 2.23816482  |
| C | 9.79120487  | 1.14802458  | 0.68015206  |
| H | 9.86798759  | 0.25744291  | 0.04422729  |
| H | 10.79554851 | 1.56466065  | 0.83103969  |
| H | 9.14048955  | 1.88134479  | 0.18688227  |
| C | 4.30972019  | 9.21855031  | 12.35479495 |
| C | 3.61446385  | 8.08844041  | 12.83219298 |
| C | 2.56318972  | 8.21346070  | 13.73418232 |
| C | 2.16692106  | 9.48274830  | 14.20138917 |
| C | 3.90041892  | 10.47852349 | 12.82579082 |
| C | 2.84977738  | 10.61690318 | 13.73385533 |
| H | 2.57889658  | 11.61338998 | 14.08126661 |
| H | 3.88775187  | 7.09528394  | 12.47085549 |
| H | 4.43549273  | 11.37237554 | 12.49974574 |
| H | 2.03625956  | 7.32203568  | 14.08063001 |
| S | 0.82585968  | 9.51806706  | 15.35337587 |
| C | 0.64179714  | 11.27793230 | 15.74181826 |
| H | -0.18502443 | 11.32841430 | 16.46089981 |
| H | 0.37413018  | 11.86235425 | 14.85227703 |
| H | 1.54686551  | 11.68405588 | 16.21094133 |
| C | 13.31667705 | 8.34904186  | 12.64968617 |
| C | 13.73483204 | 7.08872160  | 13.11208273 |
| C | 13.95885174 | 9.48416687  | 13.18643665 |
| C | 14.97020240 | 9.36407310  | 14.13338700 |
| C | 15.37895353 | 8.09412580  | 14.58766515 |
| C | 14.74628589 | 6.95512389  | 14.06435991 |
| H | 15.02720159 | 5.95776199  | 14.40096642 |
| H | 13.23946997 | 6.18957140  | 12.74115549 |
| H | 13.67827424 | 10.47862638 | 12.83445263 |
| H | 15.45813444 | 10.25997253 | 14.52292175 |
| S | 16.67077931 | 8.06397897  | 15.79497390 |
| C | 16.90686956 | 6.29820774  | 16.12503970 |
| H | 17.70901499 | 6.25083738  | 16.87177940 |
| H | 17.22718025 | 5.75837776  | 15.22478608 |
| H | 16.00187784 | 5.84214897  | 16.54621044 |
| C | 9.23877193  | 13.46642848 | 5.15165416  |
| C | 8.90585701  | 13.34504376 | 3.79083034  |
| C | 8.92477937  | 14.44330483 | 2.93013108  |
| C | 9.27897377  | 15.71351801 | 3.41260986  |
| C | 9.62176125  | 15.84922059 | 4.77288140  |
| C | 9.60253638  | 14.74636539 | 5.61975290  |
| H | 8.64998340  | 12.36440695 | 3.38545811  |
| H | 8.67008754  | 14.29697845 | 1.88107347  |

|   |             |             |             |
|---|-------------|-------------|-------------|
| H | 9.88933224  | 16.83170232 | 5.16724648  |
| H | 9.84230412  | 14.88524975 | 6.67547124  |
| S | 9.33212459  | 17.18292359 | 2.43024442  |
| C | 8.73462052  | 16.63161258 | 0.81179802  |
| H | 8.71347279  | 17.53527518 | 0.19013481  |
| H | 7.71875688  | 16.22126145 | 0.87808651  |
| H | 9.41545905  | 15.90256907 | 0.35407316  |
| H | 10.92346856 | 12.85855928 | 7.22855857  |
| H | 7.39337810  | 9.43941082  | 6.59236524  |
| H | 10.63559893 | 8.21862835  | 6.69726016  |
| H | 7.08902436  | 4.77006215  | 6.99694555  |
| H | 4.93448780  | 10.85854182 | 10.26421211 |
| H | 8.18882030  | 7.15744549  | 10.78613655 |
| H | 9.51834729  | 10.39616641 | 10.87529594 |
| H | 12.83545058 | 6.73352193  | 10.50334158 |

**41\_FHI-aims\_Molecule\_C3.xyz ///** -124319.725560289 eV

141

# xyz file created automatically from geometry.in.

|   |             |             |             |
|---|-------------|-------------|-------------|
| C | 8.96993192  | 8.78735914  | 8.58935790  |
| C | 7.59493255  | 8.04614865  | 10.62170189 |
| C | 8.87134927  | 7.54134251  | 7.66777710  |
| C | 7.98685665  | 6.47910037  | 7.90219266  |
| H | 7.26758136  | 6.53773127  | 8.71811926  |
| C | 7.99583632  | 5.33671055  | 7.09740151  |
| C | 8.88637045  | 5.20846545  | 6.01839030  |
| C | 9.74710386  | 6.29218671  | 5.75646660  |
| H | 10.46021514 | 6.22708192  | 4.93236401  |
| C | 9.73619494  | 7.43000264  | 6.56085777  |
| C | 10.32648138 | 9.51000999  | 10.63987902 |
| C | 10.21177711 | 8.66250524  | 9.51943260  |
| C | 11.24086328 | 7.73367014  | 9.31105653  |
| H | 11.19445057 | 7.04537358  | 8.46843468  |
| C | 12.33926475 | 7.66021352  | 10.17204812 |
| C | 12.45842731 | 8.51181399  | 11.28267298 |
| C | 11.42220061 | 9.44176200  | 11.49697464 |
| H | 11.45676107 | 10.09667904 | 12.36960308 |
| C | 5.59471845  | 9.91112678  | 10.16098923 |
| C | 9.08065030  | 10.05034262 | 7.69105224  |
| C | 9.95811190  | 11.11067796 | 7.95869485  |
| H | 10.66555657 | 11.03925563 | 8.78370998  |
| C | 9.95781348  | 12.26834754 | 7.17635465  |
| C | 9.08391765  | 12.41457128 | 6.08620119  |
| C | 8.23160424  | 11.33310574 | 5.78969037  |
| H | 7.53175767  | 11.41159785 | 4.95541655  |

|   |             |             |             |
|---|-------------|-------------|-------------|
| C | 8.23349664  | 10.18010751 | 6.57246312  |
| C | 5.47617880  | 9.06570171  | 11.27646920 |
| C | 6.50247977  | 8.12281323  | 11.48252782 |
| H | 6.46693490  | 7.46802326  | 12.35515325 |
| C | 7.71759943  | 8.89978458  | 9.50696943  |
| C | 6.69072601  | 9.83103804  | 9.29787463  |
| H | 6.73979471  | 10.51997145 | 8.45600140  |
| C | 8.93209204  | 3.97368810  | 5.20215834  |
| C | 9.12445493  | 4.01636687  | 3.80817633  |
| C | 9.18622518  | 2.84658762  | 3.05355577  |
| C | 9.06773924  | 1.57896702  | 3.65760699  |
| C | 8.87442928  | 1.53871798  | 5.05260062  |
| C | 8.80435317  | 2.70784966  | 5.80579456  |
| H | 8.82112900  | 0.57402189  | 5.56009181  |
| H | 8.69363150  | 2.64098812  | 6.88963416  |
| H | 9.29591180  | 2.91721924  | 1.96994642  |
| H | 9.19118487  | 4.98265074  | 3.30468400  |
| C | 4.33516372  | 9.18059960  | 12.21349932 |
| C | 3.77805774  | 8.04774195  | 12.83759196 |
| C | 2.71472249  | 8.16542755  | 13.73037245 |
| C | 3.77517719  | 10.43573456 | 12.52067562 |
| C | 2.71212734  | 10.55331522 | 13.41211226 |
| H | 2.29101107  | 11.53995117 | 13.61328705 |
| H | 4.17623877  | 7.05752588  | 12.60893549 |
| H | 4.19388100  | 11.33599242 | 12.06753565 |
| H | 2.32117841  | 7.26881100  | 14.21281756 |
| C | 13.62216449 | 8.42893490  | 12.19451511 |
| C | 14.21476531 | 7.19075121  | 12.50823848 |
| C | 14.18004502 | 9.58489484  | 12.77396669 |
| C | 15.28323252 | 9.50636241  | 13.62081459 |
| C | 15.88078901 | 8.26851950  | 13.92915513 |
| C | 15.31762388 | 7.11224380  | 13.35486311 |
| H | 15.76579274 | 6.13818704  | 13.55877388 |
| H | 13.79411958 | 6.27353653  | 12.09217169 |
| H | 13.75336274 | 10.56220678 | 12.54126437 |
| H | 15.68034382 | 10.42040349 | 14.06621977 |
| C | 9.05038393  | 13.66420025 | 5.29253136  |
| C | 8.88840678  | 13.64677951 | 3.89421332  |
| C | 8.84756124  | 14.82991174 | 3.15933270  |
| C | 8.95686087  | 16.08655110 | 3.78790481  |
| C | 9.11497206  | 16.10134453 | 5.18792105  |
| C | 9.16521835  | 14.91885119 | 5.92157519  |
| H | 8.83125702  | 12.68970448 | 3.37228981  |
| H | 8.76414479  | 14.77799092 | 2.07237162  |
| H | 9.15838620  | 17.05639590 | 5.71422969  |
| H | 9.25125207  | 14.96603414 | 7.00871610  |

|   |             |             |             |
|---|-------------|-------------|-------------|
| C | 17.06210113 | 8.18332981  | 14.81603916 |
| C | 17.23211880 | 7.10363655  | 15.70803732 |
| C | 18.34707287 | 7.01394070  | 16.53306125 |
| C | 19.34682333 | 8.00651337  | 16.49606478 |
| C | 19.18994950 | 9.08887477  | 15.61561200 |
| C | 18.06395701 | 9.16948701  | 14.79473226 |
| H | 16.46112010 | 6.33417854  | 15.77535913 |
| H | 18.44627526 | 6.17305374  | 17.22252609 |
| H | 19.94727893 | 9.86943148  | 15.55239570 |
| H | 17.98117784 | 10.00519677 | 14.09750337 |
| C | 1.04024347  | 9.55286232  | 15.00221816 |
| C | 0.01737101  | 8.58443638  | 15.07707278 |
| C | -1.03267640 | 8.70768410  | 15.97984590 |
| C | -1.10037516 | 9.81152380  | 16.85326286 |
| C | -0.08887081 | 10.78348349 | 16.79069874 |
| C | 0.95880783  | 10.64987053 | 15.87844941 |
| C | 2.15863169  | 9.42156924  | 14.04219514 |
| H | 0.03055129  | 7.73299634  | 14.39438649 |
| H | -1.81672579 | 7.94826519  | 16.00788417 |
| H | -0.10171497 | 11.64433037 | 17.45836636 |
| H | 1.74799294  | 11.40383642 | 15.87047663 |
| C | 8.90247122  | 17.34528279 | 3.01177423  |
| C | 8.09893254  | 17.46230943 | 1.85796998  |
| C | 8.03573883  | 18.64767436 | 1.13487700  |
| C | 8.78132415  | 19.77381869 | 1.53731335  |
| C | 9.58932838  | 19.67191890 | 2.68092930  |
| C | 9.64313963  | 18.47643517 | 3.39921267  |
| H | 7.48498016  | 16.61790019 | 1.54028571  |
| H | 7.39057290  | 18.71295871 | 0.25641119  |
| H | 10.19151116 | 20.51644109 | 3.01445899  |
| H | 10.30134427 | 18.41713469 | 4.26773854  |
| C | 9.15321794  | 0.33357198  | 2.86313826  |
| C | 8.40205328  | -0.80510826 | 3.20494117  |
| C | 8.49347795  | -1.99119597 | 2.47529765  |
| C | 9.35145167  | -2.07607548 | 1.36711985  |
| C | 10.10446214 | -0.94059534 | 1.00769433  |
| C | 10.00319717 | 0.23562709  | 1.74159689  |
| H | 7.70781473  | -0.75965716 | 4.04595439  |
| H | 7.88277609  | -2.84320258 | 2.77239318  |
| H | 10.78547679 | -0.99165050 | 0.15573605  |
| H | 10.62431158 | 1.08770742  | 1.46001529  |
| S | 9.56733104  | -3.51618557 | 0.36495534  |
| C | 8.54697901  | -4.76701659 | 1.18785799  |
| H | 8.69263697  | -5.68527674 | 0.60566748  |
| H | 7.48284779  | -4.49967335 | 1.16695772  |
| H | 8.88072612  | -4.94154765 | 2.21864012  |

|   |             |             |             |
|---|-------------|-------------|-------------|
| S | 20.72545447 | 7.77776830  | 17.57880738 |
| C | 21.75288152 | 9.23963542  | 17.27778131 |
| H | 22.61858806 | 9.12278848  | 17.94124213 |
| H | 21.22465110 | 10.16491437 | 17.54111672 |
| H | 22.10471035 | 9.27948302  | 16.23886515 |
| S | 8.62349975  | 21.22255383 | 0.53648248  |
| C | 9.59413591  | 22.46679617 | 1.42624463  |
| H | 9.47645107  | 23.39115382 | 0.84745216  |
| H | 10.65943756 | 22.20499626 | 1.46234188  |
| H | 9.20361846  | 22.62890227 | 2.43913203  |
| S | -2.47917539 | 9.85864255  | 17.95892452 |
| C | -2.20453257 | 11.36916045 | 18.92105892 |
| H | -3.04553362 | 11.41950147 | 19.62350189 |
| H | -2.22038059 | 12.26250686 | 18.28362286 |
| H | -1.26755889 | 11.31920965 | 19.49027078 |
| H | 8.38805140  | 7.32877660  | 10.83919856 |
| H | 4.80968072  | 10.63963764 | 9.95055556  |
| H | 7.55163796  | 9.36657075  | 6.31834573  |
| H | 10.66893359 | 13.06434317 | 7.40546863  |
| H | 7.27880964  | 4.53874812  | 7.29981128  |
| H | 10.42451858 | 8.24589857  | 6.33323188  |
| H | 13.12916160 | 6.93751151  | 9.95975432  |
| H | 9.52783574  | 10.22018178 | 10.86038152 |

**42\_FHI-aims\_Junction\_Os1.xyz /// -40204528.015414119 eV**

159

# xyz file created automatically from geometry.in.

|    |            |             |             |
|----|------------|-------------|-------------|
| Au | 4.38560132 | 10.91066622 | 14.99358719 |
| Au | 3.61040906 | 11.23845871 | 17.64636229 |
| Au | 6.34770246 | 11.12055387 | 16.91641837 |
| Au | 4.64944026 | 13.42261796 | 16.06789118 |
| Au | 2.83942000 | 11.69465700 | 20.24769400 |
| Au | 5.63042300 | 11.51628000 | 19.54460300 |
| Au | 8.42142700 | 11.33790300 | 18.84151200 |
| Au | 4.08044300 | 13.80565100 | 18.72472900 |
| Au | 6.87144600 | 13.62727400 | 18.02163800 |
| Au | 5.32146500 | 15.91664600 | 17.20176400 |
| Au | 8.11246900 | 15.73826900 | 16.49867300 |
| Au | 2.069482   | 12.154876   | 22.988360   |
| Au | 4.860486   | 11.976499   | 22.285269   |
| Au | 7.651489   | 11.798122   | 21.582179   |
| Au | 10.442493  | 11.619745   | 20.879088   |
| Au | 3.310505   | 14.265871   | 21.465396   |
| Au | 6.101509   | 14.087494   | 20.762305   |
| Au | 8.892513   | 13.909116   | 20.059214   |

|    |             |             |             |
|----|-------------|-------------|-------------|
| Au | 4.551528    | 16.376865   | 19.942431   |
| Au | 7.342531    | 16.198488   | 19.239340   |
| Au | 5.792550    | 18.487859   | 18.419466   |
| Au | 1.760524    | 16.555242   | 20.645521   |
| Au | 1.299545    | 12.615096   | 25.729027   |
| Au | 4.090548    | 12.436719   | 25.025936   |
| Au | 6.881552    | 12.258341   | 24.322845   |
| Au | 9.672556    | 12.079964   | 23.619754   |
| Au | 12.463559   | 11.901587   | 22.916664   |
| Au | 2.540568    | 14.726090   | 24.206062   |
| Au | 5.331572    | 14.547713   | 23.502971   |
| Au | 8.122575    | 14.369336   | 22.799880   |
| Au | 10.913579   | 14.190959   | 22.096789   |
| Au | 3.781590    | 16.837084   | 22.683097   |
| Au | 6.572594    | 16.658707   | 21.980006   |
| Au | 9.363598    | 16.480330   | 21.276915   |
| Au | 5.022613    | 18.948079   | 21.160132   |
| Au | 7.813616    | 18.769701   | 20.457042   |
| Au | 6.263636    | 21.059073   | 19.637167   |
| S  | 3.62909054  | 9.43763515  | 13.20325897 |
| Os | 8.34680016  | 8.88032844  | 8.60980860  |
| C  | 6.63912776  | 7.84005761  | 10.89959773 |
| C  | 8.43414775  | 7.32658927  | 7.33759331  |
| C  | 7.32210891  | 6.45655934  | 7.24382618  |
| H  | 6.47204068  | 6.60633818  | 7.91463047  |
| C  | 7.23936424  | 5.39469573  | 6.33191938  |
| C  | 8.34397261  | 5.19547396  | 5.47609701  |
| C  | 9.44622840  | 6.06054371  | 5.52496111  |
| H  | 10.28365442 | 5.92084544  | 4.84046704  |
| C  | 10.71206219 | 8.04702899  | 6.35507345  |
| H  | 11.05930148 | 8.35652836  | 7.34937892  |
| H  | 10.45750910 | 8.96360659  | 5.80215204  |
| H  | 11.55094415 | 7.56287199  | 5.83702023  |
| C  | 9.51691658  | 7.12651229  | 6.42805697  |
| C  | 6.01862083  | 4.51406311  | 6.28015043  |
| H  | 5.29466173  | 4.80622908  | 7.05081553  |
| H  | 6.27713400  | 3.45528089  | 6.43650785  |
| H  | 5.51632471  | 4.58115744  | 5.30160720  |
| C  | 4.25669104  | 11.49863487 | 11.05930977 |
| H  | 4.50711645  | 12.15184745 | 10.21433715 |
| H  | 3.17537113  | 11.29445173 | 11.02541743 |
| H  | 4.44878696  | 12.06149604 | 11.98780310 |
| H  | 13.70363041 | 6.63484985  | 10.65866528 |
| H  | 12.61689384 | 5.91750875  | 11.85403489 |
| C  | 10.14807034 | 9.97706226  | 10.78371554 |
| C  | 9.90198432  | 8.91207662  | 9.87037915  |

|   |             |             |             |
|---|-------------|-------------|-------------|
| C | 10.73831694 | 7.77152928  | 9.93304471  |
| H | 10.55770609 | 6.93993871  | 9.24725027  |
| C | 11.79542905 | 7.64383968  | 10.83931674 |
| C | 12.04115592 | 8.72216480  | 11.72442835 |
| C | 11.21944285 | 9.86012000  | 11.67563742 |
| H | 11.40056456 | 10.69115828 | 12.35844672 |
| C | 9.27016650  | 11.20326260 | 10.87778610 |
| H | 8.91243632  | 11.54081613 | 9.89611968  |
| C | 12.64670473 | 6.40188209  | 10.86493587 |
| H | 8.38181676  | 10.99390067 | 11.49307276 |
| H | 9.80972367  | 12.03751381 | 11.34637089 |
| C | 5.06288137  | 10.22775803 | 11.01019110 |
| C | 8.33337859  | 10.40616176 | 7.31800267  |
| C | 9.46469067  | 11.25461033 | 7.26387607  |
| H | 10.27142995 | 11.11694541 | 7.98770452  |
| C | 9.61811560  | 12.26097152 | 6.30630483  |
| C | 8.58440988  | 12.42897214 | 5.35151642  |
| C | 7.44553311  | 11.60762099 | 5.40794928  |
| H | 6.64385797  | 11.73917028 | 4.68011166  |
| C | 6.07266663  | 9.71384950  | 6.30482424  |
| H | 5.72202060  | 9.42292245  | 7.30524858  |
| H | 6.28946491  | 8.78661901  | 5.75303232  |
| H | 5.24434105  | 10.22109765 | 5.79141557  |
| C | 7.29663797  | 10.59783130 | 6.36313085  |
| C | 10.84846884 | 13.12916248 | 6.28993343  |
| H | 11.54051841 | 12.84375238 | 7.09223475  |
| H | 10.59164228 | 14.19234878 | 6.42081309  |
| H | 11.38151995 | 13.04744910 | 5.32924665  |
| C | 4.89684842  | 9.19763386  | 11.96049715 |
| C | 5.67170310  | 8.03126074  | 11.89220471 |
| H | 5.54112215  | 7.24017165  | 12.63141723 |
| C | 7.47733946  | 6.58445694  | 10.93667599 |
| H | 7.69084243  | 6.20250054  | 9.92934146  |
| H | 8.44735920  | 6.78153454  | 11.41761313 |
| H | 6.97466173  | 5.78924607  | 11.50397221 |
| H | 12.30442777 | 5.67554368  | 10.11689595 |
| C | 6.83473005  | 8.86637656  | 9.93022842  |
| C | 6.02879437  | 10.02695641 | 10.01498481 |
| H | 6.16556782  | 10.82503066 | 9.28108962  |
| S | 13.39568148 | 8.54500296  | 12.84579565 |
| S | 8.81833957  | 13.68608967 | 4.13288318  |
| C | 3.50828788  | 7.82077429  | 14.02386073 |
| H | 2.70815128  | 7.93739672  | 14.76389715 |
| H | 3.22397235  | 7.06145239  | 13.28520748 |
| H | 4.43825217  | 7.55321906  | 14.53583081 |
| C | 7.38073723  | 13.50382386 | 3.04449369  |

|    |             |             |             |
|----|-------------|-------------|-------------|
| H  | 7.52808839  | 14.24989175 | 2.25401045  |
| H  | 7.34533229  | 12.50593094 | 2.58980319  |
| H  | 6.44299909  | 13.72481117 | 3.56935843  |
| C  | 10.03052447 | 3.56872275  | 3.87571920  |
| H  | 10.04770530 | 2.64083802  | 3.29220768  |
| H  | 10.36873694 | 4.39646795  | 3.24430223  |
| H  | 10.65891933 | 3.46206063  | 4.76806578  |
| C  | 13.35746838 | 10.07408741 | 13.81765595 |
| H  | 14.18254655 | 9.97502213  | 14.53369280 |
| H  | 13.53493676 | 10.95701945 | 13.19110705 |
| H  | 12.41614600 | 10.17613792 | 14.37183651 |
| S  | 8.29748728  | 3.77075300  | 4.38989975  |
| Au | 7.14973068  | 4.17684832  | 2.28714270  |
| Au | 6.18653790  | 3.02969077  | -0.03498745 |
| Au | 4.79777102  | 5.14555489  | 1.23653592  |
| Au | 7.57004065  | 5.54866222  | -0.06106827 |
| Au | 5.26452400  | 1.98748800  | -2.43106400 |
| Au | 3.82913000  | 4.11982000  | -1.12390600 |
| Au | 2.39373500  | 6.25215100  | 0.18325300  |
| Au | 6.39348000  | 4.63934500  | -2.33636500 |
| Au | 4.95808600  | 6.77167600  | -1.02920700 |
| Au | 7.52243600  | 7.29120200  | -2.24166600 |
| Au | 6.08704200  | 9.42353400  | -0.93450700 |
| Au | 4.299379    | 0.919676    | -4.929890   |
| Au | 2.863985    | 3.052007    | -3.622732   |
| Au | 1.428591    | 5.184339    | -2.315574   |
| Au | -0.006803   | 7.316670    | -1.008415   |
| Au | 5.428336    | 3.571533    | -4.835191   |
| Au | 3.992941    | 5.703864    | -3.528033   |
| Au | 2.557547    | 7.836196    | -2.220874   |
| Au | 6.557292    | 6.223390    | -4.740491   |
| Au | 5.121898    | 8.355721    | -3.433334   |
| Au | 7.686248    | 8.875247    | -4.645792   |
| Au | 3.686504    | 10.488053   | -2.126175   |
| Au | 3.334235    | -0.148136   | -7.428716   |
| Au | 1.898841    | 1.984195    | -6.121558   |
| Au | 0.463447    | 4.116526    | -4.814399   |
| Au | -0.971947   | 6.248858    | -3.507241   |
| Au | -2.407341   | 8.381189    | -2.200083   |
| Au | 4.463191    | 2.503720    | -7.334017   |
| Au | 3.027797    | 4.636052    | -6.026858   |
| Au | 1.592403    | 6.768383    | -4.719700   |
| Au | 0.157009    | 8.900715    | -3.412542   |
| Au | 5.592147    | 5.155577    | -7.239318   |
| Au | 4.156753    | 7.287909    | -5.932159   |
| Au | 2.721359    | 9.420241    | -4.625001   |

|    |          |           |           |
|----|----------|-----------|-----------|
| Au | 6.721103 | 7.807435  | -7.144618 |
| Au | 5.285710 | 9.939766  | -5.837460 |
| Au | 7.850060 | 10.459292 | -7.049919 |

**43\_FHI-aims\_Junction\_Os2.xyz ///** -40229669.999601454 eV

199

# xyz file created automatically from geometry.in.

|    |             |             |             |
|----|-------------|-------------|-------------|
| Au | 16.17283968 | 9.34945319  | 18.22301543 |
| Au | 14.19755985 | 9.22073787  | 20.08340923 |
| Au | 16.90145480 | 9.43783579  | 20.89737462 |
| Au | 15.49244891 | 11.72883558 | 19.44133993 |
| Au | 12.19519300 | 9.19779400  | 21.92583300 |
| Au | 14.93335000 | 9.36688400  | 22.81451900 |
| Au | 17.67150700 | 9.53597500  | 23.70320500 |
| Au | 13.71070900 | 11.60961400 | 21.47617400 |
| Au | 16.44886500 | 11.77870400 | 22.36485900 |
| Au | 15.22622300 | 14.02143400 | 21.02651400 |
| Au | 17.96438100 | 14.19052400 | 21.91520000 |
| Au | 10.051694   | 9.180363    | 23.854813   |
| Au | 12.789851   | 9.349454    | 24.743499   |
| Au | 15.528007   | 9.518545    | 25.632184   |
| Au | 18.266164   | 9.687635    | 26.520870   |
| Au | 11.567208   | 11.592184   | 23.405153   |
| Au | 14.305366   | 11.761274   | 24.293839   |
| Au | 17.043523   | 11.930365   | 25.182525   |
| Au | 13.082724   | 14.004004   | 22.955494   |
| Au | 15.820880   | 14.173094   | 23.844180   |
| Au | 14.598239   | 16.415824   | 22.505835   |
| Au | 10.344567   | 13.834913   | 22.066809   |
| Au | 7.908194    | 9.162933    | 25.783793   |
| Au | 10.646351   | 9.332024    | 26.672479   |
| Au | 13.384508   | 9.501115    | 27.561164   |
| Au | 16.122665   | 9.670205    | 28.449850   |
| Au | 18.860821   | 9.839296    | 29.338536   |
| Au | 9.423709    | 11.574754   | 25.334134   |
| Au | 12.161866   | 11.743844   | 26.222819   |
| Au | 14.900022   | 11.912935   | 27.111505   |
| Au | 17.638180   | 12.082025   | 28.000191   |
| Au | 10.939224   | 13.986574   | 24.884474   |
| Au | 13.677381   | 14.155664   | 25.773160   |
| Au | 16.415538   | 14.324755   | 26.661846   |
| Au | 12.454740   | 16.398394   | 24.434815   |
| Au | 15.192896   | 16.567484   | 25.323500   |
| Au | 13.970255   | 18.810214   | 23.985155   |
| Os | 8.84909803  | 8.88345587  | 8.86200499  |

|   |             |             |             |
|---|-------------|-------------|-------------|
| C | 6.83050242  | 8.06597411  | 10.97780697 |
| C | 8.90309190  | 7.26006103  | 7.69324173  |
| C | 7.81646479  | 6.35985942  | 7.71307285  |
| H | 6.97907128  | 6.55643790  | 8.38688508  |
| C | 7.73130691  | 5.23448105  | 6.87697227  |
| C | 8.79008674  | 4.99742458  | 5.96876877  |
| C | 9.86955533  | 5.90566396  | 5.94254376  |
| H | 10.68857948 | 5.70977103  | 5.24487981  |
| C | 11.12962154 | 7.97194741  | 6.59473285  |
| H | 11.53721169 | 8.31565082  | 7.55587294  |
| H | 10.82938358 | 8.87203457  | 6.03735325  |
| H | 11.94248262 | 7.48598224  | 6.03816248  |
| C | 9.95983380  | 7.03004607  | 6.76338649  |
| C | 6.49669046  | 4.36577147  | 6.95094316  |
| H | 5.64388151  | 4.94591809  | 7.32830270  |
| H | 6.63580909  | 3.51321367  | 7.63422051  |
| H | 6.22997191  | 3.95356160  | 5.96889910  |
| C | 4.21600438  | 11.44078742 | 10.02468992 |
| H | 4.36977369  | 11.69283509 | 8.96709571  |
| H | 3.15170794  | 11.21697918 | 10.17358969 |
| H | 4.44543609  | 12.34759485 | 10.60630117 |
| H | 14.20559468 | 6.60626851  | 11.23781834 |
| H | 12.83461918 | 5.55581609  | 11.63043668 |
| C | 10.51861999 | 9.85601908  | 11.20629980 |
| C | 10.33115804 | 8.85142142  | 10.21024898 |
| C | 11.21036343 | 7.74671106  | 10.20323321 |
| H | 11.07214584 | 6.96525221  | 9.45289572  |
| C | 12.27037527 | 7.59261155  | 11.11035637 |
| C | 12.47175882 | 8.60764647  | 12.07388336 |
| C | 11.59227756 | 9.71122778  | 12.08668881 |
| H | 11.73681492 | 10.47692768 | 12.85422250 |
| C | 9.57621973  | 11.02432008 | 11.37256977 |
| H | 9.36694187  | 11.53264515 | 10.42059518 |
| C | 13.16321833 | 6.37979459  | 10.97750135 |
| H | 8.60748521  | 10.68815051 | 11.77177987 |
| H | 9.99063439  | 11.76527104 | 12.06918384 |
| C | 5.09985306  | 10.27888593 | 10.41815890 |
| C | 8.98288313  | 10.43611923 | 7.60452654  |
| C | 10.03111620 | 11.36630386 | 7.76710763  |
| H | 10.75700030 | 11.21104951 | 8.56887478  |
| C | 10.21318219 | 12.47849683 | 6.92908865  |
| C | 9.30361342  | 12.66512587 | 5.86217731  |
| C | 8.27690337  | 11.71485890 | 5.68074491  |
| H | 7.57628180  | 11.86746596 | 4.85509969  |
| C | 6.99367623  | 9.61867949  | 6.17387239  |
| H | 6.42683545  | 9.30267686  | 7.06112413  |

|   |             |             |             |
|---|-------------|-------------|-------------|
| H | 7.41176749  | 8.70599040  | 5.72365515  |
| H | 6.28339775  | 10.05421451 | 5.45812485  |
| C | 8.08992693  | 10.60457881 | 6.50518532  |
| C | 11.39026989 | 13.39245499 | 7.17858950  |
| C | 4.77137232  | 9.35925088  | 11.44112649 |
| C | 5.64199728  | 8.27413895  | 11.67939119 |
| H | 5.39094508  | 7.57772846  | 12.48453470 |
| C | 7.72875727  | 6.91626393  | 11.36986640 |
| H | 8.09254509  | 6.35540238  | 10.49696206 |
| H | 8.61749591  | 7.27951457  | 11.90732401 |
| H | 7.19914124  | 6.21355243  | 12.02707813 |
| H | 13.13938232 | 6.00098557  | 9.94710085  |
| C | 7.16662207  | 8.99126503  | 9.94472070  |
| C | 6.28899158  | 10.07052926 | 9.70203923  |
| H | 6.53446822  | 10.78501664 | 8.91356399  |
| C | 8.81057293  | 3.86534462  | 5.00872872  |
| C | 9.12137700  | 4.09538674  | 3.65612719  |
| C | 9.18875975  | 3.05432711  | 2.72901932  |
| C | 8.95055412  | 1.73155928  | 3.13463692  |
| C | 8.64230308  | 1.48456932  | 4.48736741  |
| C | 8.57169468  | 2.53190882  | 5.40014175  |
| H | 8.46689689  | 0.46041206  | 4.82301116  |
| H | 8.35735216  | 2.30628665  | 6.44549182  |
| H | 9.42186001  | 3.28563944  | 1.69023202  |
| H | 9.29510480  | 5.11820061  | 3.31592307  |
| S | 9.00666827  | 0.32476159  | 2.06568521  |
| C | 9.45594891  | 1.03073903  | 0.45858168  |
| H | 9.50481155  | 0.17602404  | -0.22717304 |
| H | 10.43916544 | 1.51697297  | 0.49231796  |
| H | 8.69172095  | 1.73104759  | 0.09795804  |
| C | 3.55178509  | 9.48084005  | 12.27916215 |
| C | 2.72533316  | 8.36138024  | 12.51020689 |
| C | 1.60164938  | 8.44449718  | 13.32815905 |
| C | 1.26701205  | 9.66696072  | 13.93244428 |
| C | 3.19984048  | 10.69118489 | 12.90568901 |
| C | 2.06933660  | 10.79390992 | 13.71784402 |
| H | 1.83223079  | 11.75116745 | 14.18060239 |
| H | 2.96429686  | 7.41195517  | 12.02842479 |
| H | 3.83342759  | 11.56882531 | 12.77663170 |
| H | 0.98064677  | 7.56190535  | 13.49179678 |
| S | -0.19528471 | 9.65941706  | 14.96290184 |
| C | -0.08758584 | 11.21471747 | 15.89673030 |
| H | -0.94707247 | 11.20088612 | 16.57695793 |
| H | -0.15920946 | 12.08855928 | 15.24120221 |
| H | 0.84425616  | 11.22115582 | 16.47497295 |
| C | 13.57717418 | 8.57380408  | 13.06537306 |

|    |             |             |             |
|----|-------------|-------------|-------------|
| C  | 13.81254112 | 7.45017233  | 13.88099395 |
| C  | 14.41578424 | 9.69430430  | 13.23603232 |
| C  | 15.46120534 | 9.68460430  | 14.15711434 |
| C  | 15.68025727 | 8.54893287  | 14.95185407 |
| C  | 14.84250339 | 7.43372034  | 14.82192539 |
| H  | 14.97534670 | 6.55457977  | 15.45177801 |
| H  | 13.15804226 | 6.58172147  | 13.80162595 |
| H  | 14.26498796 | 10.57441420 | 12.60877072 |
| H  | 16.11704013 | 10.55160871 | 14.25156307 |
| S  | 17.05273892 | 8.63078657  | 16.09876382 |
| C  | 17.51596633 | 6.88406010  | 16.32484338 |
| H  | 18.41866256 | 6.90402515  | 16.94645647 |
| H  | 17.74249696 | 6.44688262  | 15.34517956 |
| H  | 16.73603311 | 6.31798708  | 16.84335616 |
| C  | 9.38593075  | 13.79384319 | 4.90095416  |
| C  | 9.31071577  | 13.55138681 | 3.51744463  |
| C  | 9.32996787  | 14.59078522 | 2.58585591  |
| C  | 9.41649466  | 15.92378698 | 3.01800298  |
| C  | 9.49403634  | 16.18234687 | 4.40117437  |
| C  | 9.48313728  | 15.13706953 | 5.31894868  |
| H  | 9.25329094  | 12.52143083 | 3.15955638  |
| H  | 9.28083260  | 14.35129547 | 1.52414859  |
| H  | 9.54744981  | 17.21386070 | 4.75534843  |
| H  | 9.51385261  | 15.37010195 | 6.38412553  |
| S  | 9.43784563  | 17.33096349 | 1.94779594  |
| C  | 9.17158974  | 16.61961920 | 0.30290768  |
| H  | 9.13221750  | 17.47873359 | -0.37801069 |
| H  | 8.21765031  | 16.07952350 | 0.25113688  |
| H  | 10.00116107 | 15.96721615 | 0.00216845  |
| H  | 11.78912806 | 13.80716113 | 6.24352801  |
| H  | 12.19554893 | 12.84738204 | 7.68945831  |
| H  | 11.11845735 | 14.24443463 | 7.82160945  |
| Au | -2.08674313 | 9.96152750  | 13.48071724 |
| Au | -3.54102932 | 9.08233615  | 11.34203977 |
| Au | -4.84185802 | 10.01364737 | 13.68810424 |
| Au | -3.23024520 | 11.90110474 | 11.89269631 |
| Au | -4.99551100 | 8.30861900  | 9.15674600  |
| Au | -6.34626600 | 9.20469000  | 11.54177800 |
| Au | -7.69702100 | 10.10076000 | 13.92680900 |
| Au | -4.89486900 | 11.08981600 | 9.91217600  |
| Au | -6.24562400 | 11.98588600 | 12.29720700 |
| Au | -4.79422700 | 13.87101200 | 10.66760600 |
| Au | -6.14498200 | 14.76708200 | 13.05263700 |
| Au | -6.526177   | 7.494952    | 6.852215    |
| Au | -7.876932   | 8.391023    | 9.237246    |
| Au | -9.227687   | 9.287093    | 11.622277   |

|    |            |           |           |
|----|------------|-----------|-----------|
| Au | -10.578442 | 10.183164 | 14.007309 |
| Au | -6.425535  | 10.276149 | 7.607644  |
| Au | -7.776290  | 11.172219 | 9.992676  |
| Au | -9.127045  | 12.068290 | 12.377707 |
| Au | -6.324893  | 13.057345 | 8.363074  |
| Au | -7.675648  | 13.953415 | 10.748105 |
| Au | -6.224251  | 15.838542 | 9.118504  |
| Au | -9.026403  | 14.849486 | 13.133137 |
| Au | -8.056843  | 6.681286  | 4.547683  |
| Au | -9.407598  | 7.577356  | 6.932714  |
| Au | -10.758353 | 8.473426  | 9.317746  |
| Au | -12.109108 | 9.369497  | 11.702778 |
| Au | -13.459863 | 10.265567 | 14.087808 |
| Au | -7.956201  | 9.462482  | 5.303113  |
| Au | -9.306956  | 10.358552 | 7.688144  |
| Au | -10.657711 | 11.254623 | 10.073175 |
| Au | -12.008466 | 12.150693 | 12.458207 |
| Au | -7.855558  | 12.243678 | 6.058542  |
| Au | -9.206314  | 13.139749 | 8.443574  |
| Au | -10.557069 | 14.035819 | 10.828605 |
| Au | -7.754917  | 15.024875 | 6.813972  |
| Au | -9.105671  | 15.920945 | 9.199003  |
| Au | -7.654274  | 17.806071 | 7.569402  |

#### 44\_FHI-aims\_Junction\_Os3.xyz /// -40254812.585844547 eV

239

# xyz file created automatically from geometry.in.

|    |             |            |             |
|----|-------------|------------|-------------|
| Au | 22.09809445 | 5.41298658 | 17.76313924 |
| Au | 21.79613786 | 2.72547222 | 17.39580583 |
| Au | 23.81199075 | 4.17788316 | 15.99625102 |
| Au | 23.92361569 | 3.75989318 | 19.03010816 |
| Au | 21.56112100 | 0.01743600 | 17.06450200 |
| Au | 23.58172300 | 1.47687000 | 15.61430400 |
| Au | 25.60232600 | 2.93630400 | 14.16410500 |
| Au | 23.83532900 | 1.10741500 | 18.46299500 |
| Au | 25.85593100 | 2.56684800 | 17.01279700 |
| Au | 26.10953700 | 2.19739200 | 19.86148800 |
| Au | 28.13013900 | 3.65682600 | 18.41129000 |
| Au | 21.313599   | -2.834509  | 16.716660   |
| Au | 23.334202   | -1.375075  | 15.266461   |
| Au | 25.354804   | 0.084358   | 13.816263   |
| Au | 27.375407   | 1.543792   | 12.366065   |
| Au | 23.587807   | -1.744532  | 18.115153   |
| Au | 25.608410   | -0.285098  | 16.664954   |
| Au | 27.629012   | 1.174336   | 15.214756   |

|    |             |             |             |
|----|-------------|-------------|-------------|
| Au | 25.862016   | -0.654554   | 19.513645   |
| Au | 27.882618   | 0.804880    | 18.063448   |
| Au | 28.136223   | 0.435424    | 20.912139   |
| Au | 23.841413   | -2.113988   | 20.963844   |
| Au | 21.066078   | -5.686455   | 16.368817   |
| Au | 23.086680   | -4.227022   | 14.918619   |
| Au | 25.107283   | -2.767588   | 13.468420   |
| Au | 27.127886   | -1.308154   | 12.018222   |
| Au | 29.148488   | 0.151280    | 10.568024   |
| Au | 23.340286   | -4.596478   | 17.767310   |
| Au | 25.360889   | -3.137044   | 16.317112   |
| Au | 27.381491   | -1.677610   | 14.866914   |
| Au | 29.402093   | -0.218176   | 13.416715   |
| Au | 25.614494   | -3.506500   | 19.165803   |
| Au | 27.635096   | -2.047066   | 17.715605   |
| Au | 29.655699   | -0.587632   | 16.265406   |
| Au | 27.888702   | -2.416522   | 20.564296   |
| Au | 29.909304   | -0.957089   | 19.114098   |
| Au | 30.162910   | -1.326545   | 21.962789   |
| S  | 21.14692587 | 7.62927365  | 18.04159863 |
| Os | 9.20669812  | 8.98037214  | 8.62173788  |
| C  | 7.35835082  | 8.22171734  | 10.90572751 |
| C  | 9.11947511  | 7.34868648  | 7.46633671  |
| C  | 8.09786704  | 6.40307409  | 7.69256131  |
| H  | 7.32573264  | 6.62400736  | 8.43294548  |
| C  | 8.00826032  | 5.18621482  | 6.99668850  |
| C  | 8.98306345  | 4.90826971  | 6.01126968  |
| C  | 9.96578238  | 5.88443826  | 5.74008186  |
| H  | 10.70733293 | 5.66701251  | 4.96603063  |
| C  | 11.12402567 | 8.09646844  | 6.03086399  |
| H  | 11.71543706 | 8.44244017  | 6.89180084  |
| H  | 10.67377979 | 8.99218052  | 5.57752770  |
| H  | 11.81903638 | 7.65902315  | 5.30147075  |
| C  | 10.06110662 | 7.09695926  | 6.42456842  |
| C  | 6.85682914  | 4.25643433  | 7.30491303  |
| H  | 5.99642154  | 4.82740417  | 7.67922740  |
| H  | 7.12028978  | 3.52115805  | 8.08141803  |
| H  | 6.54119358  | 3.69171674  | 6.41802185  |
| C  | 4.67445288  | 11.57149418 | 10.06700926 |
| H  | 4.74895045  | 11.80511588 | 8.99643474  |
| H  | 3.62554139  | 11.34939452 | 10.30262543 |
| H  | 4.94423791  | 12.48707551 | 10.61637805 |
| H  | 14.77907730 | 6.57753443  | 10.28224317 |
| H  | 13.45029814 | 5.47797659  | 10.67898721 |
| C  | 11.09902959 | 9.77530074  | 10.86649530 |
| C  | 10.82145055 | 8.86314592  | 9.80410553  |

|   |             |             |             |
|---|-------------|-------------|-------------|
| C | 11.69953384 | 7.77345417  | 9.61226878  |
| H | 11.49267415 | 7.05912618  | 8.81294015  |
| C | 12.83714483 | 7.54715459  | 10.40279963 |
| C | 13.11769090 | 8.46296713  | 11.44142960 |
| C | 12.24620031 | 9.55535215  | 11.63287555 |
| H | 12.45906517 | 10.24617449 | 12.45381166 |
| C | 10.17727393 | 10.91488193 | 11.23418367 |
| H | 9.84255445  | 11.48692953 | 10.35755013 |
| C | 13.72087181 | 6.36350526  | 10.08257156 |
| H | 9.26897807  | 10.53856868 | 11.72849510 |
| H | 10.67431956 | 11.60985145 | 11.92450492 |
| C | 5.58441621  | 10.41586370 | 10.41558974 |
| C | 9.22503206  | 10.60414962 | 7.44840058  |
| C | 10.20521397 | 11.59677569 | 7.65605119  |
| H | 11.00756974 | 11.40536014 | 8.37235632  |
| C | 10.21262700 | 12.82928018 | 6.98124681  |
| C | 9.20218033  | 13.07076017 | 6.02252301  |
| C | 8.26947918  | 12.04503371 | 5.75705410  |
| H | 7.49795727  | 12.23231148 | 5.00477989  |
| C | 7.21819635  | 9.78428420  | 6.04925700  |
| H | 6.66389592  | 9.40571508  | 6.92088761  |
| H | 7.69096099  | 8.91224483  | 5.57408298  |
| H | 6.48767942  | 10.20238047 | 5.34362410  |
| C | 8.24933526  | 10.82178792 | 6.42850187  |
| C | 11.31559483 | 13.81602720 | 7.28891945  |
| C | 5.33061009  | 9.52145070  | 11.47987744 |
| C | 6.22011255  | 8.44537980  | 11.68298574 |
| H | 6.02607424  | 7.76948182  | 12.52065501 |
| C | 8.28937831  | 7.08936653  | 11.27233196 |
| H | 8.60116976  | 6.50107191  | 10.39758142 |
| H | 9.20945183  | 7.47220244  | 11.73897176 |
| H | 7.80765666  | 6.40660529  | 11.98526384 |
| H | 13.61650159 | 6.08302606  | 9.02605685  |
| C | 7.61433618  | 9.12053755  | 9.82717430  |
| C | 6.72005698  | 10.19333048 | 9.62180212  |
| H | 6.90813193  | 10.89301306 | 8.80546719  |
| C | 9.01210463  | 3.64054137  | 5.23711508  |
| C | 9.11071130  | 3.65596104  | 3.83223156  |
| C | 9.17042138  | 2.47220167  | 3.09829537  |
| C | 9.14361384  | 1.21606269  | 3.73562196  |
| C | 9.05722027  | 1.20181516  | 5.14180768  |
| C | 8.98843542  | 2.38502058  | 5.87419171  |
| H | 9.08063401  | 0.24756698  | 5.67121326  |
| H | 8.95615135  | 2.33692409  | 6.96368131  |
| H | 9.20327838  | 2.52138311  | 2.00834198  |
| H | 9.10837022  | 4.61383393  | 3.30812079  |

|   |             |             |             |
|---|-------------|-------------|-------------|
| C | 4.17527065  | 9.66864823  | 12.40129021 |
| C | 3.33146730  | 8.57634678  | 12.68004670 |
| C | 2.26758491  | 8.69425910  | 13.57305127 |
| C | 3.90911733  | 10.88341322 | 13.06103144 |
| C | 2.84961568  | 11.00018124 | 13.95773495 |
| H | 2.66108801  | 11.96171281 | 14.43871592 |
| H | 3.51145245  | 7.62255540  | 12.17982036 |
| H | 4.55442236  | 11.74448425 | 12.88217372 |
| H | 1.64492993  | 7.82208317  | 13.78085904 |
| C | 14.28999315 | 8.32359577  | 12.34557884 |
| C | 14.52610672 | 7.14228275  | 13.07471292 |
| C | 15.18450223 | 9.39545593  | 12.53031303 |
| C | 16.27262667 | 9.28791789  | 13.39557854 |
| C | 16.50471252 | 8.10662759  | 14.12576148 |
| C | 15.60546523 | 7.03751429  | 13.95031540 |
| H | 15.76790872 | 6.10214512  | 14.48920535 |
| H | 13.84211936 | 6.29943372  | 12.96675119 |
| H | 15.02506578 | 10.32260050 | 11.97641811 |
| H | 16.93857144 | 10.14282538 | 13.52754736 |
| C | 9.07363081  | 14.34808647 | 5.27334877  |
| C | 8.91413724  | 14.34877000 | 3.87318500  |
| C | 8.74439456  | 15.53647223 | 3.16333462  |
| C | 8.72325821  | 16.78176710 | 3.82135201  |
| C | 8.87596694  | 16.78254708 | 5.22164886  |
| C | 9.04886398  | 15.59462306 | 5.92945287  |
| H | 8.95187386  | 13.40141976 | 3.33207139  |
| H | 8.66322601  | 15.49929066 | 2.07535089  |
| H | 8.81764477  | 17.72470695 | 5.76990137  |
| H | 9.12516164  | 15.62902378 | 7.01702711  |
| H | 11.57568526 | 14.42612855 | 6.41411056  |
| H | 12.21775215 | 13.28592907 | 7.62311313  |
| H | 11.03030631 | 14.50846215 | 8.09682209  |
| C | 17.65499664 | 7.99306379  | 15.05210393 |
| C | 17.52859444 | 7.33778534  | 16.29408778 |
| C | 18.60241396 | 7.24486682  | 17.17461243 |
| C | 19.84623005 | 7.79501961  | 16.82421115 |
| C | 20.00009515 | 8.43963408  | 15.59069822 |
| C | 18.90994343 | 8.53906155  | 14.72460657 |
| H | 16.56252824 | 6.92690921  | 16.59077787 |
| H | 18.47325731 | 6.75467983  | 18.14126568 |
| H | 20.95949860 | 8.85721094  | 15.28796333 |
| H | 19.04739109 | 9.02645330  | 13.75811331 |
| C | 0.88477602  | 10.03505415 | 15.19563168 |
| C | -0.34308326 | 9.37313370  | 14.98575855 |
| C | -1.39344320 | 9.49346389  | 15.88866741 |
| C | -1.25511965 | 10.28238713 | 17.04845171 |

|   |             |             |             |
|---|-------------|-------------|-------------|
| C | -0.03777454 | 10.94586103 | 17.27139676 |
| C | 1.00785708  | 10.82019113 | 16.35568802 |
| C | 2.00346437  | 9.90883268  | 14.23537799 |
| H | -0.48658670 | 8.77705536  | 14.08277358 |
| H | -2.33750652 | 8.98059149  | 15.69377107 |
| H | 0.10977371  | 11.55507298 | 18.16236691 |
| H | 1.95340084  | 11.32339934 | 16.56587467 |
| C | 8.55268994  | 18.04587263 | 3.06773669  |
| C | 7.71519177  | 18.11667277 | 1.93465761  |
| C | 7.56943467  | 19.29700076 | 1.21282152  |
| C | 8.25792037  | 20.45446671 | 1.61306959  |
| C | 9.08511122  | 20.41383384 | 2.74162838  |
| C | 9.22647981  | 19.21967891 | 3.45207597  |
| H | 7.14886281  | 17.23659564 | 1.62671594  |
| H | 6.90771579  | 19.32498165 | 0.34491848  |
| H | 9.63521168  | 21.29456243 | 3.07026466  |
| H | 9.90198808  | 19.19636453 | 4.30839227  |
| C | 9.20488920  | -0.04353352 | 2.96114971  |
| C | 8.49067886  | -1.18544073 | 3.36554979  |
| C | 8.54619804  | -2.37993619 | 2.64560764  |
| C | 9.33197227  | -2.47010675 | 1.48549143  |
| C | 10.05237341 | -1.33317230 | 1.06753596  |
| C | 9.98549874  | -0.14809715 | 1.79094361  |
| H | 7.85104963  | -1.13439871 | 4.24862626  |
| H | 7.96370959  | -3.23331591 | 2.99123518  |
| H | 10.67925974 | -1.38916271 | 0.17524995  |
| H | 10.57753606 | 0.70703706  | 1.46005259  |
| S | 9.49275572  | -3.91754477 | 0.48376762  |
| C | 8.51693473  | -5.16213569 | 1.36742943  |
| H | 8.62758058  | -6.08276665 | 0.78140113  |
| H | 7.45396451  | -4.89190359 | 1.40593351  |
| H | 8.90752187  | -5.33459194 | 2.37842868  |
| C | 22.44534674 | 8.75872852  | 17.45758590 |
| H | 23.23388272 | 8.70655555  | 18.21725363 |
| H | 22.04099301 | 9.77706108  | 17.41044690 |
| H | 22.85289992 | 8.44390673  | 16.49153917 |
| C | 9.09494988  | 23.16264751 | 1.35096123  |
| H | 8.95549607  | 24.06180983 | 0.73993240  |
| H | 10.14517609 | 22.84923488 | 1.31197867  |
| H | 8.77473569  | 23.36589318 | 2.37824942  |
| S | -2.65500993 | 10.35583468 | 18.12536643 |
| C | -2.10520821 | 11.44380635 | 19.46573883 |
| H | -2.95872667 | 11.50769314 | 20.15177182 |
| H | -1.86888643 | 12.45015359 | 19.09729441 |
| H | -1.24821890 | 11.01905903 | 20.00384011 |
| S | 8.05649853  | 21.89424552 | 0.56779085  |

|    |            |             |             |
|----|------------|-------------|-------------|
| Au | 5.79859800 | 22.73196019 | 0.81112978  |
| Au | 3.13395553 | 22.46630406 | 0.27523203  |
| Au | 4.03836587 | 23.39459586 | 2.80827205  |
| Au | 4.40019001 | 25.05605765 | 0.24478616  |
| Au | 0.45345500 | 22.28666600 | -0.27066300 |
| Au | 1.35766500 | 23.19853400 | 2.31134400  |
| Au | 2.26187500 | 24.11040100 | 4.89335100  |
| Au | 1.69526100 | 24.87619900 | -0.00971700 |
| Au | 2.59947100 | 25.78806700 | 2.57228900  |
| Au | 2.93706600 | 27.46573200 | 0.25122900  |
| Au | 3.84127600 | 28.37760000 | 2.83323600  |
| Au | -2.370083  | 22.090680   | -0.823002   |
| Au | -1.465873  | 23.002548   | 1.759005    |
| Au | -0.561663  | 23.914415   | 4.341011    |
| Au | 0.342547   | 24.826283   | 6.923018    |
| Au | -1.128278  | 24.680213   | -0.562056   |
| Au | -0.224068  | 25.592081   | 2.019951    |
| Au | 0.680143   | 26.503949   | 4.601957    |
| Au | 0.113528   | 27.269747   | -0.301110   |
| Au | 1.017738   | 28.181614   | 2.280896    |
| Au | 1.355334   | 29.859280   | -0.040165   |
| Au | 1.921948   | 29.093482   | 4.862903    |
| Au | -5.193621  | 21.894694   | -1.375341   |
| Au | -4.289412  | 22.806562   | 1.206665    |
| Au | -3.385201  | 23.718430   | 3.788672    |
| Au | -2.480991  | 24.630297   | 6.370679    |
| Au | -1.576782  | 25.542165   | 8.952685    |
| Au | -3.951816  | 24.484227   | -1.114395   |
| Au | -3.047606  | 25.396095   | 1.467612    |
| Au | -2.143396  | 26.307963   | 4.049618    |
| Au | -1.239186  | 27.219831   | 6.631624    |
| Au | -2.710010  | 27.073760   | -0.853450   |
| Au | -1.805800  | 27.985628   | 1.728557    |
| Au | -0.901590  | 28.897496   | 4.310564    |
| Au | -1.468205  | 29.663294   | -0.592504   |
| Au | -0.563995  | 30.575161   | 1.989502    |
| Au | -0.226399  | 32.252827   | -0.331558   |

**45\_FHI-aims\_Junction\_Si1.xyz ///** -39719139.529123940 eV

135

# xyz file created automatically from geometry.in.

|    |            |            |             |
|----|------------|------------|-------------|
| Au | 7.56038627 | 4.41691485 | 2.25686022  |
| Au | 6.44327098 | 3.34124035 | -0.04066251 |
| Au | 5.17959784 | 5.46272001 | 1.33748815  |
| Au | 7.82083338 | 5.89818379 | -0.02265301 |

|    |             |            |             |
|----|-------------|------------|-------------|
| Au | 5.44310200  | 2.37092900 | -2.40556300 |
| Au | 4.09360200  | 4.49358700 | -0.99523300 |
| Au | 2.74410200  | 6.61624600 | 0.41509600  |
| Au | 6.60662800  | 5.00787100 | -2.31283300 |
| Au | 5.25712900  | 7.13052900 | -0.90250400 |
| Au | 7.77015500  | 7.64481300 | -2.22010400 |
| Au | 6.42065500  | 9.76747200 | -0.80977500 |
| Au | 4.353563    | 1.361805   | -4.877491   |
| Au | 3.004064    | 3.484464   | -3.467162   |
| Au | 1.654565    | 5.607122   | -2.056833   |
| Au | 0.305065    | 7.729781   | -0.646504   |
| Au | 5.517090    | 3.998747   | -4.784762   |
| Au | 4.167591    | 6.121406   | -3.374433   |
| Au | 2.818091    | 8.244064   | -1.964104   |
| Au | 6.680616    | 6.635689   | -4.692033   |
| Au | 5.331117    | 8.758347   | -3.281704   |
| Au | 7.844143    | 9.272631   | -4.599304   |
| Au | 8.030116    | 4.513030   | -6.102362   |
| Au | 3.264025    | 0.352681   | -7.349420   |
| Au | 1.914526    | 2.475339   | -5.939092   |
| Au | 0.565026    | 4.597998   | -4.528762   |
| Au | -0.784473   | 6.720657   | -3.118433   |
| Au | -2.133972   | 8.843315   | -1.708104   |
| Au | 4.427552    | 2.989623   | -7.256691   |
| Au | 3.078052    | 5.112282   | -5.846362   |
| Au | 1.728553    | 7.234940   | -4.436033   |
| Au | 0.379054    | 9.357599   | -3.025704   |
| Au | 5.591079    | 5.626565   | -7.163962   |
| Au | 4.241579    | 7.749224   | -5.753633   |
| Au | 2.892079    | 9.871882   | -4.343304   |
| Au | 6.754605    | 8.263507   | -7.071233   |
| Au | 5.405106    | 10.386165  | -5.660904   |
| Au | 7.918132    | 10.900449  | -6.978503   |
| S  | 8.55958070  | 3.46645591 | 4.25635340  |
| Si | 9.13219097  | 8.35130246 | 8.52677023  |
| C  | 7.58448183  | 7.48167344 | 10.77960483 |
| C  | 9.01709882  | 6.84693656 | 7.36824965  |
| C  | 8.03457520  | 5.85778780 | 7.54720727  |
| H  | 7.36556914  | 5.90801601 | 8.40907456  |
| C  | 7.85751292  | 4.81703523 | 6.62866576  |
| C  | 8.68212538  | 4.74782581 | 5.50090167  |
| C  | 9.68767614  | 5.70943807 | 5.30433412  |
| H  | 10.33084701 | 5.65763800 | 4.42355177  |
| C  | 9.83983056  | 6.74456683 | 6.22525170  |
| C  | 10.67835251 | 9.09832465 | 10.80321533 |
| C  | 10.67014989 | 8.29724569 | 9.64471533  |

|   |             |             |             |
|---|-------------|-------------|-------------|
| C | 11.81207058 | 7.51074531  | 9.39559824  |
| H | 11.84891783 | 6.86147749  | 8.51775717  |
| C | 12.91244472 | 7.52582149  | 10.25470876 |
| C | 12.89039245 | 8.33788106  | 11.40043828 |
| C | 11.76802804 | 9.12702287  | 11.67711150 |
| H | 11.72235018 | 9.75593619  | 12.56536653 |
| C | 5.45314672  | 9.22365656  | 10.36180834 |
| C | 9.17165530  | 9.87465674  | 7.41710972  |
| C | 9.97730667  | 11.00266235 | 7.68069100  |
| H | 10.63947703 | 11.00907706 | 8.54991710  |
| C | 9.96509709  | 12.11793820 | 6.84738528  |
| C | 9.13707289  | 12.14903843 | 5.70628377  |
| C | 8.32804609  | 11.03501361 | 5.42648263  |
| H | 7.68221987  | 11.02023768 | 4.54916377  |
| C | 8.35389410  | 9.92350620  | 6.27076914  |
| C | 5.41057068  | 8.32625368  | 11.44837219 |
| C | 6.49219122  | 7.45149424  | 11.64938806 |
| H | 6.49508353  | 6.74996336  | 12.48311476 |
| C | 7.64219316  | 8.36675621  | 9.68467356  |
| C | 6.54792893  | 9.23814365  | 9.50094535  |
| H | 6.55535058  | 9.95187514  | 8.67362103  |
| S | 3.97594430  | 8.39640224  | 12.47540682 |
| S | 9.20660374  | 13.60707666 | 4.71507527  |
| C | 4.29273583  | 7.14188796  | 13.74353118 |
| H | 3.41554256  | 7.17252674  | 14.40132635 |
| H | 4.37505984  | 6.13816316  | 13.30795800 |
| H | 5.18673313  | 7.38133762  | 14.33306475 |
| C | 8.01641684  | 13.28245573 | 3.38814448  |
| H | 8.03780376  | 14.18132729 | 2.75980874  |
| H | 8.31174791  | 12.41841985 | 2.77983509  |
| H | 7.00133347  | 13.14898815 | 3.78227619  |
| C | 7.29190748  | 2.33903521  | 4.90740028  |
| H | 7.20022478  | 1.54945452  | 4.15275312  |
| H | 7.63920615  | 1.90714162  | 5.85374070  |
| H | 6.32686357  | 2.84258334  | 5.02493202  |
| C | 14.06358424 | 9.65068327  | 13.63121166 |
| H | 14.96315158 | 9.67020944  | 14.25734863 |
| H | 13.96024626 | 10.60548893 | 13.10143801 |
| H | 13.19148065 | 9.44181357  | 14.25944422 |
| H | 8.41654279  | 6.79943154  | 10.97567826 |
| H | 4.62338983  | 9.91528776  | 10.20058705 |
| H | 13.78371274 | 6.90412076  | 10.03976324 |
| H | 10.60012528 | 7.50445909  | 6.02841068  |
| H | 7.06896104  | 4.08513835  | 6.79886488  |
| H | 7.72293784  | 9.06895988  | 6.01260183  |
| H | 10.60457297 | 12.97421417 | 7.07257644  |

|    |             |            |             |
|----|-------------|------------|-------------|
| H  | 9.80437288  | 9.70644078 | 11.04949336 |
| S  | 14.35750587 | 8.31961760 | 12.42783814 |
| Au | 14.29738164 | 6.27883225 | 13.73523560 |
| Au | 12.98629307 | 3.91463776 | 14.12703764 |
| Au | 15.82068092 | 4.00819656 | 14.10690381 |
| Au | 14.23752329 | 5.32157912 | 16.32638232 |
| Au | 11.64941800 | 1.59007200 | 14.62444100 |
| Au | 14.53197400 | 1.63097400 | 14.55332800 |
| Au | 17.41453000 | 1.67187500 | 14.48221600 |
| Au | 13.12611800 | 2.86654000 | 16.74713800 |
| Au | 16.00867300 | 2.90744200 | 16.67602500 |
| Au | 14.60281800 | 4.14300800 | 18.86983500 |
| Au | 17.48537400 | 4.18391000 | 18.79872200 |
| Au | 10.254396   | -0.883872  | 15.123811   |
| Au | 13.136952   | -0.842971  | 15.052698   |
| Au | 16.019507   | -0.802069  | 14.981586   |
| Au | 18.902063   | -0.761167  | 14.910473   |
| Au | 11.731096   | 0.392596   | 17.246508   |
| Au | 14.613652   | 0.433497   | 17.175396   |
| Au | 17.496207   | 0.474399   | 17.104283   |
| Au | 13.207796   | 1.669064   | 19.369205   |
| Au | 16.090351   | 1.709966   | 19.298093   |
| Au | 14.684496   | 2.945532   | 21.491902   |
| Au | 18.972907   | 1.750867   | 19.226980   |
| Au | 8.859375    | -3.357817  | 15.623181   |
| Au | 11.741930   | -3.316915  | 15.552069   |
| Au | 14.624486   | -3.276013  | 15.480956   |
| Au | 17.507041   | -3.235112  | 15.409843   |
| Au | 20.389596   | -3.194210  | 15.338731   |
| Au | 10.336074   | -2.081349  | 17.745878   |
| Au | 13.218630   | -2.040447  | 17.674766   |
| Au | 16.101185   | -1.999545  | 17.603653   |
| Au | 18.983741   | -1.958644  | 17.532541   |
| Au | 11.812774   | -0.804881  | 19.868576   |
| Au | 14.695329   | -0.763979  | 19.797463   |
| Au | 17.577885   | -0.723077  | 19.726350   |
| Au | 13.289474   | 0.471588   | 21.991273   |
| Au | 16.172029   | 0.512489   | 21.920160   |
| Au | 14.766173   | 1.748056   | 24.113970   |

**46\_FHI-aims\_Junction\_Si2.xyz ///** -39744281.998911940 eV

175

# xyz file created automatically from geometry.in.

|    |            |             |            |
|----|------------|-------------|------------|
| Au | 6.56827730 | 18.74501675 | 2.50442517 |
| Au | 3.92298203 | 18.55915546 | 1.91861850 |

|    |             |             |             |
|----|-------------|-------------|-------------|
| Au | 4.78139831  | 19.65830219 | 4.40089417  |
| Au | 5.31291929  | 21.07416410 | 1.70633732  |
| Au | 1.25907900  | 18.46363900 | 1.29556700  |
| Au | 2.10462300  | 19.55080100 | 3.82914000  |
| Au | 2.95016700  | 20.63796200 | 6.36271300  |
| Au | 2.62336100  | 21.00239700 | 1.39200400  |
| Au | 3.46890400  | 22.08955800 | 3.92557600  |
| Au | 3.98764200  | 23.54115500 | 1.48843900  |
| Au | 4.83318600  | 24.62831700 | 4.02201300  |
| Au | -1.546183   | 18.358416   | 0.635802    |
| Au | -0.700639   | 19.445578   | 3.169375    |
| Au | 0.144904    | 20.532739   | 5.702948    |
| Au | 0.990448    | 21.619901   | 8.236521    |
| Au | -0.181901   | 20.897174   | 0.732238    |
| Au | 0.663642    | 21.984336   | 3.265811    |
| Au | 1.509186    | 23.071498   | 5.799384    |
| Au | 1.182380    | 23.435932   | 0.828675    |
| Au | 2.027924    | 24.523093   | 3.362247    |
| Au | 2.546662    | 25.974690   | 0.925111    |
| Au | 0.336837    | 22.348770   | -1.704898   |
| Au | -4.351445   | 18.253193   | -0.023962   |
| Au | -3.505902   | 19.340355   | 2.509610    |
| Au | -2.660358   | 20.427517   | 5.043183    |
| Au | -1.814814   | 21.514678   | 7.576756    |
| Au | -0.969271   | 22.601840   | 10.110329   |
| Au | -2.987164   | 20.791951   | 0.072473    |
| Au | -2.141620   | 21.879113   | 2.606047    |
| Au | -1.296077   | 22.966274   | 5.139619    |
| Au | -0.450533   | 24.053436   | 7.673192    |
| Au | -1.622882   | 23.330709   | 0.168909    |
| Au | -0.777339   | 24.417871   | 2.702483    |
| Au | 0.068205    | 25.505033   | 5.236056    |
| Au | -0.258600   | 25.869467   | 0.265346    |
| Au | 0.586943    | 26.956628   | 2.798918    |
| Au | 1.105681    | 28.408225   | 0.361782    |
| S  | 8.83976200  | 17.92705607 | 2.47522081  |
| Si | 9.11054337  | 9.15170047  | 8.82354382  |
| C  | 7.37063182  | 8.49485913  | 11.02224936 |
| C  | 9.09424726  | 7.63918328  | 7.68919080  |
| C  | 8.16447747  | 6.59064158  | 7.82024841  |
| H  | 7.39925063  | 6.63903452  | 8.59887766  |
| C  | 8.17828454  | 5.49603923  | 6.95281199  |
| C  | 9.12693186  | 5.40096464  | 5.91625415  |
| C  | 10.06454316 | 6.44497329  | 5.78641514  |
| H  | 10.83035048 | 6.38658194  | 5.01043102  |
| C  | 10.04288414 | 7.53871471  | 6.64976970  |

|   |             |             |             |
|---|-------------|-------------|-------------|
| C | 10.62620553 | 9.85736927  | 11.17426425 |
| C | 10.56530226 | 9.02617328  | 10.03641052 |
| C | 11.56792326 | 8.04763600  | 9.89739013  |
| H | 11.55800659 | 7.38009272  | 9.03287303  |
| C | 12.56878132 | 7.89001550  | 10.85728617 |
| C | 12.61086966 | 8.70909920  | 12.00063201 |
| C | 11.62876956 | 9.70935295  | 12.13305107 |
| H | 11.61762164 | 10.34053277 | 13.02391017 |
| C | 5.40365167  | 10.35943028 | 10.38412737 |
| C | 9.21653613  | 10.67471243 | 7.69736145  |
| C | 9.93252621  | 11.84226258 | 8.01964987  |
| H | 10.54141375 | 11.87436548 | 8.92638600  |
| C | 9.89660110  | 12.96818873 | 7.19388236  |
| C | 9.13917023  | 12.97162942 | 6.00723425  |
| C | 8.43014687  | 11.80247638 | 5.67361980  |
| H | 7.81371780  | 11.78267092 | 4.77279239  |
| C | 8.47223853  | 10.68089967 | 6.49993059  |
| C | 5.24814706  | 9.57942210  | 11.54630893 |
| C | 6.25022017  | 8.63312285  | 11.84112781 |
| H | 6.17179412  | 8.03265675  | 12.74954009 |
| C | 7.54067356  | 9.28906752  | 9.86886778  |
| C | 6.52550219  | 10.21760260 | 9.56698949  |
| H | 6.61499375  | 10.85171938 | 8.68201510  |
| C | 9.13955744  | 4.25321990  | 4.98193821  |
| C | 9.45530779  | 4.42849198  | 3.62296529  |
| C | 9.47831302  | 3.35538567  | 2.73169927  |
| C | 9.18727667  | 2.05693124  | 3.18071533  |
| C | 8.86694420  | 1.86704153  | 4.54023824  |
| C | 8.84138948  | 2.94533186  | 5.41730499  |
| H | 8.64828119  | 0.86275142  | 4.90862559  |
| H | 8.61635194  | 2.76655189  | 6.47023303  |
| H | 9.71480098  | 3.54252034  | 1.68489481  |
| H | 9.66028291  | 5.43118330  | 3.24340010  |
| S | 9.18779770  | 0.61522263  | 2.15903781  |
| C | 9.68397445  | 1.24604990  | 0.53515285  |
| H | 9.70585321  | 0.36658705  | -0.12011677 |
| H | 10.68560997 | 1.69325983  | 0.56517597  |
| H | 8.95282712  | 1.96311728  | 0.14027373  |
| C | 4.08857417  | 9.76925645  | 12.44563726 |
| C | 3.49360473  | 8.68316060  | 13.12059602 |
| C | 2.41687983  | 8.86786604  | 13.98004657 |
| C | 1.89255515  | 10.15693097 | 14.20498822 |
| C | 3.55127913  | 11.04837552 | 12.67386893 |
| C | 2.47421932  | 11.24731758 | 13.53825646 |
| H | 2.10293680  | 12.25918590 | 13.69620151 |
| H | 3.86569874  | 7.67171941  | 12.94792169 |

|    |             |             |             |
|----|-------------|-------------|-------------|
| H  | 4.00497058  | 11.91612264 | 12.19166599 |
| H  | 1.96851772  | 8.00731025  | 14.48062681 |
| S  | 0.53390343  | 10.27175438 | 15.32809497 |
| C  | 0.14622620  | 12.04108538 | 15.35257110 |
| H  | -0.69993913 | 12.13879150 | 16.04372131 |
| H  | -0.16049677 | 12.40033644 | 14.36213352 |
| H  | 0.98726133  | 12.63315876 | 15.73495515 |
| C  | 13.62898255 | 8.49606304  | 13.05607645 |
| C  | 14.01917451 | 7.19711110  | 13.42629236 |
| C  | 14.21649881 | 9.57835136  | 13.74221467 |
| C  | 15.15038535 | 9.37358984  | 14.75323954 |
| C  | 15.52024600 | 8.06632274  | 15.10927367 |
| C  | 14.95229488 | 6.97557849  | 14.44082637 |
| H  | 15.21276255 | 5.95208633  | 14.70610381 |
| H  | 13.56027869 | 6.33717680  | 12.93622917 |
| H  | 13.95055749 | 10.59973907 | 13.46643891 |
| H  | 15.58888852 | 10.22857639 | 15.27076350 |
| C  | 16.90826860 | 6.11386314  | 16.63545036 |
| H  | 17.61985040 | 5.99734582  | 17.46066680 |
| H  | 17.31524810 | 5.64724252  | 15.73014956 |
| H  | 15.94631920 | 5.67295302  | 16.91742116 |
| C  | 9.07761340  | 14.16341227 | 5.12940176  |
| C  | 9.03521816  | 14.02817573 | 3.72989779  |
| C  | 8.95084549  | 15.13954769 | 2.89042332  |
| C  | 8.91621930  | 16.42499439 | 3.44448106  |
| C  | 8.96504561  | 16.58580130 | 4.83911550  |
| C  | 9.04149805  | 15.46736318 | 5.66408217  |
| H  | 9.08982296  | 13.03428931 | 3.28338724  |
| H  | 8.92144948  | 14.98825660 | 1.81239973  |
| H  | 8.93047917  | 17.58449891 | 5.27784345  |
| H  | 9.04791144  | 15.60690962 | 6.74588566  |
| C  | 9.10249886  | 17.35171257 | 0.77083898  |
| H  | 9.10000509  | 18.26140015 | 0.15945658  |
| H  | 8.29699178  | 16.68917088 | 0.43767354  |
| H  | 10.08027274 | 16.85960088 | 0.70130148  |
| H  | 10.48564458 | 13.84814542 | 7.45986003  |
| H  | 7.90848503  | 9.79167672  | 6.20740249  |
| H  | 10.77930898 | 8.33430458  | 6.50571483  |
| H  | 7.41844814  | 4.71898488  | 7.05760344  |
| H  | 4.62861060  | 11.07829174 | 10.11149710 |
| H  | 8.14398078  | 7.77737669  | 11.30909280 |
| H  | 9.85026837  | 10.60874074 | 11.34219192 |
| H  | 13.33487066 | 7.12531981  | 10.71346835 |
| S  | 16.76455706 | 7.90907675  | 16.38682783 |
| Au | 15.80513679 | 8.74622654  | 18.43690952 |
| Au | 13.76456405 | 8.33270421  | 20.19909095 |

|    |             |             |             |
|----|-------------|-------------|-------------|
| Au | 16.43925904 | 8.50939294  | 21.13290154 |
| Au | 15.04680902 | 10.91058142 | 19.92905694 |
| Au | 11.68903200 | 8.04265000  | 21.93560900 |
| Au | 14.39182600 | 8.16719400  | 22.93323100 |
| Au | 17.09462100 | 8.29173700  | 23.93085300 |
| Au | 13.14828700 | 10.52805500 | 21.83970400 |
| Au | 15.85108100 | 10.65259800 | 22.83732500 |
| Au | 14.60754200 | 13.01345900 | 21.74379800 |
| Au | 17.31033600 | 13.13800200 | 22.74142000 |
| Au | 9.487128    | 7.733372    | 23.771861   |
| Au | 12.189922   | 7.857915    | 24.769483   |
| Au | 14.892716   | 7.982458    | 25.767104   |
| Au | 17.595510   | 8.107002    | 26.764726   |
| Au | 10.946382   | 10.218776   | 23.675955   |
| Au | 13.649177   | 10.343319   | 24.673577   |
| Au | 16.351971   | 10.467862   | 25.671199   |
| Au | 12.405637   | 12.704180   | 23.580050   |
| Au | 15.108431   | 12.828723   | 24.577672   |
| Au | 13.864892   | 15.189584   | 23.484145   |
| Au | 17.811225   | 12.953267   | 25.575294   |
| Au | 7.285224    | 7.424093    | 25.608113   |
| Au | 9.988017    | 7.548636    | 26.605734   |
| Au | 12.690811   | 7.673180    | 27.603356   |
| Au | 15.393606   | 7.797723    | 28.600978   |
| Au | 18.096399   | 7.922266    | 29.598600   |
| Au | 8.744478    | 9.909497    | 25.512207   |
| Au | 11.447272   | 10.034041   | 26.509829   |
| Au | 14.150066   | 10.158584   | 27.507451   |
| Au | 16.852860   | 10.283127   | 28.505073   |
| Au | 10.203732   | 12.394901   | 25.416302   |
| Au | 12.906527   | 12.519445   | 26.413924   |
| Au | 15.609321   | 12.643988   | 27.411546   |
| Au | 11.662988   | 14.880306   | 25.320397   |
| Au | 14.365781   | 15.004849   | 26.318019   |
| Au | 13.122242   | 17.365710   | 25.224492   |

**47\_FHI-aims\_Junction\_Si3.xyz ///** -39769424.579884693 eV

215

# xyz file created automatically from geometry.in.

|    |            |             |             |
|----|------------|-------------|-------------|
| Au | 5.79484207 | 22.48517401 | 0.52781031  |
| Au | 3.17110188 | 22.16463610 | -0.16701899 |
| Au | 3.89986675 | 23.12615401 | 2.40833655  |
| Au | 4.39178718 | 24.77732302 | -0.13353820 |
| Au | 0.53446300 | 21.93539000 | -0.87993800 |
| Au | 1.25788400 | 22.87857100 | 1.74740500  |

|    |             |             |             |
|----|-------------|-------------|-------------|
| Au | 1.98130500  | 23.82175300 | 4.37474700  |
| Au | 1.71299300  | 24.54773700 | -0.55967500 |
| Au | 2.43641400  | 25.49091800 | 2.06766700  |
| Au | 2.89152200  | 27.16008400 | -0.23941300 |
| Au | 3.61494300  | 28.10326600 | 2.38793000  |
| Au | -2.244736   | 21.686809   | -1.608027   |
| Au | -1.521315   | 22.629990   | 1.019316    |
| Au | -0.797895   | 23.573171   | 3.646657    |
| Au | -0.074473   | 24.516353   | 6.274000    |
| Au | -1.066207   | 24.299156   | -1.287765   |
| Au | -0.342786   | 25.242337   | 1.339578    |
| Au | 0.380635    | 26.185519   | 3.966920    |
| Au | 0.112322    | 26.911503   | -0.967502   |
| Au | 0.835743    | 27.854684   | 1.659840    |
| Au | 1.290851    | 29.523850   | -0.647240   |
| Au | -0.611099   | 25.968322   | -3.594845   |
| Au | -5.023936   | 21.438228   | -2.336116   |
| Au | -4.300515   | 22.381409   | 0.291226    |
| Au | -3.577094   | 23.324590   | 2.918568    |
| Au | -2.853673   | 24.267772   | 5.545911    |
| Au | -2.130252   | 25.210952   | 8.173253    |
| Au | -3.845407   | 24.050575   | -2.015854   |
| Au | -3.121986   | 24.993756   | 0.611489    |
| Au | -2.398565   | 25.936937   | 3.238831    |
| Au | -1.675144   | 26.880118   | 5.866173    |
| Au | -2.666878   | 26.662922   | -1.695592   |
| Au | -1.943457   | 27.606103   | 0.931751    |
| Au | -1.220036   | 28.549284   | 3.559094    |
| Au | -1.488348   | 29.275269   | -1.375329   |
| Au | -0.764927   | 30.218450   | 1.252013    |
| Au | -0.309819   | 31.887616   | -1.055067   |
| S  | 8.07207698  | 21.66811580 | 0.42582503  |
| Si | 9.16173241  | 8.89991472  | 8.54194082  |
| C  | 7.51448005  | 8.23299359  | 10.82191676 |
| C  | 9.11983987  | 7.34926389  | 7.45780394  |
| C  | 8.33061739  | 6.23577747  | 7.80593327  |
| H  | 7.67498200  | 6.28761770  | 8.67838538  |
| C  | 8.34808293  | 5.06563815  | 7.04656980  |
| C  | 9.15636144  | 4.95631551  | 5.89878371  |
| C  | 9.93660540  | 6.07165169  | 5.53636951  |
| H  | 10.58714660 | 6.01099818  | 4.66146263  |
| C  | 9.91702215  | 7.24025401  | 6.29965276  |
| C  | 10.68853395 | 9.55191126  | 10.90471758 |
| C  | 10.67295260 | 8.83512601  | 9.69026045  |
| C  | 11.80259805 | 8.04806263  | 9.39371452  |
| H  | 11.83394715 | 7.47029805  | 8.46688947  |

|   |             |             |             |
|---|-------------|-------------|-------------|
| C | 12.88771420 | 7.97273908  | 10.26787988 |
| C | 12.89017955 | 8.67738005  | 11.48732478 |
| C | 11.76936542 | 9.47698593  | 11.78400443 |
| H | 11.72308134 | 10.01144842 | 12.73478445 |
| C | 5.44921833  | 9.98358543  | 10.17573734 |
| C | 9.19550702  | 10.44053019 | 7.43629216  |
| C | 9.85563281  | 11.62008620 | 7.83151218  |
| H | 10.46707007 | 11.62163784 | 8.73730911  |
| C | 9.75285714  | 12.79647147 | 7.08769139  |
| C | 8.98491308  | 12.84323146 | 5.90810854  |
| C | 8.34628318  | 11.65972772 | 5.49121875  |
| H | 7.73093815  | 11.66916819 | 4.58911177  |
| C | 8.44924855  | 10.48633434 | 6.24075803  |
| C | 5.35624816  | 9.23398805  | 11.36388662 |
| C | 6.40600693  | 8.34315852  | 11.66219086 |
| H | 6.37501303  | 7.76576813  | 12.58832920 |
| C | 7.62430896  | 9.00111087  | 9.64388693  |
| C | 6.55899924  | 9.87005495  | 9.33858196  |
| H | 6.59932135  | 10.48099889 | 8.43388726  |
| C | 9.18337622  | 3.70730711  | 5.10269025  |
| C | 9.27381830  | 3.73347652  | 3.69766806  |
| C | 9.29739672  | 2.55495729  | 2.95471520  |
| C | 9.23875503  | 1.29392573  | 3.58112923  |
| C | 9.15289237  | 1.26980085  | 4.98741336  |
| C | 9.12170974  | 2.44766297  | 5.72967825  |
| H | 9.14908064  | 0.31110915  | 5.50886958  |
| H | 9.09087473  | 2.39192142  | 6.81930172  |
| H | 9.32356362  | 2.61271207  | 1.86513846  |
| H | 9.28486388  | 4.69308773  | 3.17754375  |
| C | 4.21293613  | 9.40999424  | 12.28829628 |
| C | 3.67454395  | 8.33095248  | 13.01503575 |
| C | 2.61647690  | 8.51521946  | 13.90304641 |
| C | 3.63954450  | 10.68099447 | 12.48489806 |
| C | 2.58401466  | 10.86524764 | 13.37316751 |
| H | 2.15226900  | 11.86078728 | 13.48955314 |
| H | 4.08307315  | 7.32884723  | 12.87189401 |
| H | 4.04340762  | 11.54168750 | 11.94917084 |
| H | 2.23696986  | 7.66059693  | 14.46601793 |
| C | 14.02103877 | 8.56226564  | 12.43874758 |
| C | 14.72736926 | 7.35249946  | 12.58633860 |
| C | 14.42155755 | 9.65011957  | 13.23884277 |
| C | 15.47548380 | 9.53340708  | 14.14168834 |
| C | 16.18151914 | 8.32343015  | 14.28775720 |
| C | 15.78220803 | 7.23515745  | 13.48804830 |
| H | 16.31696641 | 6.28645207  | 13.55874223 |
| H | 14.43174979 | 6.48226894  | 11.99827842 |

|   |             |             |             |
|---|-------------|-------------|-------------|
| H | 13.90715809 | 10.60756284 | 13.14261812 |
| H | 15.74027916 | 10.39146089 | 14.76188847 |
| C | 8.84227440  | 14.10334179 | 5.13967469  |
| C | 8.83000462  | 14.10869115 | 3.73141684  |
| C | 8.69277993  | 15.29668094 | 3.01570494  |
| C | 8.55836797  | 16.53388043 | 3.67579930  |
| C | 8.56255809  | 16.52752709 | 5.08434938  |
| C | 8.70304219  | 15.34021103 | 5.79907228  |
| H | 8.96800743  | 13.17125073 | 3.18988636  |
| H | 8.73027540  | 15.26822296 | 1.92526303  |
| H | 8.41387013  | 17.46170712 | 5.62867369  |
| H | 8.66548938  | 15.36471301 | 6.88945279  |
| C | 17.30460283 | 8.19987563  | 15.24521803 |
| C | 17.55216754 | 6.99107612  | 15.92929410 |
| C | 18.61798341 | 6.86478369  | 16.81441219 |
| C | 19.46579400 | 7.95943650  | 17.05180257 |
| C | 19.23319847 | 9.17415540  | 16.39629000 |
| C | 18.16743854 | 9.28180105  | 15.50113905 |
| H | 16.88548682 | 6.14051958  | 15.78209710 |
| H | 18.78593436 | 5.91855479  | 17.33193311 |
| H | 19.87674399 | 10.03697452 | 16.56183131 |
| H | 18.02222629 | 10.22430590 | 14.97144886 |
| C | 0.94002303  | 9.99976444  | 15.06283360 |
| C | -0.07801588 | 9.03911185  | 15.23498381 |
| C | -1.12860308 | 9.24807705  | 16.12109395 |
| C | -1.20157028 | 10.43338396 | 16.88022252 |
| C | -0.18939398 | 11.39413233 | 16.72666585 |
| C | 0.85741101  | 11.17494392 | 15.83081590 |
| C | 2.05015677  | 9.78885800  | 14.10820378 |
| H | -0.06362342 | 8.12541196  | 14.63806154 |
| H | -1.91254684 | 8.49445314  | 16.21965059 |
| H | -0.20280961 | 12.31498732 | 17.30857680 |
| H | 1.64478976  | 11.92645695 | 15.74979059 |
| C | 8.42756670  | 17.80002858 | 2.91752515  |
| C | 7.71856140  | 17.85817149 | 1.69933793  |
| C | 7.61295953  | 19.04389852 | 0.97867911  |
| C | 8.21278514  | 20.21755546 | 1.46555977  |
| C | 8.91112799  | 20.18833066 | 2.67839759  |
| C | 9.01511921  | 18.98939662 | 3.38621438  |
| H | 7.22198544  | 16.96410136 | 1.31985425  |
| H | 7.05330438  | 19.06237461 | 0.04169908  |
| H | 9.38958336  | 21.08213633 | 3.07620020  |
| H | 9.59197578  | 18.97604106 | 4.31212517  |
| C | 9.26828553  | 0.04031446  | 2.79560613  |
| C | 8.53972206  | -1.09320798 | 3.19857204  |
| C | 8.56831490  | -2.28253094 | 2.46880115  |

|    |             |             |             |
|----|-------------|-------------|-------------|
| C  | 9.33980699  | -2.37605596 | 1.29929608  |
| C  | 10.07354011 | -1.24730427 | 0.88212409  |
| C  | 10.03386352 | -0.06738785 | 1.61561758  |
| H  | 7.91021524  | -1.03947894 | 4.08865850  |
| H  | 7.97589087  | -3.12918846 | 2.81404686  |
| H  | 10.68940294 | -1.30624110 | -0.01757907 |
| H  | 10.63645950 | 0.78031257  | 1.28482843  |
| S  | 9.46600305  | -3.81727344 | 0.28417479  |
| C  | 8.49215975  | -5.05793986 | 1.17550303  |
| H  | 8.58512184  | -5.97578998 | 0.58205127  |
| H  | 7.43251100  | -4.77841735 | 1.23248442  |
| H  | 8.89742051  | -5.24029437 | 2.17894791  |
| C  | 21.81601204 | 9.19280506  | 18.07442937 |
| H  | 22.66928236 | 9.02372836  | 18.74141119 |
| H  | 21.25044233 | 10.06352731 | 18.42205524 |
| H  | 22.17166803 | 9.32580373  | 17.04562244 |
| C  | 9.03860982  | 22.93449391 | 1.29923107  |
| H  | 8.95234862  | 23.83540687 | 0.68106972  |
| H  | 10.08806211 | 22.62055680 | 1.35085793  |
| H  | 8.63091290  | 23.13606394 | 2.29531601  |
| S  | -2.58402338 | 10.59275832 | 17.96961011 |
| C  | -2.37026755 | 12.23939665 | 18.69456210 |
| H  | -3.23082773 | 12.37261604 | 19.36153950 |
| H  | -2.38998518 | 13.02246296 | 17.92604019 |
| H  | -1.44910899 | 12.30384480 | 19.28759798 |
| H  | 8.32537260  | 7.55926423  | 11.11116337 |
| H  | 4.63571377  | 10.65726497 | 9.90002686  |
| H  | 7.92609338  | 9.59207822  | 5.89238945  |
| H  | 10.29237062 | 13.68832288 | 7.41285399  |
| H  | 7.70197290  | 4.23204720  | 7.32873628  |
| H  | 10.53834831 | 8.08305719  | 5.98451335  |
| H  | 13.75339608 | 7.36655047  | 9.99408248  |
| H  | 9.82321316  | 10.15529689 | 11.19024314 |
| S  | 20.82821268 | 7.67129745  | 18.17521441 |
| Au | 19.89336649 | 7.70290830  | 20.41360625 |
| Au | 17.95126896 | 7.01190459  | 22.19345131 |
| Au | 20.65671466 | 7.12200251  | 23.00731782 |
| Au | 19.10872459 | 9.67261391  | 22.18051224 |
| Au | 15.97455600 | 6.45048100  | 23.99670800 |
| Au | 18.72734200 | 6.49919200  | 24.85441300 |
| Au | 21.48012700 | 6.54790200  | 25.71211800 |
| Au | 17.39313400 | 8.95652000  | 24.14923100 |
| Au | 20.14591800 | 9.00523100  | 25.00693600 |
| Au | 18.81171100 | 11.46255900 | 24.30175400 |
| Au | 21.56449600 | 11.51127000 | 25.15945900 |
| Au | 13.883789   | 5.859424    | 25.892810   |

|    |           |           |           |
|----|-----------|-----------|-----------|
| Au | 16.636574 | 5.908135  | 26.750515 |
| Au | 19.389359 | 5.956845  | 27.608220 |
| Au | 22.142144 | 6.005556  | 28.465925 |
| Au | 15.302366 | 8.365463  | 26.045332 |
| Au | 18.055151 | 8.414174  | 26.903038 |
| Au | 20.807937 | 8.462884  | 27.760743 |
| Au | 16.720944 | 10.871502 | 26.197855 |
| Au | 19.473728 | 10.920213 | 27.055560 |
| Au | 18.139521 | 13.377541 | 26.350378 |
| Au | 22.226514 | 10.968923 | 27.913265 |
| Au | 11.793022 | 5.268367  | 27.788911 |
| Au | 14.545806 | 5.317078  | 28.646616 |
| Au | 17.298592 | 5.365788  | 29.504321 |
| Au | 20.051377 | 5.414499  | 30.362027 |
| Au | 22.804162 | 5.463210  | 31.219731 |
| Au | 13.211599 | 7.774406  | 27.941434 |
| Au | 15.964384 | 7.823117  | 28.799139 |
| Au | 18.717169 | 7.871827  | 29.656844 |
| Au | 21.469954 | 7.920538  | 30.514549 |
| Au | 14.630176 | 10.280445 | 28.093957 |
| Au | 17.382961 | 10.329156 | 28.951662 |
| Au | 20.135747 | 10.377866 | 29.809367 |
| Au | 16.048753 | 12.786484 | 28.246480 |
| Au | 18.801538 | 12.835195 | 29.104184 |
| Au | 17.467330 | 15.292523 | 28.399002 |

**48\_FHI-aims\_Junction\_C1.xyz ///** -39712274.560149595 eV

135

# xyz file created automatically from geometry.in.

|    |            |             |             |
|----|------------|-------------|-------------|
| Au | 4.65114188 | 11.18745011 | 14.20952193 |
| Au | 3.69222859 | 12.21494298 | 16.60050075 |
| Au | 6.47454060 | 12.04448548 | 16.08644834 |
| Au | 4.69293788 | 13.91029999 | 14.49512264 |
| Au | 2.74466900 | 13.36028900 | 18.92048600 |
| Au | 5.57926100 | 13.15388300 | 18.43228100 |
| Au | 8.41385300 | 12.94747700 | 17.94407500 |
| Au | 3.98321300 | 15.00350200 | 16.90015900 |
| Au | 6.81780400 | 14.79709600 | 16.41195400 |
| Au | 5.22175600 | 16.64671500 | 14.87983300 |
| Au | 8.05634700 | 16.44030900 | 14.39162800 |
| Au | 1.785576   | 14.555993   | 21.363084   |
| Au | 4.620168   | 14.349587   | 20.874879   |
| Au | 7.454758   | 14.143182   | 20.386674   |
| Au | 10.289350  | 13.936776   | 19.898469   |
| Au | 3.024118   | 16.199206   | 19.342758   |

|    |             |             |             |
|----|-------------|-------------|-------------|
| Au | 5.858710    | 15.992800   | 18.854553   |
| Au | 8.693302    | 15.786394   | 18.366348   |
| Au | 4.262662    | 17.842419   | 17.322432   |
| Au | 7.097253    | 17.636013   | 16.834227   |
| Au | 5.501205    | 19.485632   | 15.302106   |
| Au | 1.428070    | 18.048825   | 17.810637   |
| Au | 0.826482    | 15.751697   | 23.805683   |
| Au | 3.661073    | 15.545292   | 23.317478   |
| Au | 6.495665    | 15.338886   | 22.829273   |
| Au | 9.330257    | 15.132480   | 22.341068   |
| Au | 12.164848   | 14.926074   | 21.852863   |
| Au | 2.065025    | 17.394911   | 21.785357   |
| Au | 4.899617    | 17.188505   | 21.297152   |
| Au | 7.734208    | 16.982099   | 20.808947   |
| Au | 10.568800   | 16.775693   | 20.320742   |
| Au | 3.303568    | 19.038124   | 19.765031   |
| Au | 6.138160    | 18.831718   | 19.276826   |
| Au | 8.972751    | 18.625312   | 18.788620   |
| Au | 4.542112    | 20.681337   | 17.744704   |
| Au | 7.376702    | 20.474931   | 17.256499   |
| Au | 5.780654    | 22.324550   | 15.724378   |
| S  | 4.30396440  | 9.23840227  | 12.79755369 |
| C  | 9.02528978  | 8.78470436  | 8.84522812  |
| C  | 7.69427120  | 7.96461770  | 10.86859606 |
| C  | 9.05013626  | 7.47080806  | 8.01578603  |
| C  | 8.10592366  | 6.44460808  | 8.12990605  |
| H  | 7.30884170  | 6.51296050  | 8.86984558  |
| C  | 8.13498339  | 5.32100098  | 7.28951072  |
| C  | 9.11882855  | 5.21295982  | 6.30432327  |
| C  | 10.08657632 | 6.22555138  | 6.18031047  |
| H  | 10.85714510 | 6.15947702  | 5.41007177  |
| C  | 10.04313599 | 7.33036472  | 7.02173234  |
| C  | 10.34848302 | 9.96983752  | 10.67529143 |
| C  | 10.26119536 | 8.88752881  | 9.78001916  |
| C  | 11.27586416 | 7.91856163  | 9.84258534  |
| H  | 11.24619942 | 7.04410980  | 9.19287975  |
| C  | 12.33667632 | 8.03277157  | 10.74153161 |
| C  | 12.42038815 | 9.12703521  | 11.62087652 |
| C  | 11.40632221 | 10.09997186 | 11.57467933 |
| H  | 11.42479715 | 10.95892968 | 12.24482718 |
| C  | 5.78604831  | 9.97321725  | 10.63701980 |
| C  | 8.99247013  | 9.92000725  | 7.78498052  |
| C  | 9.94866718  | 10.94461873 | 7.70583121  |
| H  | 10.76494015 | 10.98792559 | 8.42651462  |
| C  | 9.88873266  | 11.91661948 | 6.70582579  |
| C  | 8.86353511  | 11.89846693 | 5.74311521  |

|    |             |             |             |
|----|-------------|-------------|-------------|
| C  | 7.90784135  | 10.86902770 | 5.80350602  |
| H  | 7.10474044  | 10.80877678 | 5.06961498  |
| C  | 7.98485110  | 9.90003396  | 6.80336143  |
| C  | 5.69626235  | 9.05160178  | 11.68779307 |
| C  | 6.65954695  | 8.03969368  | 11.80213073 |
| H  | 6.63017749  | 7.31831196  | 12.61747711 |
| C  | 7.79652951  | 8.86814439  | 9.79447998  |
| C  | 6.82471144  | 9.87800818  | 9.70791850  |
| H  | 6.88082108  | 10.62226375 | 8.91479446  |
| S  | 13.80443233 | 9.16165716  | 12.71783956 |
| S  | 8.88546369  | 13.18153297 | 4.52797059  |
| C  | 4.45225381  | 7.82176815  | 13.92643773 |
| H  | 3.61312372  | 7.92442006  | 14.62408909 |
| H  | 4.34703570  | 6.88976376  | 13.35754879 |
| H  | 5.39406619  | 7.84836150  | 14.48465535 |
| C  | 7.42936057  | 12.82982458 | 3.50771380  |
| H  | 7.41265396  | 13.62303672 | 2.75021315  |
| H  | 7.51273386  | 11.85902006 | 3.00265433  |
| H  | 6.50418078  | 12.88144188 | 4.09573194  |
| C  | 7.64889205  | 2.97993814  | 5.34962371  |
| H  | 7.64012958  | 2.20606680  | 4.57343341  |
| H  | 7.62687036  | 2.50579462  | 6.33632559  |
| H  | 6.79512448  | 3.65417352  | 5.21010746  |
| C  | 13.51859255 | 10.64095826 | 13.72522839 |
| H  | 14.35945318 | 10.67338834 | 14.42900985 |
| H  | 13.53111204 | 11.55423400 | 13.11682913 |
| H  | 12.58256805 | 10.56824977 | 14.29314758 |
| H  | 8.46088681  | 7.19924922  | 11.00234070 |
| H  | 5.05499296  | 10.77908737 | 10.54737908 |
| H  | 13.10451977 | 7.25671951  | 10.76524848 |
| H  | 10.77994280 | 8.12309455  | 6.88403457  |
| H  | 7.37220651  | 4.55304249  | 7.41317645  |
| H  | 7.24173648  | 9.09957572  | 6.81016190  |
| H  | 10.65059503 | 12.69805638 | 6.67014980  |
| H  | 9.56425332  | 10.72934561 | 10.68469281 |
| S  | 9.18898513  | 3.90578865  | 5.08143316  |
| Au | 10.91411746 | 2.26412290  | 5.57241082  |
| Au | 11.36750753 | -0.31084732 | 6.39387727  |
| Au | 13.01711122 | 0.83826673  | 4.43795990  |
| Au | 13.02050795 | 1.91652793  | 7.29640249  |
| Au | 11.88064500 | -2.80906800 | 7.37111300  |
| Au | 13.57266600 | -1.72181500 | 5.30452000  |
| Au | 15.26468600 | -0.63456100 | 3.23792800  |
| Au | 13.66824500 | -0.62712600 | 7.97067400  |
| Au | 15.36026500 | 0.46012700  | 5.90408200  |
| Au | 15.45584400 | 1.55481500  | 8.57023600  |

|    |             |            |            |
|----|-------------|------------|------------|
| Au | 17.14786400 | 2.64206900 | 6.50364400 |
| Au | 12.408138   | -5.438274  | 8.431720   |
| Au | 14.100158   | -4.351020  | 6.365127   |
| Au | 15.792178   | -3.263767  | 4.298535   |
| Au | 17.484198   | -2.176513  | 2.231943   |
| Au | 14.195737   | -3.256332  | 9.031282   |
| Au | 15.887757   | -2.169078  | 6.964689   |
| Au | 17.579778   | -1.081825  | 4.898097   |
| Au | 15.983337   | -1.074390  | 9.630843   |
| Au | 17.675357   | 0.012863   | 7.564252   |
| Au | 17.770936   | 1.107551   | 10.230406  |
| Au | 19.367377   | 1.100117   | 5.497659   |
| Au | 12.935631   | -8.067479  | 9.492327   |
| Au | 14.627650   | -6.980226  | 7.425735   |
| Au | 16.319671   | -5.892972  | 5.359142   |
| Au | 18.011691   | -4.805718  | 3.292550   |
| Au | 19.703711   | -3.718465  | 1.225958   |
| Au | 14.723230   | -5.885538  | 10.091889  |
| Au | 16.415250   | -4.798284  | 8.025297   |
| Au | 18.107270   | -3.711030  | 5.958705   |
| Au | 19.799290   | -2.623776  | 3.892112   |
| Au | 16.510829   | -3.703596  | 10.691451  |
| Au | 18.202849   | -2.616342  | 8.624859   |
| Au | 19.894870   | -1.529088  | 6.558266   |
| Au | 18.298429   | -1.521654  | 11.291013  |
| Au | 19.990449   | -0.434400  | 9.224421   |
| Au | 20.086028   | 0.660288   | 11.890575  |

**49\_FHI-aims\_Junction\_C2.xyz ///** -39737417.143819436 eV

175

# xyz file created automatically from geometry.in.

|    |             |             |             |
|----|-------------|-------------|-------------|
| Au | 14.99521874 | 8.89929927  | 18.41315919 |
| Au | 12.79737444 | 8.40848445  | 19.94225718 |
| Au | 15.35162948 | 8.60791017  | 21.15460993 |
| Au | 14.03360286 | 11.02224602 | 19.87030277 |
| Au | 10.56808900 | 8.02814800  | 21.45465700 |
| Au | 13.14641000 | 8.17110100  | 22.73827700 |
| Au | 15.72473100 | 8.31405500  | 24.02189700 |
| Au | 11.98105100 | 10.53905200 | 21.57612300 |
| Au | 14.55937100 | 10.68200600 | 22.85974300 |
| Au | 13.39401200 | 13.04995700 | 21.69759000 |
| Au | 15.97233400 | 13.19291000 | 22.98121000 |
| Au | 8.189589    | 7.634113    | 23.036850   |
| Au | 10.767911   | 7.777067    | 24.320470   |
| Au | 13.346231   | 7.920020    | 25.604090   |

|    |             |             |             |
|----|-------------|-------------|-------------|
| Au | 15.924553   | 8.062973    | 26.887711   |
| Au | 9.602551    | 10.145018   | 23.158316   |
| Au | 12.180872   | 10.287971   | 24.441937   |
| Au | 14.759194   | 10.430924   | 25.725557   |
| Au | 11.015513   | 12.655922   | 23.279783   |
| Au | 13.593834   | 12.798875   | 24.563403   |
| Au | 12.428475   | 15.166827   | 23.401250   |
| Au | 8.437192    | 12.512969   | 21.996163   |
| Au | 5.811090    | 7.240079    | 24.619043   |
| Au | 8.389411    | 7.383032    | 25.902663   |
| Au | 10.967732   | 7.525986    | 27.186284   |
| Au | 13.546054   | 7.668939    | 28.469904   |
| Au | 16.124374   | 7.811892    | 29.753524   |
| Au | 7.224052    | 9.750983    | 24.740510   |
| Au | 9.802373    | 9.893937    | 26.024130   |
| Au | 12.380694   | 10.036890   | 27.307750   |
| Au | 14.959015   | 10.179843   | 28.591371   |
| Au | 8.637013    | 12.261888   | 24.861976   |
| Au | 11.215335   | 12.404841   | 26.145597   |
| Au | 13.793656   | 12.547794   | 27.429217   |
| Au | 10.049976   | 14.772792   | 24.983443   |
| Au | 12.628296   | 14.915745   | 26.267063   |
| Au | 11.462937   | 17.283696   | 25.104909   |
| S  | 16.19413116 | 8.36703026  | 16.38620709 |
| C  | 8.96746730  | 8.67413902  | 8.78698733  |
| C  | 7.49379145  | 7.81314710  | 10.68365294 |
| C  | 8.89423447  | 7.42848385  | 7.86112686  |
| C  | 7.80183050  | 6.55009857  | 7.82856404  |
| H  | 6.97328717  | 6.68505830  | 8.52307892  |
| C  | 7.72589281  | 5.52082060  | 6.88424608  |
| C  | 8.73720461  | 5.33114882  | 5.92901240  |
| C  | 9.84402198  | 6.20308052  | 5.97115547  |
| H  | 10.66230932 | 6.07271349  | 5.26043426  |
| C  | 9.91547605  | 7.22725149  | 6.91088418  |
| C  | 10.29154929 | 9.63749553  | 10.73730853 |
| C  | 10.15819200 | 8.60965029  | 9.78195227  |
| C  | 11.05464086 | 7.53507991  | 9.86333787  |
| H  | 10.98491076 | 6.71181442  | 9.15253875  |
| C  | 12.03662144 | 7.48338492  | 10.85951616 |
| C  | 12.16425318 | 8.50599400  | 11.81406907 |
| C  | 11.27263429 | 9.59409774  | 11.72246965 |
| H  | 11.31266947 | 10.39027273 | 12.46787925 |
| C  | 5.76863550  | 9.98308002  | 10.56516199 |
| C  | 9.08307835  | 9.87488796  | 7.80887040  |
| C  | 10.14074596 | 10.79420902 | 7.81388548  |
| H  | 10.94075858 | 10.70398925 | 8.54849112  |

|   |             |             |             |
|---|-------------|-------------|-------------|
| C | 10.21055423 | 11.82373716 | 6.86842555  |
| C | 9.22604292  | 11.97692634 | 5.87790048  |
| C | 8.16761255  | 11.04567985 | 5.87034428  |
| H | 7.37074161  | 11.14258662 | 5.13088838  |
| C | 8.10479361  | 10.01789331 | 6.80506765  |
| C | 5.54327698  | 9.00119616  | 11.54413206 |
| C | 6.43171395  | 7.90701189  | 11.57778485 |
| H | 6.31421698  | 7.14212267  | 12.34754033 |
| C | 7.71471698  | 8.79528762  | 9.69801507  |
| C | 6.83204489  | 9.88308959  | 9.66254144  |
| H | 6.96929217  | 10.67475525 | 8.92664068  |
| C | 8.62943093  | 4.28055623  | 4.88900344  |
| C | 9.03941320  | 4.53358321  | 3.56644885  |
| C | 8.94505443  | 3.55844399  | 2.57310395  |
| C | 8.45008505  | 2.28791682  | 2.89319218  |
| C | 8.02623577  | 2.01429807  | 4.20403960  |
| C | 8.10916092  | 3.00329679  | 5.18127113  |
| H | 7.65039615  | 1.02262483  | 4.46177107  |
| H | 7.79998188  | 2.76848997  | 6.20090526  |
| H | 9.25333616  | 3.80312903  | 1.55748835  |
| H | 9.41159432  | 5.52380524  | 3.29941644  |
| C | 9.45460367  | 1.46850651  | 0.37109214  |
| H | 9.49241484  | 0.61666136  | -0.31785083 |
| H | 10.45511377 | 1.66881181  | 0.77248024  |
| H | 9.05136032  | 2.33985270  | -0.15466631 |
| C | 4.43693216  | 9.11865640  | 12.52003177 |
| C | 3.72224708  | 7.98443681  | 12.95802891 |
| C | 2.69431616  | 8.09176282  | 13.88755085 |
| C | 2.34043852  | 9.34650250  | 14.42347687 |
| C | 4.06972911  | 10.36454075 | 13.05796009 |
| C | 3.04195968  | 10.48493093 | 13.99460726 |
| H | 2.80225621  | 11.46996713 | 14.39355233 |
| H | 3.96167875  | 7.00327912  | 12.54403001 |
| H | 4.61959115  | 11.26030475 | 12.76319802 |
| H | 2.15255227  | 7.19779832  | 14.20296491 |
| S | 1.02419969  | 9.35536332  | 15.60262555 |
| C | 0.91487872  | 11.09040850 | 16.11188987 |
| H | 0.12197714  | 11.11683609 | 16.86937246 |
| H | 0.62928132  | 11.74173530 | 15.27619963 |
| H | 1.85246248  | 11.43451691 | 16.56657804 |
| C | 13.16382527 | 8.43800996  | 12.90659022 |
| C | 13.48148316 | 7.21624847  | 13.52917241 |
| C | 13.80766177 | 9.60006113  | 13.38045025 |
| C | 14.72245990 | 9.54699497  | 14.42802737 |
| C | 15.01239620 | 8.31797970  | 15.04234456 |
| C | 14.38829416 | 7.14936059  | 14.58818485 |

|    |             |             |             |
|----|-------------|-------------|-------------|
| H  | 14.58469916 | 6.18696412  | 15.05919932 |
| H  | 12.98112780 | 6.30180533  | 13.20706190 |
| H  | 13.60859983 | 10.55955967 | 12.90122225 |
| H  | 15.21784330 | 10.45826758 | 14.76732996 |
| C  | 16.70035031 | 6.63122045  | 16.58330342 |
| H  | 17.47316671 | 6.64686735  | 17.36037243 |
| H  | 17.12605682 | 6.27172950  | 15.63896254 |
| H  | 15.86991491 | 5.99993472  | 16.91439786 |
| C  | 9.28900565  | 13.06130809 | 4.87237876  |
| C  | 8.87074423  | 12.84613071 | 3.54710583  |
| C  | 8.90211626  | 13.86406589 | 2.59336190  |
| C  | 9.35390893  | 15.14667685 | 2.94338326  |
| C  | 9.78441480  | 15.37460739 | 4.26609443  |
| C  | 9.75362207  | 14.35037167 | 5.20622146  |
| H  | 8.53522323  | 11.85280480 | 3.24339052  |
| H  | 8.57846238  | 13.64613907 | 1.57626145  |
| H  | 10.12822988 | 16.36891343 | 4.55830509  |
| H  | 10.06280078 | 14.56303938 | 6.23124371  |
| S  | 9.42703238  | 16.52324245 | 1.83721800  |
| C  | 8.70037271  | 15.87989559 | 0.30682788  |
| H  | 8.70140349  | 16.72764717 | -0.38921029 |
| H  | 7.66604501  | 15.54849663 | 0.46312070  |
| H  | 9.30493890  | 15.07009237 | -0.12062895 |
| H  | 11.06782567 | 12.49954223 | 6.88495441  |
| H  | 7.27678392  | 9.30852753  | 6.75538379  |
| H  | 10.76999747 | 7.90613520  | 6.88963000  |
| H  | 6.83597809  | 4.88879945  | 6.86156905  |
| H  | 5.09111433  | 10.83572623 | 10.49140654 |
| H  | 8.18737429  | 6.97478428  | 10.77325543 |
| H  | 9.58412335  | 10.46825209 | 10.73303510 |
| H  | 12.72166189 | 6.63348228  | 10.88044979 |
| S  | 8.36771071  | 0.93321685  | 1.72806730  |
| Au | 6.19729295  | 0.77953423  | 0.64633176  |
| Au | 4.93579623  | -0.15985614 | -1.61931115 |
| Au | 3.67572064  | -0.30765264 | 0.91042894  |
| Au | 4.26512303  | 2.39272366  | -0.44378990 |
| Au | 3.61068900  | -0.96404000 | -3.89862800 |
| Au | 2.32250600  | -1.16949500 | -1.32681400 |
| Au | 1.03432300  | -1.37495000 | 1.24500100  |
| Au | 2.78866800  | 1.42184700  | -2.50303400 |
| Au | 1.50048600  | 1.21639200  | 0.06878000  |
| Au | 1.96664800  | 3.80773400  | -1.10744100 |
| Au | 0.67846500  | 3.60227900  | 1.46437400  |
| Au | 2.214212    | -1.794264   | -6.281156   |
| Au | 0.926030    | -1.999719   | -3.709341   |
| Au | -0.362153   | -2.205174   | -1.137527   |

|    |           |           |           |
|----|-----------|-----------|-----------|
| Au | -1.650336 | -2.410629 | 1.434288  |
| Au | 1.392192  | 0.591623  | -4.885563 |
| Au | 0.104009  | 0.386168  | -2.313748 |
| Au | -1.184174 | 0.180713  | 0.258067  |
| Au | 0.570171  | 2.977510  | -3.489968 |
| Au | -0.718012 | 2.772055  | -0.918154 |
| Au | -0.251850 | 5.363397  | -2.094375 |
| Au | -2.006195 | 2.566600  | 1.653660  |
| Au | 0.817736  | -2.624488 | -8.663683 |
| Au | -0.470447 | -2.829943 | -6.091869 |
| Au | -1.758630 | -3.035398 | -3.520055 |
| Au | -3.046813 | -3.240853 | -0.948240 |
| Au | -4.334995 | -3.446308 | 1.623574  |
| Au | -0.004285 | -0.238601 | -7.268090 |
| Au | -1.292468 | -0.444056 | -4.696275 |
| Au | -2.580651 | -0.649511 | -2.124461 |
| Au | -3.868834 | -0.854966 | 0.447353  |
| Au | -0.826306 | 2.147286  | -5.872497 |
| Au | -2.114489 | 1.941831  | -3.300682 |
| Au | -3.402672 | 1.736376  | -0.728867 |
| Au | -1.648327 | 4.533173  | -4.476902 |
| Au | -2.936509 | 4.327718  | -1.905089 |
| Au | -2.470347 | 6.919060  | -3.081309 |

**50\_FHI-aims\_Junction\_C3.xyz ///** -39762559.745518416 eV

215

# xyz file created automatically from geometry.in.

|    |             |             |             |
|----|-------------|-------------|-------------|
| Au | 19.63096971 | 8.52863625  | 20.23277317 |
| Au | 17.67809286 | 8.12829604  | 22.07969069 |
| Au | 20.38831953 | 8.28627689  | 22.87558777 |
| Au | 18.85759214 | 10.75339515 | 21.67590069 |
| Au | 15.69280700 | 7.86783400  | 23.94929100 |
| Au | 18.44947800 | 7.97698200  | 24.78876200 |
| Au | 21.20614900 | 8.08613100  | 25.62823200 |
| Au | 17.16566800 | 10.33858000 | 23.74447000 |
| Au | 19.92233800 | 10.44772800 | 24.58394000 |
| Au | 18.63852900 | 12.80932600 | 23.53964800 |
| Au | 21.39519900 | 12.91847400 | 24.37911900 |
| Au | 13.597539   | 7.596707    | 25.911993   |
| Au | 16.354210   | 7.705855    | 26.751463   |
| Au | 19.110879   | 7.815004    | 27.590934   |
| Au | 21.867550   | 7.924152    | 28.430404   |
| Au | 15.070399   | 10.067453   | 25.707171   |
| Au | 17.827070   | 10.176601   | 26.546642   |
| Au | 20.583741   | 10.285750   | 27.386112   |

|    |             |             |             |
|----|-------------|-------------|-------------|
| Au | 16.543260   | 12.538199   | 25.502350   |
| Au | 19.299930   | 12.647347   | 26.341820   |
| Au | 18.016121   | 15.008945   | 25.297528   |
| Au | 13.786589   | 12.429050   | 24.662880   |
| Au | 11.502270   | 7.325580    | 27.874695   |
| Au | 14.258940   | 7.434728    | 28.714165   |
| Au | 17.015611   | 7.543877    | 29.553635   |
| Au | 19.772282   | 7.653025    | 30.393106   |
| Au | 22.528952   | 7.762174    | 31.232576   |
| Au | 12.975131   | 9.796326    | 27.669873   |
| Au | 15.731802   | 9.905474    | 28.509344   |
| Au | 18.488472   | 10.014623   | 29.348814   |
| Au | 21.245142   | 10.123771   | 30.188284   |
| Au | 14.447991   | 12.267072   | 27.465051   |
| Au | 17.204662   | 12.376220   | 28.304522   |
| Au | 19.961333   | 12.485369   | 29.143993   |
| Au | 15.920852   | 14.737818   | 27.260230   |
| Au | 18.677522   | 14.846966   | 28.099700   |
| Au | 17.393713   | 17.208564   | 27.055409   |
| S  | 20.60741826 | 8.30137766  | 18.02179278 |
| C  | 9.13200717  | 9.12495728  | 8.65078035  |
| C  | 7.75036352  | 8.36458615  | 10.66211580 |
| C  | 9.01783265  | 7.86859900  | 7.74330244  |
| C  | 8.08180631  | 6.84705991  | 7.95613385  |
| H  | 7.33954830  | 6.94143150  | 8.74731296  |
| C  | 8.06687110  | 5.69973891  | 7.15978932  |
| C  | 8.98376106  | 5.52300878  | 6.11044367  |
| C  | 9.89498707  | 6.56894784  | 5.86558218  |
| H  | 10.62703680 | 6.46925368  | 5.06174047  |
| C  | 9.90679132  | 7.71394172  | 6.66068089  |
| C  | 10.49650296 | 9.89983879  | 10.67062428 |
| C  | 10.37063236 | 9.00852873  | 9.58608571  |
| C  | 11.37329983 | 8.04135386  | 9.43106617  |
| H  | 11.31506315 | 7.31843132  | 8.61853771  |
| C  | 12.45871176 | 7.97363046  | 10.30993933 |
| C  | 12.58938654 | 8.86927391  | 11.38380676 |
| C  | 11.57861208 | 9.83786479  | 11.54429797 |
| H  | 11.61883576 | 10.52727595 | 12.38950906 |
| C  | 5.79900193  | 10.29826093 | 10.28458507 |
| C  | 9.25147079  | 10.36479823 | 7.72349463  |
| C  | 10.20536533 | 11.37627795 | 7.90173361  |
| H  | 10.95187493 | 11.29004236 | 8.69023190  |
| C  | 10.23411499 | 12.50088458 | 7.07269656  |
| C  | 9.31078757  | 12.66419640 | 6.02686312  |
| C  | 8.37506351  | 11.63066063 | 5.82336494  |
| H  | 7.63338102  | 11.72140657 | 5.02755655  |

|   |             |             |             |
|---|-------------|-------------|-------------|
| C | 8.35256556  | 10.50775985 | 6.64759627  |
| C | 5.65252491  | 9.40007107  | 11.35402606 |
| C | 6.65853435  | 8.42804601  | 11.52331538 |
| H | 6.60346188  | 7.73648312  | 12.36596458 |
| C | 7.88923295  | 9.25503616  | 9.57827157  |
| C | 6.89287927  | 10.22740655 | 9.41605644  |
| H | 6.96045470  | 10.95165232 | 8.60541228  |
| C | 8.99111806  | 4.27645617  | 5.31103691  |
| C | 9.21799130  | 4.28458633  | 3.92173836  |
| C | 9.21436503  | 3.10168232  | 3.18402953  |
| C | 8.99166453  | 1.85530663  | 3.80250638  |
| C | 8.77615501  | 1.84907133  | 5.19478669  |
| C | 8.77230334  | 3.03068304  | 5.93036965  |
| H | 8.64717231  | 0.89758871  | 5.71348442  |
| H | 8.63661556  | 2.98723067  | 7.01255617  |
| H | 9.34958438  | 3.14797772  | 2.10192412  |
| H | 9.35895676  | 5.23626867  | 3.40571857  |
| C | 4.50254811  | 9.47684099  | 12.28396778 |
| C | 3.91054113  | 8.31033122  | 12.80455718 |
| C | 2.84863965  | 8.37969512  | 13.70312831 |
| C | 3.97333427  | 10.71603234 | 12.69233776 |
| C | 2.91303060  | 10.78555893 | 13.59317858 |
| H | 2.51935825  | 11.76206481 | 13.88082083 |
| H | 4.28255429  | 7.33299945  | 12.49158054 |
| H | 4.41655990  | 11.63978727 | 12.31587135 |
| H | 2.42915065  | 7.45626675  | 14.10645671 |
| C | 13.73594771 | 8.79743790  | 12.31896406 |
| C | 14.30174072 | 7.56269102  | 12.69205415 |
| C | 14.29697297 | 9.96530995  | 12.87091274 |
| C | 15.37211722 | 9.90161175  | 13.75346768 |
| C | 15.93653083 | 8.66662777  | 14.12647210 |
| C | 15.37662239 | 7.49775048  | 13.57572445 |
| H | 15.80036085 | 6.52428247  | 13.82873429 |
| H | 13.87930143 | 6.63708857  | 12.29761589 |
| H | 13.89304463 | 10.93981025 | 12.59196894 |
| H | 15.76653248 | 10.82558062 | 14.17984300 |
| C | 9.31436829  | 13.88198119 | 5.18310568  |
| C | 9.01015948  | 13.83029714 | 3.80889726  |
| C | 8.99524310  | 14.98508801 | 3.02898048  |
| C | 9.28879657  | 16.24409186 | 3.58786752  |
| C | 9.59967638  | 16.29599515 | 4.96018103  |
| C | 9.60978955  | 15.14209377 | 5.73952839  |
| H | 8.81457616  | 12.86585594 | 3.33716309  |
| H | 8.79046240  | 14.90451499 | 1.95989294  |
| H | 9.79282698  | 17.26079281 | 5.43268703  |
| H | 9.81036041  | 15.22214924 | 6.80912312  |

|   |             |             |             |
|---|-------------|-------------|-------------|
| C | 17.07754022 | 8.60288999  | 15.06776850 |
| C | 17.18977214 | 7.56096871  | 16.01182149 |
| C | 18.25677311 | 7.50269076  | 16.90260628 |
| C | 19.24784182 | 8.49783904  | 16.87418346 |
| C | 19.15975886 | 9.54150061  | 15.94585595 |
| C | 18.08487095 | 9.58459193  | 15.05605137 |
| H | 16.41006055 | 6.80046331  | 16.07156588 |
| H | 18.30982565 | 6.69587578  | 17.63593493 |
| H | 19.91989777 | 10.31975620 | 15.89659525 |
| H | 18.04488432 | 10.38910816 | 14.32036809 |
| C | 1.22964006  | 9.69214439  | 15.11262181 |
| C | 0.17747634  | 8.75245783  | 15.11263613 |
| C | -0.84521257 | 8.81132852  | 16.05250156 |
| C | -0.85381818 | 9.81704122  | 17.04022671 |
| C | 0.18545962  | 10.76124139 | 17.05030840 |
| C | 1.20406087  | 10.69430609 | 16.09871229 |
| C | 2.33068597  | 9.61912033  | 14.12686362 |
| H | 0.14713660  | 7.97703438  | 14.34506937 |
| H | -1.65290226 | 8.07717852  | 16.02203742 |
| H | 0.21762886  | 11.54620988 | 17.80500416 |
| H | 2.01724837  | 11.42081953 | 16.14712945 |
| C | 9.26503230  | 17.47561965 | 2.76652331  |
| C | 8.29398927  | 17.66460450 | 1.76202874  |
| C | 8.25091288  | 18.83367770 | 1.00855422  |
| C | 9.19663247  | 19.84718067 | 1.23241753  |
| C | 10.18106931 | 19.67599552 | 2.21344911  |
| C | 10.20264327 | 18.50488996 | 2.97171570  |
| H | 7.53496062  | 16.89902427 | 1.59515062  |
| H | 7.47421664  | 18.96760661 | 0.25365261  |
| H | 10.93982768 | 20.43781473 | 2.38827395  |
| H | 10.98716758 | 18.37592194 | 3.71897054  |
| C | 8.98330475  | 0.59355350  | 3.02976679  |
| C | 8.11786016  | -0.46069333 | 3.37334515  |
| C | 8.10954293  | -1.66424279 | 2.66767675  |
| C | 8.98086822  | -1.85262310 | 1.58265357  |
| C | 9.84928405  | -0.80233196 | 1.22228882  |
| C | 9.84589366  | 0.39360266  | 1.93157008  |
| H | 7.41267532  | -0.33034955 | 4.19619488  |
| H | 7.41259015  | -2.44695797 | 2.96506578  |
| H | 10.54113475 | -0.93622390 | 0.38823926  |
| H | 10.55108008 | 1.17757708  | 1.64981358  |
| S | 9.07622345  | -3.32668556 | 0.61210646  |
| C | 7.91161517  | -4.45050925 | 1.42680360  |
| H | 7.97494469  | -5.38851799 | 0.86170337  |
| H | 6.88160475  | -4.07507685 | 1.37574672  |
| H | 8.20111273  | -4.64177287 | 2.46803186  |

|    |             |             |             |
|----|-------------|-------------|-------------|
| C  | 21.58908919 | 9.81444856  | 17.80342519 |
| H  | 22.38828403 | 9.74846871  | 18.55054485 |
| H  | 20.98533320 | 10.70880317 | 17.99103200 |
| H  | 22.02791710 | 9.82561187  | 16.79863496 |
| C  | 10.03940695 | 22.55957227 | 1.07674709  |
| H  | 9.90757178  | 23.47912375 | 0.49488529  |
| H  | 11.10153361 | 22.29536989 | 1.09254253  |
| H  | 9.64222010  | 22.69634028 | 2.08981950  |
| S  | -2.19594348 | 9.78343520  | 18.18999008 |
| C  | -1.86105268 | 11.19124738 | 19.28040895 |
| H  | -2.68235063 | 11.19234686 | 20.00748129 |
| H  | -1.87282343 | 12.14029373 | 18.72947763 |
| H  | -0.91162605 | 11.06857986 | 19.81707208 |
| H  | 8.52662066  | 7.62044919  | 10.84885719 |
| H  | 5.03462029  | 11.05789825 | 10.11056134 |
| H  | 7.61394619  | 9.72657649  | 6.45891141  |
| H  | 11.00949912 | 13.25306412 | 7.22953543  |
| H  | 7.30928105  | 4.93593143  | 7.34476569  |
| H  | 10.63166271 | 8.50090058  | 6.44379608  |
| H  | 13.22808241 | 7.21837144  | 10.13942100 |
| H  | 9.71501090  | 10.64017215 | 10.85001991 |
| S  | 9.04508265  | 21.30666848 | 0.20967727  |
| Au | 10.29032127 | 20.83246183 | -1.80158368 |
| Au | 12.31254133 | 19.37633289 | -2.90539660 |
| Au | 10.13871521 | 20.27944910 | -4.48294388 |
| Au | 12.15307591 | 22.25904874 | -3.26559087 |
| Au | 14.40265700 | 18.02284300 | -4.02346100 |
| Au | 12.18590700 | 18.88227200 | -5.65541000 |
| Au | 9.96915700  | 19.74170200 | -7.28735900 |
| Au | 14.03857000 | 20.82452200 | -4.60129300 |
| Au | 11.82182100 | 21.68395200 | -6.23324100 |
| Au | 13.67448300 | 23.62620100 | -5.17912500 |
| Au | 11.45773300 | 24.48563100 | -6.81107400 |
| Au | 16.595417   | 16.577950   | -5.215076   |
| Au | 14.378667   | 17.437380   | -6.847025   |
| Au | 12.161918   | 18.296809   | -8.478974   |
| Au | 9.945168    | 19.156239   | -10.110923  |
| Au | 16.231330   | 19.379629   | -5.792908   |
| Au | 14.014580   | 20.239059   | -7.424857   |
| Au | 11.797830   | 21.098489   | -9.056806   |
| Au | 15.867243   | 22.181309   | -6.370740   |
| Au | 13.650493   | 23.040738   | -8.002689   |
| Au | 15.503156   | 24.982988   | -6.948572   |
| Au | 11.433743   | 23.900168   | -9.634638   |
| Au | 18.788177   | 15.133057   | -6.406692   |
| Au | 16.571427   | 15.992487   | -8.038640   |

|    |           |           |            |
|----|-----------|-----------|------------|
| Au | 14.354677 | 16.851917 | -9.670589  |
| Au | 12.137927 | 17.711346 | -11.302539 |
| Au | 9.921178  | 18.570776 | -12.934487 |
| Au | 18.424090 | 17.934737 | -6.984523  |
| Au | 16.207340 | 18.794166 | -8.616473  |
| Au | 13.990590 | 19.653596 | -10.248421 |
| Au | 11.773840 | 20.513026 | -11.880370 |
| Au | 18.060003 | 20.736416 | -7.562355  |
| Au | 15.843253 | 21.595846 | -9.194304  |
| Au | 13.626503 | 22.455275 | -10.826253 |
| Au | 17.695916 | 23.538095 | -8.140187  |
| Au | 15.479166 | 24.397525 | -9.772136  |
| Au | 17.331829 | 26.339774 | -8.718019  |

**51\_FHI-aims\_Junction\_Si2\_-2SMe.xyz ///** -39720501.768030971 eV

167

# xyz file created automatically from geometry.in.

|    |             |             |             |
|----|-------------|-------------|-------------|
| Au | -3.09056274 | 8.71671718  | -6.66950561 |
| Au | -5.66728912 | 8.39884528  | -7.47927655 |
| Au | -5.07602607 | 9.43931591  | -4.89147071 |
| Au | -4.44672744 | 11.00517677 | -7.42858321 |
| Au | -8.24814400 | 8.15358900  | -8.31976500 |
| Au | -7.68860000 | 9.16902200  | -5.67937400 |
| Au | -7.12905500 | 10.18445500 | -3.03898300 |
| Au | -7.08898100 | 10.77447700 | -7.99860400 |
| Au | -6.52943700 | 11.78991000 | -5.35821400 |
| Au | -5.92981900 | 13.39536500 | -7.67744400 |
| Au | -5.37027400 | 14.41079800 | -5.03705300 |
| Au | -10.976917  | 7.883381    | -9.212315   |
| Au | -10.417372  | 8.898814    | -6.571924   |
| Au | -9.857828   | 9.914247    | -3.931534   |
| Au | -9.298283   | 10.929680   | -1.291143   |
| Au | -9.817754   | 10.504269   | -8.891155   |
| Au | -9.258210   | 11.519702   | -6.250764   |
| Au | -8.698665   | 12.535135   | -3.610373   |
| Au | -8.658591   | 13.125157   | -8.569994   |
| Au | -8.099047   | 14.140590   | -5.929604   |
| Au | -7.499428   | 15.746045   | -8.248833   |
| Au | -9.218136   | 12.109724   | -11.210384  |
| Au | -13.705690  | 7.613174    | -10.104864  |
| Au | -13.146145  | 8.628606    | -7.464474   |
| Au | -12.586601  | 9.644039    | -4.824084   |
| Au | -12.027056  | 10.659472   | -2.183693   |
| Au | -11.467511  | 11.674905   | 0.456697    |
| Au | -12.546527  | 10.234062   | -9.783704   |

|    |             |             |             |
|----|-------------|-------------|-------------|
| Au | -11.986982  | 11.249495   | -7.143313   |
| Au | -11.427438  | 12.264927   | -4.502923   |
| Au | -10.867893  | 13.280360   | -1.862533   |
| Au | -11.387364  | 12.854949   | -9.462544   |
| Au | -10.827819  | 13.870382   | -6.822153   |
| Au | -10.268275  | 14.885815   | -4.181762   |
| Au | -10.228201  | 15.475837   | -9.141383   |
| Au | -9.668656   | 16.491270   | -6.500993   |
| Au | -9.069038   | 18.096725   | -8.820223   |
| S  | -0.83269973 | 7.86017620  | -6.65943686 |
| Si | -0.53923399 | -0.98177114 | -0.39339632 |
| C  | -2.26132259 | -1.69367054 | 1.79935765  |
| C  | -0.54691266 | -2.52259548 | -1.49437649 |
| C  | -1.44093707 | -3.58776585 | -1.27394498 |
| H  | -2.18333247 | -3.51500941 | -0.47570837 |
| C  | -1.41709463 | -4.73404647 | -2.07064459 |
| C  | -0.49529143 | -4.86423332 | -3.12587279 |
| C  | 0.39812006  | -3.79978003 | -3.35550051 |
| H  | 1.13735420  | -3.88276442 | -4.15485009 |
| C  | 0.36977793  | -2.65499524 | -2.55827718 |
| C  | 0.95508587  | -0.27375457 | 1.97779619  |
| C  | 0.91307541  | -1.08742642 | 0.82620846  |
| C  | 1.92652474  | -2.05451797 | 0.68363624  |
| H  | 1.93580674  | -2.70581795 | -0.19317280 |
| C  | 2.91114930  | -2.22628677 | 1.65739431  |
| C  | 2.92591595  | -1.43488640 | 2.82106661  |
| C  | 1.94177092  | -0.43624598 | 2.95162265  |
| H  | 1.91229326  | 0.17855461  | 3.85349685  |
| C  | -4.37184607 | -0.03704063 | 1.05681668  |
| C  | -0.45508771 | 0.53850109  | -1.52487003 |
| C  | 0.24037319  | 1.71592157  | -1.19102444 |
| H  | 0.84052711  | 1.75358197  | -0.27864153 |
| C  | 0.19481156  | 2.84506375  | -2.01132786 |
| C  | -0.55313248 | 2.84550793  | -3.20464181 |
| C  | -1.23856375 | 1.66573149  | -3.55150167 |
| H  | -1.84537539 | 1.63962528  | -4.45873889 |
| C  | -1.18643152 | 0.53935515  | -2.73073019 |
| C  | -4.50490983 | -0.83103103 | 2.21109925  |
| C  | -3.42680699 | -1.66465911 | 2.56561987  |
| H  | -3.49036349 | -2.26829045 | 3.47321861  |
| C  | -2.12251787 | -0.90011659 | 0.64152241  |
| C  | -3.20616704 | -0.07275104 | 0.28974581  |
| H  | -3.14123150 | 0.55992791  | -0.59857212 |
| C  | -0.46972448 | -6.07981505 | -3.97603990 |
| C  | -0.26310038 | -5.98530355 | -5.36565757 |
| C  | -0.24515666 | -7.12848217 | -6.16715267 |

|   |             |             |             |
|---|-------------|-------------|-------------|
| C | -0.42936996 | -8.39151827 | -5.59546859 |
| C | -0.63326237 | -8.50096901 | -4.21609807 |
| C | -0.65512069 | -7.35778595 | -3.41470171 |
| H | -0.76866708 | -9.48325454 | -3.76016026 |
| H | -0.79170106 | -7.45541210 | -2.33619417 |
| H | -0.09532498 | -7.03191331 | -7.24381971 |
| H | -0.14503308 | -5.00179023 | -5.82411853 |
| C | -5.73607407 | -0.78098792 | 3.03694481  |
| C | -6.27626086 | -1.95142051 | 3.60332054  |
| C | -7.43394864 | -1.90050623 | 4.38217738  |
| C | -8.07329092 | -0.67847823 | 4.61527485  |
| C | -6.39149533 | 0.44164339  | 3.27819592  |
| C | -7.54653414 | 0.49251011  | 4.06059691  |
| H | -8.03218819 | 1.45214408  | 4.24540964  |
| H | -5.79786468 | -2.91275876 | 3.40725411  |
| H | -5.97260608 | 1.36375337  | 2.87130542  |
| H | -7.84329596 | -2.82045887 | 4.80300503  |
| C | 3.91091633  | -1.68771044 | 3.89964905  |
| C | 4.27491976  | -3.00414986 | 4.23567824  |
| C | 4.49241675  | -0.63780364 | 4.63898986  |
| C | 5.40101503  | -0.89090687 | 5.66327585  |
| C | 5.74396577  | -2.21466175 | 5.98446591  |
| C | 5.17527628  | -3.27362507 | 5.26704846  |
| H | 5.41074601  | -4.30934923 | 5.50718592  |
| H | 3.81805800  | -3.83999664 | 3.70393642  |
| H | 4.25055869  | 0.39640944  | 4.38959139  |
| H | 5.84875232  | -0.06052040 | 6.21199477  |
| C | 7.35180197  | -4.20098040 | 7.21640044  |
| H | 8.10678314  | -4.35333202 | 7.99617340  |
| H | 7.78152354  | -4.42659272 | 6.23291369  |
| H | 6.48261336  | -4.83198836 | 7.42859522  |
| C | -0.62530514 | 4.04771886  | -4.06924000 |
| C | -0.67216426 | 3.93538888  | -5.47107325 |
| C | -0.75290461 | 5.06078180  | -6.29315182 |
| C | -0.77841133 | 6.33802405  | -5.71932066 |
| C | -0.73233579 | 6.47545950  | -4.32212494 |
| C | -0.66077594 | 5.34397908  | -3.51509362 |
| H | -0.62242822 | 2.94897077  | -5.93447260 |
| H | -0.78483803 | 4.92685062  | -7.37358851 |
| H | -0.76287500 | 7.46755325  | -3.86834989 |
| H | -0.65493637 | 5.46780827  | -2.43141537 |
| C | -0.54530730 | 7.32358234  | -8.37242792 |
| H | -0.53789915 | 8.24754332  | -8.96205832 |
| H | -1.34660783 | 6.67092730  | -8.73380233 |
| H | 0.43295754  | 6.83213348  | -8.43889996 |
| H | 0.76831488  | 3.73196074  | -1.73473067 |

|    |             |             |             |
|----|-------------|-------------|-------------|
| H  | -1.73254737 | -0.35709362 | -3.03482296 |
| H  | 1.07709910  | -1.84905183 | -2.77270466 |
| H  | -2.14492446 | -5.52825327 | -1.89289234 |
| H  | -5.20117910 | 0.60151394  | 0.74634175  |
| H  | -1.43553640 | -2.33173216 | 2.12483490  |
| H  | 0.17418950  | 0.47226930  | 2.14655672  |
| H  | 3.68350129  | -2.98420904 | 1.51156498  |
| H  | -0.41391021 | -9.28551185 | -6.22072323 |
| H  | -8.97643016 | -0.63815599 | 5.22599764  |
| S  | 6.93486260  | -2.43348667 | 7.30298531  |
| Au | 5.78633686  | -2.18205795 | 9.41457555  |
| Au | 3.66826158  | -3.02207609 | 10.90821077 |
| Au | 6.25103035  | -2.92095648 | 12.06328970 |
| Au | 4.81663148  | -0.38740886 | 11.24704140 |
| Au | 1.50300700  | -3.73516000 | 12.39061000 |
| Au | 4.11576500  | -3.70869200 | 13.61071500 |
| Au | 6.72852300  | -3.68222300 | 14.83081900 |
| Au | 2.83230900  | -1.22678800 | 12.89744800 |
| Au | 5.44506600  | -1.20031900 | 14.11755200 |
| Au | 4.16161000  | 1.28158400  | 13.40428500 |
| Au | 6.77436800  | 1.30805300  | 14.62438900 |
| Au | -0.807223   | -4.482795   | 13.946160   |
| Au | 1.805535    | -4.456327   | 15.166265   |
| Au | 4.418292    | -4.429858   | 16.386368   |
| Au | 7.031050    | -4.403390   | 17.606472   |
| Au | 0.522078    | -1.974423   | 14.452997   |
| Au | 3.134836    | -1.947954   | 15.673102   |
| Au | 5.747594    | -1.921486   | 16.893206   |
| Au | 1.851380    | 0.533949    | 14.959835   |
| Au | 4.464137    | 0.560418    | 16.179939   |
| Au | 3.180680    | 3.042321    | 15.466672   |
| Au | 7.076894    | 0.586886    | 17.400043   |
| Au | -3.117453   | -5.230430   | 15.501710   |
| Au | -0.504696   | -5.203961   | 16.721814   |
| Au | 2.108062    | -5.177493   | 17.941918   |
| Au | 4.720820    | -5.151025   | 19.162022   |
| Au | 7.333577    | -5.124556   | 20.382126   |
| Au | -1.788152   | -2.722058   | 16.008547   |
| Au | 0.824606    | -2.695589   | 17.228652   |
| Au | 3.437363    | -2.669121   | 18.448755   |
| Au | 6.050120    | -2.642653   | 19.668859   |
| Au | -0.458851   | -0.213686   | 16.515384   |
| Au | 2.153906    | -0.187217   | 17.735489   |
| Au | 4.766664    | -0.160749   | 18.955593   |
| Au | 0.870450    | 2.294686    | 17.022222   |
| Au | 3.483207    | 2.321155    | 18.242326   |

Au 2.199751 4.803059 17.529059

**52\_FHI-aims\_Junction\_Si2\_-2Ph2SMe.xyz ///** -39697497.094350062 eV

133

# xyz file created automatically from geometry.in.

|    |             |             |             |
|----|-------------|-------------|-------------|
| Au | -2.15554361 | 9.18399949  | -5.90175502 |
| Au | -4.85996497 | 9.45384705  | -5.82613374 |
| Au | -3.24239838 | 10.53485116 | -3.74986409 |
| Au | -3.17124004 | 11.65455117 | -6.60573003 |
| Au | -7.57028900 | 9.80503400  | -5.80097500 |
| Au | -5.95899900 | 10.87780700 | -3.66350900 |
| Au | -4.34770900 | 11.95058000 | -1.52604300 |
| Au | -5.83559500 | 12.05552800 | -6.29288200 |
| Au | -4.22430600 | 13.12830100 | -4.15541700 |
| Au | -4.10090200 | 14.30602100 | -6.78478900 |
| Au | -2.48961200 | 15.37879400 | -4.64732300 |
| Au | -10.430851  | 10.168664   | -5.772355   |
| Au | -8.819560   | 11.241438   | -3.634889   |
| Au | -7.208271   | 12.314210   | -1.497424   |
| Au | -5.596981   | 13.386984   | 0.640041    |
| Au | -8.696157   | 12.419158   | -6.264263   |
| Au | -7.084867   | 13.491931   | -4.126797   |
| Au | -5.473577   | 14.564704   | -1.989331   |
| Au | -6.961463   | 14.669652   | -6.756170   |
| Au | -5.350174   | 15.742424   | -4.618705   |
| Au | -5.226770   | 16.920145   | -7.248077   |
| Au | -8.572753   | 13.596878   | -8.893636   |
| Au | -13.291412  | 10.532295   | -5.743736   |
| Au | -11.680122  | 11.605068   | -3.606271   |
| Au | -10.068832  | 12.677841   | -1.468805   |
| Au | -8.457542   | 13.750614   | 0.668661    |
| Au | -6.846252   | 14.823387   | 2.806126    |
| Au | -11.556718  | 12.782788   | -6.235643   |
| Au | -9.945428   | 13.855561   | -4.098177   |
| Au | -8.334139   | 14.928334   | -1.960712   |
| Au | -6.722849   | 16.001107   | 0.176753    |
| Au | -9.822025   | 15.033282   | -6.727551   |
| Au | -8.210735   | 16.106055   | -4.590085   |
| Au | -6.599445   | 17.178828   | -2.452619   |
| Au | -8.087331   | 17.283775   | -7.219458   |
| Au | -6.476041   | 18.356548   | -5.081993   |
| Au | -6.352637   | 19.534269   | -7.711365   |
| S  | -0.18665597 | 7.86833571  | -6.34737142 |
| Si | -0.58006942 | -1.30785863 | -0.57864036 |
| C  | -0.29802345 | -2.70009729 | -1.82673920 |

|   |             |             |             |
|---|-------------|-------------|-------------|
| C | 0.79120877  | -0.42027129 | 1.80861388  |
| C | 0.76880560  | -1.35810300 | 0.75543833  |
| C | 1.74849987  | -2.36963146 | 0.77655592  |
| H | 1.78229321  | -3.11202462 | -0.02418946 |
| C | 2.69305825  | -2.45275510 | 1.80138859  |
| C | 2.69955791  | -1.51994037 | 2.85492634  |
| C | 1.73394033  | -0.49424805 | 2.83491880  |
| H | 1.69922929  | 0.22984763  | 3.65139727  |
| C | -0.52830699 | 0.35452687  | -1.49566598 |
| C | 0.64387226  | 1.13043242  | -1.58450274 |
| H | 1.54853320  | 0.80602836  | -1.06411496 |
| C | 0.68464890  | 2.30913756  | -2.33219322 |
| C | -0.45081960 | 2.76248233  | -3.03025615 |
| C | -1.63038301 | 1.99930458  | -2.93744329 |
| H | -2.53776350 | 2.34549442  | -3.43619408 |
| C | -1.66421050 | 0.82522685  | -2.18497575 |
| C | -2.26987166 | -1.52248380 | 0.24193509  |
| C | 3.68954586  | -1.62409976 | 3.95351600  |
| C | 4.06654364  | -2.87818041 | 4.46876867  |
| C | 4.28494388  | -0.47681372 | 4.51613747  |
| C | 5.22844596  | -0.57797974 | 5.53508128  |
| C | 5.59138437  | -1.84090612 | 6.03092169  |
| C | 4.99995829  | -2.99383085 | 5.49974387  |
| H | 5.24703823  | -3.98220913 | 5.88503417  |
| H | 3.59768713  | -3.78261048 | 4.07820641  |
| H | 4.03173988  | 0.50938271  | 4.12436258  |
| H | 5.69341547  | 0.32272081  | 5.93937305  |
| C | 7.40901024  | -3.58378262 | 7.34370421  |
| H | 8.21824696  | -3.60325592 | 8.08265503  |
| H | 7.80123642  | -3.84075910 | 6.35229777  |
| H | 6.62111398  | -4.27682192 | 7.65507617  |
| C | -0.40770446 | 3.99824488  | -3.84768729 |
| C | -1.09293046 | 4.07633659  | -5.07614050 |
| C | -1.05773647 | 5.22973065  | -5.85882743 |
| C | -0.31209860 | 6.33577917  | -5.43003881 |
| C | 0.37877126  | 6.28117631  | -4.20952482 |
| C | 0.32258552  | 5.12820645  | -3.42953220 |
| H | -1.64782044 | 3.20952029  | -5.43793553 |
| H | -1.60587455 | 5.25347322  | -6.80037041 |
| H | 0.95573110  | 7.14339933  | -3.87138471 |
| H | 0.84404817  | 5.10974485  | -2.47151504 |
| C | -0.35468393 | 7.33934134  | -8.08300914 |
| H | -0.19204761 | 8.24616755  | -8.67704580 |
| H | -1.35238739 | 6.94430397  | -8.29672154 |
| H | 0.42300771  | 6.59876757  | -8.30420547 |
| H | 1.61966960  | 2.86876548  | -2.40215950 |

|    |             |             |             |
|----|-------------|-------------|-------------|
| H  | -2.60513924 | 0.27154597  | -2.13242619 |
| H  | 0.05016411  | 0.38318589  | 1.83915812  |
| H  | 3.45188107  | -3.23732240 | 1.77195879  |
| H  | -1.07122709 | -2.66140849 | -2.60770092 |
| H  | -0.35380847 | -3.69018509 | -1.35105783 |
| H  | 0.67729911  | -2.60875343 | -2.32545009 |
| H  | -3.08352201 | -1.52326544 | -0.49773386 |
| H  | -2.47175540 | -0.71956023 | 0.96479727  |
| H  | -2.30915802 | -2.47945759 | 0.78177935  |
| S  | 6.82636971  | -1.85994717 | 7.32708888  |
| Au | 5.67513483  | -1.56499945 | 9.42692622  |
| Au | 3.55749854  | -2.33876545 | 10.95242700 |
| Au | 6.15788304  | -2.23173557 | 12.08376437 |
| Au | 4.72056970  | 0.29451069  | 11.20394642 |
| Au | 1.40321800  | -2.99862900 | 12.47731100 |
| Au | 4.02982300  | -2.95588400 | 13.66684100 |
| Au | 6.65642700  | -2.91313900 | 14.85637000 |
| Au | 2.75353900  | -0.48603400 | 12.90081500 |
| Au | 5.38014300  | -0.44328800 | 14.09034400 |
| Au | 4.10385900  | 2.02656200  | 13.32431800 |
| Au | 6.73046400  | 2.06930700  | 14.51384800 |
| Au | -0.893670   | -3.688942   | 14.078445   |
| Au | 1.732934    | -3.646197   | 15.267974   |
| Au | 4.359538    | -3.603452   | 16.457504   |
| Au | 6.986142    | -3.560707   | 17.647033   |
| Au | 0.456650    | -1.176347   | 14.501948   |
| Au | 3.083255    | -1.133602   | 15.691478   |
| Au | 5.709859    | -1.090857   | 16.881008   |
| Au | 1.806971    | 1.336248    | 14.925452   |
| Au | 4.433575    | 1.378993    | 16.114981   |
| Au | 3.157291    | 3.848844    | 15.348955   |
| Au | 7.060179    | 1.421739    | 17.304511   |
| Au | -3.190558   | -4.379256   | 15.679578   |
| Au | -0.563955   | -4.336511   | 16.869108   |
| Au | 2.062650    | -4.293766   | 18.058637   |
| Au | 4.689254    | -4.251020   | 19.248167   |
| Au | 7.315857    | -4.208275   | 20.437696   |
| Au | -1.840238   | -1.866661   | 16.103082   |
| Au | 0.786366    | -1.823915   | 17.292611   |
| Au | 3.412970    | -1.781170   | 18.482141   |
| Au | 6.039574    | -1.738425   | 19.671671   |
| Au | -0.489918   | 0.645935    | 16.526585   |
| Au | 2.136686    | 0.688680    | 17.716115   |
| Au | 4.763291    | 0.731425    | 18.905645   |
| Au | 0.860403    | 3.158530    | 16.950089   |
| Au | 3.487007    | 3.201275    | 18.139618   |

Au 2.210723 5.671126 17.373592

**53\_FHI-aims\_Junction\_Si2\_diMe.xyz ///** -39752952.856112286 eV

199

# xyz file created automatically from geometry.in.

|    |             |             |             |
|----|-------------|-------------|-------------|
| Au | -3.32610042 | 8.47829706  | -7.00544402 |
| Au | -5.70885207 | 7.90222836  | -8.17532319 |
| Au | -5.60759548 | 8.79712708  | -5.48044044 |
| Au | -4.82588336 | 10.63419279 | -7.85100773 |
| Au | -8.11587900 | 7.43138100  | -9.38903700 |
| Au | -8.04344200 | 8.30062800  | -6.64039700 |
| Au | -7.97100500 | 9.16987500  | -3.89175700 |
| Au | -7.32687100 | 10.13062000 | -8.75073100 |
| Au | -7.25443400 | 10.99986700 | -6.00209300 |
| Au | -6.53786200 | 12.82985900 | -8.11242700 |
| Au | -6.46542500 | 13.69910500 | -5.36378700 |
| Au | -10.647283  | 6.935808    | -10.678324  |
| Au | -10.574846  | 7.805055    | -7.929684   |
| Au | -10.502409  | 8.674301    | -5.181045   |
| Au | -10.429971  | 9.543548    | -2.432405   |
| Au | -9.858274   | 9.635046    | -10.040019  |
| Au | -9.785837   | 10.504293   | -7.291379   |
| Au | -9.713400   | 11.373540   | -4.542739   |
| Au | -9.069266   | 12.334285   | -9.401713   |
| Au | -8.996829   | 13.203532   | -6.653074   |
| Au | -8.280258   | 15.033523   | -8.763409   |
| Au | -9.141703   | 11.465038   | -12.150353  |
| Au | -13.178686  | 6.440234    | -11.967610  |
| Au | -13.106249  | 7.309481    | -9.218971   |
| Au | -13.033812  | 8.178728    | -6.470331   |
| Au | -12.961375  | 9.047975    | -3.721692   |
| Au | -12.888938  | 9.917221    | -0.973053   |
| Au | -12.389678  | 9.139473    | -11.329306  |
| Au | -12.317241  | 10.008720   | -8.580666   |
| Au | -12.244804  | 10.877966   | -5.832027   |
| Au | -12.172367  | 11.747213   | -3.083387   |
| Au | -11.600670  | 11.838711   | -10.691001  |
| Au | -11.528232  | 12.707958   | -7.942361   |
| Au | -11.455795  | 13.577205   | -5.193721   |
| Au | -10.811661  | 14.537950   | -10.052695  |
| Au | -10.739224  | 15.407197   | -7.304056   |
| Au | -10.022653  | 17.237188   | -9.414391   |
| S  | -0.95586348 | 8.11747532  | -6.72415451 |
| Si | -0.50058601 | -0.69310557 | -0.42973759 |
| C  | -2.36204993 | -1.61701900 | 1.66176568  |

|   |             |             |             |
|---|-------------|-------------|-------------|
| C | -0.36547566 | -2.22240413 | -1.55934768 |
| C | -1.34717514 | -3.22616149 | -1.47418745 |
| H | -2.14801157 | -3.11583163 | -0.73699052 |
| C | -1.39641703 | -4.34917715 | -2.31352762 |
| C | -0.40119270 | -4.47143318 | -3.31165361 |
| C | 0.57889731  | -3.46790642 | -3.41019946 |
| H | 1.34958610  | -3.57666185 | -4.17829616 |
| C | 0.62371241  | -2.34949391 | -2.56951817 |
| C | 1.02460123  | 0.21155911  | 1.92616584  |
| C | 0.94560662  | -0.67692990 | 0.82164269  |
| C | 1.89464902  | -1.71325999 | 0.74464106  |
| H | 1.84531295  | -2.40969801 | -0.09707911 |
| C | 2.89047070  | -1.93730159 | 1.70525132  |
| C | 2.93969052  | -1.06420962 | 2.81567205  |
| C | 2.02706331  | 0.00164937  | 2.88410375  |
| H | 2.07291656  | 0.66861524  | 3.74959240  |
| C | -4.26294745 | 0.42716079  | 1.06636008  |
| C | -0.50319589 | 0.83647049  | -1.57676190 |
| C | 0.43647256  | 1.86207689  | -1.37041772 |
| H | 1.17249403  | 1.74618874  | -0.56888424 |
| C | 0.51210635  | 3.02688555  | -2.14965381 |
| C | -0.41430952 | 3.16914595  | -3.20753705 |
| C | -1.32810058 | 2.13002636  | -3.45304645 |
| H | -2.03843475 | 2.24979039  | -4.27554284 |
| C | -1.39453997 | 0.96750502  | -2.67576854 |
| C | -4.50380739 | -0.47494957 | 2.12893678  |
| C | -3.55207446 | -1.47783762 | 2.38747344  |
| H | -3.73945732 | -2.16223110 | 3.21948034  |
| C | -2.10821607 | -0.71113501 | 0.59746947  |
| C | -3.07114042 | 0.28230281  | 0.34302238  |
| H | -2.89059357 | 0.99692326  | -0.46428776 |
| C | -0.36195526 | -5.59026452 | -4.29048291 |
| C | -0.27695114 | -5.31893897 | -5.66690677 |
| C | -0.20484668 | -6.34150102 | -6.61530055 |
| C | -0.20443690 | -7.68384875 | -6.20504727 |
| C | -0.28344527 | -7.97021987 | -4.82748732 |
| C | -0.36517378 | -6.94226791 | -3.89350560 |
| H | -0.27102013 | -9.00878973 | -4.49044393 |
| H | -0.40326239 | -7.19294697 | -2.83236669 |
| H | -0.15396070 | -6.08131691 | -7.67206342 |
| H | -0.28686381 | -4.28100276 | -6.00595940 |
| S | -0.11348057 | -9.07267105 | -7.29617085 |
| C | 0.05642446  | -8.31910758 | -8.93469753 |
| H | 0.13835813  | -9.16256997 | -9.63116098 |
| H | 0.96641828  | -7.70964526 | -9.00431336 |
| H | -0.82687520 | -7.72462039 | -9.20089757 |

|   |              |             |             |
|---|--------------|-------------|-------------|
| C | -5.71773295  | -0.40232682 | 2.98269577  |
| C | -6.50209247  | -1.54813264 | 3.22616103  |
| C | -7.62916004  | -1.49473040 | 4.04059594  |
| C | -8.01053041  | -0.28492986 | 4.65432419  |
| C | -6.10502035  | 0.79492346  | 3.60758434  |
| C | -7.22879985  | 0.86026608  | 4.43292858  |
| H | -7.48343137  | 1.80868384  | 4.90435599  |
| H | -6.23288880  | -2.49199732 | 2.74779699  |
| H | -5.50263549  | 1.69370449  | 3.46833401  |
| H | -8.22787936  | -2.39392688 | 4.19949053  |
| S | -9.46202637  | -0.32861726 | 5.66291189  |
| C | -9.64857191  | 1.38929334  | 6.20674017  |
| H | -10.55540998 | 1.39846540  | 6.82384054  |
| H | -9.79025294  | 2.06723565  | 5.35551847  |
| H | -8.79913568  | 1.71378768  | 6.82117154  |
| C | 3.90538391   | -1.25466671 | 3.93312482  |
| C | 3.92799254   | -2.45445345 | 4.66670313  |
| C | 4.79258642   | -0.23092000 | 4.31532874  |
| C | 5.68590697   | -0.40588594 | 5.37187570  |
| C | 5.69181626   | -1.61292080 | 6.08740820  |
| C | 4.80053547   | -2.63598035 | 5.74043041  |
| H | 4.76927878   | -3.57001086 | 6.30035433  |
| H | 3.22885010   | -3.25213187 | 4.41185827  |
| H | 4.79969589   | 0.70686106  | 3.75728448  |
| H | 6.38344800   | 0.39039152  | 5.63696075  |
| C | 7.06528662   | -3.53871626 | 7.65125952  |
| H | 7.86582545   | -3.65252942 | 8.39140005  |
| H | 7.36812299   | -3.99001961 | 6.69868838  |
| H | 6.15027688   | -3.99841813 | 8.03756721  |
| C | -0.47754855  | 4.37184522  | -4.08065288 |
| C | -0.45962773  | 4.23982919  | -5.48091763 |
| C | -0.59606872  | 5.34587024  | -6.32220467 |
| C | -0.74672089  | 6.62110225  | -5.76504850 |
| C | -0.75465639  | 6.77892302  | -4.36987814 |
| C | -0.62487702  | 5.66540165  | -3.54407939 |
| H | -0.33201139  | 3.24939063  | -5.92125660 |
| H | -0.58607256  | 5.19913172  | -7.40165322 |
| H | -0.87468202  | 7.77159084  | -3.93221595 |
| H | -0.66297319  | 5.79945689  | -2.46254714 |
| C | -0.37957902  | 7.65152575  | -8.38576024 |
| H | -0.43977122  | 8.57195637  | -8.97779136 |
| H | -1.01953714  | 6.88868826  | -8.84043144 |
| H | 0.66182400   | 7.31388510  | -8.32241619 |
| C | 1.58416625   | 4.04989807  | -1.85326919 |
| C | -2.38951402  | -0.09924278 | -3.07364707 |
| C | 1.69566963   | -1.31090348 | -2.81564807 |

|    |             |             |             |
|----|-------------|-------------|-------------|
| C  | -2.52217526 | -5.34320603 | -2.14952641 |
| C  | -5.24293408 | 1.50155905  | 0.65343016  |
| C  | -1.38360340 | -2.68816703 | 2.09007616  |
| C  | 0.03335850  | 1.32865174  | 2.16225617  |
| C  | 3.86986320  | -3.07185254 | 1.50843264  |
| H  | 1.94715136  | 4.53914595  | -2.76698173 |
| H  | 2.43867718  | 3.57245352  | -1.35513797 |
| H  | 1.22211160  | 4.84383245  | -1.18114382 |
| H  | -3.15822378 | 0.31619429  | -3.73918867 |
| H  | -2.89564839 | -0.54979287 | -2.21028189 |
| H  | -1.88832973 | -0.92056269 | -3.60852259 |
| H  | 2.53902839  | -1.74715535 | -3.36838092 |
| H  | 2.08760004  | -0.87824185 | -1.88564820 |
| H  | 1.30170551  | -0.47340111 | -3.41212352 |
| H  | -2.83906292 | -5.76384749 | -3.11304795 |
| H  | -3.38935269 | -4.86381996 | -1.67573366 |
| H  | -2.23005446 | -6.18963015 | -1.50792086 |
| H  | -5.12095280 | 1.73768574  | -0.41230476 |
| H  | -5.08810980 | 2.43873606  | 1.21074299  |
| H  | -6.28232526 | 1.19209802  | 0.82426216  |
| H  | -0.89878757 | -3.18224019 | 1.23771382  |
| H  | -1.88991428 | -3.45902660 | 2.68709933  |
| H  | -0.57950334 | -2.26056418 | 2.70901979  |
| H  | -0.29446112 | 1.80657939  | 1.23060006  |
| H  | 0.46580254  | 2.10310166  | 2.81053272  |
| H  | -0.87271436 | 0.94615835  | 2.65733270  |
| H  | 3.94156538  | -3.33210035 | 0.44412070  |
| H  | 3.55938349  | -3.98310739 | 2.04327034  |
| H  | 4.87429797  | -2.81153339 | 1.86863245  |
| S  | 6.87909801  | -1.74208626 | 7.42250677  |
| Au | 5.79332991  | -0.96046218 | 9.42926782  |
| Au | 3.59092847  | -1.23233496 | 11.01041139 |
| Au | 6.16069463  | -0.97217494 | 12.17908919 |
| Au | 4.90181618  | 1.32776760  | 10.66700708 |
| Au | 1.36160400  | -1.39208500 | 12.56109200 |
| Au | 3.95421700  | -1.18422700 | 13.80648900 |
| Au | 6.54683000  | -0.97636900 | 15.05188500 |
| Au | 2.83792200  | 1.08069000  | 12.41369000 |
| Au | 5.43053300  | 1.28854800  | 13.65908600 |
| Au | 4.31423800  | 3.55346500  | 12.26628700 |
| Au | 6.90685000  | 3.76132400  | 13.51168400 |
| Au | -1.011567   | -1.559572   | 14.190773   |
| Au | 1.581045    | -1.351714   | 15.436170   |
| Au | 4.173657    | -1.143856   | 16.681566   |
| Au | 6.766270    | -0.935998   | 17.926963   |
| Au | 0.464749    | 0.913204    | 14.043371   |

|    |           |           |           |
|----|-----------|-----------|-----------|
| Au | 3.057362  | 1.121062  | 15.288768 |
| Au | 5.649974  | 1.328920  | 16.534164 |
| Au | 1.941066  | 3.385979  | 13.895969 |
| Au | 4.533678  | 3.593837  | 15.141365 |
| Au | 3.417382  | 5.858754  | 13.748566 |
| Au | 7.126290  | 3.801695  | 16.386762 |
| Au | -3.384739 | -1.727058 | 15.820455 |
| Au | -0.792127 | -1.519200 | 17.065851 |
| Au | 1.800486  | -1.311342 | 18.311248 |
| Au | 4.393098  | -1.103484 | 19.556645 |
| Au | 6.985710  | -0.895626 | 20.802041 |
| Au | -1.908423 | 0.745717  | 15.673052 |
| Au | 0.684190  | 0.953575  | 16.918449 |
| Au | 3.276802  | 1.161433  | 18.163846 |
| Au | 5.869414  | 1.369291  | 19.409242 |
| Au | -0.432106 | 3.218492  | 15.525650 |
| Au | 2.160506  | 3.426351  | 16.771047 |
| Au | 4.753119  | 3.634209  | 18.016444 |
| Au | 1.044211  | 5.691268  | 15.378248 |
| Au | 3.636822  | 5.899126  | 16.623644 |
| Au | 2.520527  | 8.164043  | 15.230845 |

**54\_FHI-aims\_Junction\_Os1h\_sim.xyz ///** -40180631.634713791 eV

151

|    |            |           |           |
|----|------------|-----------|-----------|
| Au | -7.589680  | 0.833650  | -0.326640 |
| Au | -8.932933  | 0.079121  | -2.764306 |
| Au | -8.519170  | -1.872886 | -0.682403 |
| Au | -10.416540 | 0.264503  | -0.298459 |
| Au | -10.276185 | -0.675407 | -5.201972 |
| Au | -9.862422  | -2.627415 | -3.120068 |
| Au | -9.448659  | -4.579422 | -1.038164 |
| Au | -11.759792 | -0.490026 | -2.736125 |
| Au | -11.346029 | -2.442033 | -0.654221 |
| Au | -13.243398 | -0.304644 | -0.270278 |
| Au | -12.829636 | -2.256652 | 1.811626  |
| Au | -11.619438 | -1.429936 | -7.639638 |
| Au | -11.205675 | -3.381944 | -5.557734 |
| Au | -10.791912 | -5.333951 | -3.475831 |
| Au | -10.378150 | -7.285959 | -1.393927 |
| Au | -13.103045 | -1.244554 | -5.173791 |
| Au | -12.689282 | -3.196562 | -3.091887 |
| Au | -12.275519 | -5.148570 | -1.009983 |
| Au | -14.586651 | -1.059173 | -2.707944 |
| Au | -14.172889 | -3.011180 | -0.626041 |

|    |            |           |            |
|----|------------|-----------|------------|
| Au | -16.070258 | -0.873791 | -0.242097  |
| Au | -15.000414 | 0.892835  | -4.789848  |
| Au | -12.962691 | -2.184465 | -10.077304 |
| Au | -12.548928 | -4.136472 | -7.995401  |
| Au | -12.135165 | -6.088480 | -5.913497  |
| Au | -11.721402 | -8.040488 | -3.831593  |
| Au | -11.307640 | -9.992495 | -1.749689  |
| Au | -14.446297 | -1.999083 | -7.611457  |
| Au | -14.032535 | -3.951091 | -5.529553  |
| Au | -13.618772 | -5.903098 | -3.447650  |
| Au | -13.205009 | -7.855106 | -1.365746  |
| Au | -15.929904 | -1.813701 | -5.145611  |
| Au | -15.516141 | -3.765709 | -3.063707  |
| Au | -15.102379 | -5.717717 | -0.981803  |
| Au | -17.413511 | -1.628320 | -2.679763  |
| Au | -16.999748 | -3.580327 | -0.597860  |
| Au | -18.897118 | -1.442938 | -0.213917  |
| S  | -5.67786   | 2.34456   | 0.71004    |
| C  | 0.19568    | -2.08819  | 1.74610    |
| C  | -0.68747   | -3.16336  | 2.07482    |
| C  | -0.47995   | -3.83334  | 3.29020    |
| H  | -1.16273   | -4.64681  | 3.56255    |
| C  | 0.57200    | -3.49771  | 4.15649    |
| H  | 0.69368    | -4.04540  | 5.09726    |
| C  | 1.47814    | -2.47848  | 3.82370    |
| C  | 1.27476    | -1.78917  | 2.61121    |
| H  | 1.98011    | -1.00440  | 2.32162    |
| C  | -1.77750   | -3.63389  | 1.13576    |
| H  | -1.36033   | -4.29000  | 0.35169    |
| H  | -2.27823   | -2.80317  | 0.61041    |
| H  | -2.54812   | -4.20680  | 1.67590    |
| C  | 2.65310    | -2.14447  | 4.71305    |
| H  | 2.49185    | -2.50168  | 5.74240    |
| H  | 2.83746    | -1.05875  | 4.75301    |
| H  | 3.58064    | -2.61533  | 4.34177    |
| C  | -1.66423   | 0.13698   | 0.21933    |
| C  | -1.97451   | 1.21784   | -0.67454   |
| C  | -3.19443   | 1.88616   | -0.51701   |
| H  | -3.42700   | 2.68755   | -1.22496   |
| C  | -4.10342   | 1.56889   | 0.51597    |
| C  | -3.79503   | 0.53333   | 1.43878    |
| C  | -2.58134   | -0.14231  | 1.27054    |
| H  | -2.33743   | -0.92729  | 1.99343    |
| C  | -1.04005   | 1.66998   | -1.77682   |
| H  | -0.07086   | 2.00201   | -1.36967   |
| H  | -1.47986   | 2.50856   | -2.33880   |

|    |          |          |          |
|----|----------|----------|----------|
| H  | -0.82220 | 0.86277  | -2.49698 |
| C  | -4.75149 | 0.14644  | 2.53787  |
| H  | -5.72529 | -0.16961 | 2.11840  |
| H  | -4.95434 | 0.99073  | 3.22068  |
| H  | -4.34664 | -0.68518 | 3.13333  |
| C  | 1.56249  | 0.15798  | -0.10589 |
| C  | 1.87325  | 1.25661  | 0.76578  |
| C  | 3.09092  | 1.92383  | 0.58928  |
| H  | 3.32641  | 2.73885  | 1.28055  |
| C  | 3.99447  | 1.58939  | -0.44362 |
| C  | 3.68020  | 0.54130  | -1.35039 |
| C  | 2.46846  | -0.13300 | -1.16272 |
| H  | 2.21036  | -0.92375 | -1.87432 |
| C  | 0.93868  | 1.72606  | 1.86040  |
| H  | 0.72691  | 0.93147  | 2.59607  |
| H  | -0.03364 | 2.04256  | 1.44788  |
| H  | 1.37309  | 2.57902  | 2.40467  |
| C  | 4.62785  | 0.14174  | -2.45261 |
| H  | 5.60564  | -0.16755 | -2.03713 |
| H  | 4.82394  | 0.97760  | -3.14758 |
| H  | 4.21965  | -0.69812 | -3.03408 |
| C  | -0.24356 | -2.16794 | -1.55158 |
| C  | 0.63662  | -3.25683 | -1.84471 |
| C  | 0.40631  | -3.97834 | -3.02861 |
| H  | 1.08116  | -4.80809 | -3.26995 |
| C  | -0.65105 | -3.67824 | -3.89948 |
| H  | -0.78561 | -4.27080 | -4.81092 |
| C  | -1.54652 | -2.63797 | -3.60423 |
| C  | -1.32723 | -1.90116 | -2.42427 |
| H  | -2.03345 | -1.10555 | -2.16756 |
| C  | 1.76705  | -3.68208 | -0.93039 |
| H  | 2.33239  | -4.51402 | -1.37856 |
| H  | 1.38880  | -4.02003 | 0.04916  |
| H  | 2.48254  | -2.86656 | -0.72748 |
| C  | -2.72770 | -2.33581 | -4.49687 |
| H  | -3.55191 | -3.05033 | -4.32376 |
| H  | -2.45580 | -2.40758 | -5.56277 |
| H  | -3.12588 | -1.32605 | -4.31107 |
| Os | -0.04065 | -1.00253 | 0.07349  |
| C  | 5.60875  | 3.64968  | 0.62805  |
| C  | -5.70062 | 3.62473  | -0.58797 |
| H  | 6.60950  | 4.09756  | 0.55033  |
| H  | 5.49479  | 3.20623  | 1.62679  |
| H  | 4.83584  | 4.40728  | 0.43122  |
| H  | -6.69850 | 4.08051  | -0.51986 |
| H  | -5.58437 | 3.17202  | -1.58224 |

|    |           |           |           |
|----|-----------|-----------|-----------|
| H  | -4.92329  | 4.37833   | -0.39313  |
| S  | 5.56940   | 2.35852   | -0.65867  |
| Au | 7.486370  | 0.847760  | 0.370820  |
| Au | 8.044768  | -1.561099 | 1.854548  |
| Au | 9.840958  | -0.704017 | -0.232308 |
| Au | 9.685118  | 0.779850  | 2.235426  |
| Au | 8.603164  | -3.969957 | 3.338276  |
| Au | 10.399355 | -3.112875 | 1.251420  |
| Au | 12.195545 | -2.255793 | -0.835436 |
| Au | 10.243515 | -1.629008 | 3.719153  |
| Au | 12.039704 | -0.771927 | 1.632298  |
| Au | 11.883864 | 0.711940  | 4.100031  |
| Au | 13.680055 | 1.569022  | 2.013175  |
| Au | 9.161562  | -6.378816 | 4.822004  |
| Au | 10.957752 | -5.521734 | 2.735148  |
| Au | 12.753942 | -4.664652 | 0.648292  |
| Au | 14.550133 | -3.807570 | -1.438564 |
| Au | 10.801912 | -4.037867 | 5.202882  |
| Au | 12.598102 | -3.180785 | 3.116026  |
| Au | 14.394292 | -2.323703 | 1.029170  |
| Au | 12.442262 | -1.696919 | 5.583759  |
| Au | 14.238452 | -0.839837 | 3.496904  |
| Au | 14.082612 | 0.644030  | 5.964637  |
| Au | 16.034642 | 0.017245  | 1.410048  |
| Au | 9.719960  | -8.787675 | 6.305732  |
| Au | 11.516150 | -7.930593 | 4.218876  |
| Au | 13.312340 | -7.073511 | 2.132020  |
| Au | 15.108530 | -6.216428 | 0.045164  |
| Au | 16.904720 | -5.359347 | -2.041692 |
| Au | 11.360310 | -6.446726 | 6.686610  |
| Au | 13.156500 | -5.589644 | 4.599754  |
| Au | 14.952690 | -4.732562 | 2.512898  |
| Au | 16.748880 | -3.875480 | 0.426042  |
| Au | 13.000659 | -4.105778 | 7.067488  |
| Au | 14.796850 | -3.248696 | 4.980632  |
| Au | 16.593040 | -2.391613 | 2.893776  |
| Au | 14.641010 | -1.764829 | 7.448365  |
| Au | 16.437199 | -0.907747 | 5.361510  |
| Au | 16.281359 | 0.576120  | 7.829243  |

**55\_FHI-aims\_Junction\_Os1h\_diff.xyz ///** -40180631.655162871 eV

151

|    |           |           |           |
|----|-----------|-----------|-----------|
| Au | -7.066270 | -1.940330 | 0.316590  |
| Au | -9.784494 | -2.089380 | -0.634673 |

|    |            |           |           |
|----|------------|-----------|-----------|
| Au | -9.211943  | -0.851899 | 1.906327  |
| Au | -8.426528  | 0.452917  | -0.542435 |
| Au | -12.502717 | -2.238431 | -1.585936 |
| Au | -11.930166 | -1.000950 | 0.955064  |
| Au | -11.357615 | 0.236532  | 3.496064  |
| Au | -11.144751 | 0.303867  | -1.493697 |
| Au | -10.572200 | 1.541348  | 1.047302  |
| Au | -9.786785  | 2.846164  | -1.401459 |
| Au | -9.214234  | 4.083646  | 1.139541  |
| Au | -15.220940 | -2.387481 | -2.537199 |
| Au | -14.648389 | -1.150000 | 0.003801  |
| Au | -14.075839 | 0.087481  | 2.544801  |
| Au | -13.503287 | 1.324963  | 5.085801  |
| Au | -13.862975 | 0.154816  | -2.444961 |
| Au | -13.290424 | 1.392297  | 0.096039  |
| Au | -12.717873 | 2.629779  | 2.637040  |
| Au | -12.505009 | 2.697114  | -2.352722 |
| Au | -11.932458 | 3.934595  | 0.188277  |
| Au | -11.147043 | 5.239411  | -2.260484 |
| Au | -13.077560 | 1.459632  | -4.893723 |
| Au | -17.939164 | -2.536532 | -3.488462 |
| Au | -17.366613 | -1.299051 | -0.947462 |
| Au | -16.794062 | -0.061569 | 1.593538  |
| Au | -16.221511 | 1.175912  | 4.134538  |
| Au | -15.648960 | 2.413394  | 6.675538  |
| Au | -16.581198 | 0.005766  | -3.396224 |
| Au | -16.008647 | 1.243247  | -0.855223 |
| Au | -15.436096 | 2.480728  | 1.685776  |
| Au | -14.863545 | 3.718210  | 4.226777  |
| Au | -15.223233 | 2.548063  | -3.303986 |
| Au | -14.650682 | 3.785545  | -0.762985 |
| Au | -14.078131 | 5.023026  | 1.778015  |
| Au | -13.865267 | 5.090361  | -3.211747 |
| Au | -13.292716 | 6.327842  | -0.670747 |
| Au | -12.507301 | 7.632659  | -3.119509 |
| S  | -4.76485   | -3.17259  | 0.39814   |
| C  | 1.71656    | 0.60854   | -0.51354  |
| C  | 2.90909    | 1.39609   | -0.63795  |
| C  | 4.09894    | 0.76187   | -1.01123  |
| H  | 5.00024    | 1.37687   | -1.09090  |
| C  | 4.15916    | -0.62087  | -1.29174  |
| C  | 2.99589    | -1.42711  | -1.14707  |
| C  | 1.81255    | -0.79063  | -0.75810  |
| H  | 0.91881    | -1.41167  | -0.63744  |
| C  | 2.93722    | 2.87618   | -0.32566  |
| H  | 2.95134    | 3.05014   | 0.76445   |

|   |          |          |          |
|---|----------|----------|----------|
| H | 2.04954  | 3.39652  | -0.72158 |
| H | 3.83167  | 3.35639  | -0.75378 |
| C | 3.03711  | -2.91549 | -1.38077 |
| H | 3.79544  | -3.39647 | -0.73462 |
| H | 3.30595  | -3.15939 | -2.42429 |
| H | 2.06081  | -3.37431 | -1.16413 |
| C | -0.71155 | 2.78768  | -1.24579 |
| C | -1.93983 | 3.49136  | -1.04998 |
| C | -2.32063 | 4.43133  | -2.02152 |
| H | -3.25917 | 4.97944  | -1.87907 |
| C | -1.55087 | 4.67397  | -3.16842 |
| C | -0.35501 | 3.97149  | -3.39167 |
| C | 0.04281  | 3.03362  | -2.41929 |
| H | 0.96877  | 2.47003  | -2.57701 |
| C | -2.85238 | 3.21991  | 0.12467  |
| H | -3.32905 | 2.22863  | 0.03108  |
| H | -3.65360 | 3.97297  | 0.18587  |
| H | -2.30855 | 3.22405  | 1.08426  |
| C | 0.49487  | 4.23050  | -4.61415 |
| H | 1.21208  | 5.05186  | -4.43590 |
| H | -0.12275 | 4.52157  | -5.47896 |
| H | 1.08066  | 3.34087  | -4.89542 |
| C | -1.45346 | 0.00364  | 0.02393  |
| C | -1.84939 | -0.72737 | -1.14652 |
| C | -2.84998 | -1.69632 | -1.02415 |
| H | -3.14592 | -2.24097 | -1.92519 |
| C | -3.47660 | -1.98057 | 0.20966  |
| C | -3.14305 | -1.22780 | 1.37053  |
| C | -2.14816 | -0.25286 | 1.23984  |
| H | -1.88738 | 0.33013  | 2.12919  |
| C | -1.26840 | -0.43233 | -2.50992 |
| H | -0.16678 | -0.39659 | -2.48845 |
| H | -1.60901 | 0.55290  | -2.87241 |
| H | -1.57211 | -1.19094 | -3.24830 |
| C | -3.84084 | -1.45151 | 2.68823  |
| H | -3.74629 | -2.49790 | 3.02887  |
| H | -4.92315 | -1.23467 | 2.61076  |
| H | -3.42033 | -0.80130 | 3.46999  |
| C | 0.36221  | 2.07715  | 1.87529  |
| C | 0.81459  | 1.27451  | 2.97043  |
| C | 1.05066  | 1.91971  | 4.19567  |
| H | 1.38957  | 1.31630  | 5.04570  |
| C | 0.87253  | 3.30099  | 4.36643  |
| H | 1.06568  | 3.75448  | 5.34462  |
| C | 0.45773  | 4.10721  | 3.29533  |
| C | 0.21085  | 3.47470  | 2.06037  |

|    |           |            |          |
|----|-----------|------------|----------|
| H  | -0.10759  | 4.09298    | 1.21292  |
| C  | 1.07280   | -0.21057   | 2.85186  |
| H  | 1.40265   | -0.62753   | 3.81614  |
| H  | 1.85726   | -0.42038   | 2.10528  |
| H  | 0.17385   | -0.76656   | 2.53480  |
| C  | 0.29887   | 5.60288    | 3.43995  |
| H  | 1.17940   | 6.13932    | 3.04329  |
| H  | 0.18527   | 5.89562    | 4.49562  |
| H  | -0.58000  | 5.97113    | 2.88612  |
| Os | -0.03084  | 1.38587    | 0.03244  |
| C  | -4.85797  | -3.99406   | -1.22727 |
| H  | -5.66890  | -4.72966   | -1.12949 |
| H  | -3.90802  | -4.50427   | -1.44476 |
| H  | -5.12001  | -3.27633   | -2.01665 |
| C  | 6.89731   | -0.13915   | -1.80103 |
| H  | -1.89193  | 5.41293    | -3.90186 |
| H  | 7.83451   | -0.64720   | -2.06802 |
| H  | 7.00409   | 0.30197    | -0.80029 |
| H  | 6.65048   | 0.62222    | -2.55567 |
| S  | 5.63562   | -1.45478   | -1.78712 |
| Au | 6.721320  | -2.912860  | 0.154690 |
| Au | 6.271692  | -5.077874  | 2.005745 |
| Au | 8.877715  | -4.704929  | 0.828712 |
| Au | 7.897684  | -2.827783  | 2.786189 |
| Au | 5.822063  | -7.242888  | 3.856800 |
| Au | 8.428087  | -6.869943  | 2.679766 |
| Au | 11.034111 | -6.496997  | 1.502732 |
| Au | 7.448056  | -4.992797  | 4.637243 |
| Au | 10.054079 | -4.619851  | 3.460210 |
| Au | 9.074048  | -2.742705  | 5.417687 |
| Au | 11.680072 | -2.369759  | 4.240654 |
| Au | 5.372435  | -9.407903  | 5.707855 |
| Au | 7.978459  | -9.034957  | 4.530821 |
| Au | 10.584483 | -8.662011  | 3.353788 |
| Au | 13.190507 | -8.289066  | 2.176754 |
| Au | 6.998427  | -7.157811  | 6.488299 |
| Au | 9.604451  | -6.784865  | 5.311265 |
| Au | 12.210476 | -6.411920  | 4.134231 |
| Au | 8.624420  | -4.907719  | 7.268742 |
| Au | 11.230443 | -4.534774  | 6.091709 |
| Au | 10.250412 | -2.657628  | 8.049186 |
| Au | 13.836468 | -4.161828  | 4.914675 |
| Au | 4.922807  | -11.572917 | 7.558909 |
| Au | 7.528831  | -11.199971 | 6.381876 |
| Au | 10.134855 | -10.827026 | 5.204843 |
| Au | 12.740879 | -10.454080 | 4.027809 |

|    |           |            |           |
|----|-----------|------------|-----------|
| Au | 15.346902 | -10.081134 | 2.850776  |
| Au | 6.548799  | -9.322825  | 8.339353  |
| Au | 9.154824  | -8.949880  | 7.162320  |
| Au | 11.760847 | -8.576934  | 5.985287  |
| Au | 14.366871 | -8.203988  | 4.808253  |
| Au | 8.174792  | -7.072734  | 9.119797  |
| Au | 10.780816 | -6.699788  | 7.942764  |
| Au | 13.386840 | -6.326842  | 6.765730  |
| Au | 9.800784  | -4.822642  | 9.900241  |
| Au | 12.406808 | -4.449697  | 8.723208  |
| Au | 11.426777 | -2.572551  | 10.680685 |

**56\_FHI-aims\_Junction\_Si1h\_sim.xyz ///** -39695243.291097976 eV

127

|    |            |           |          |
|----|------------|-----------|----------|
| Au | -7.051630  | 1.375380  | 0.677270 |
| Au | -9.551495  | -0.058904 | 0.580512 |
| Au | -7.649036  | -0.617076 | 2.674539 |
| Au | -9.083657  | 1.884420  | 2.659088 |
| Au | -12.051360 | -1.493187 | 0.483754 |
| Au | -10.148900 | -2.051359 | 2.577781 |
| Au | -8.246441  | -2.609532 | 4.671808 |
| Au | -11.583521 | 0.450136  | 2.562330 |
| Au | -9.681062  | -0.108036 | 4.656356 |
| Au | -11.115683 | 2.393459  | 4.640906 |
| Au | -9.213223  | 1.835287  | 6.734933 |
| Au | -14.551225 | -2.927471 | 0.386996 |
| Au | -12.648765 | -3.485643 | 2.481023 |
| Au | -10.746306 | -4.043815 | 4.575049 |
| Au | -8.843847  | -4.601987 | 6.669076 |
| Au | -14.083387 | -0.984147 | 2.465572 |
| Au | -12.180927 | -1.542320 | 4.559599 |
| Au | -10.278467 | -2.100492 | 6.653626 |
| Au | -13.615548 | 0.959176  | 4.544148 |
| Au | -11.713089 | 0.401004  | 6.638175 |
| Au | -13.147710 | 2.902499  | 6.622724 |
| Au | -15.518008 | 1.517348  | 2.450121 |
| Au | -17.051090 | -4.361754 | 0.290239 |
| Au | -15.148631 | -4.919926 | 2.384265 |
| Au | -13.246171 | -5.478099 | 4.478292 |
| Au | -11.343712 | -6.036271 | 6.572319 |
| Au | -9.441253  | -6.594443 | 8.666345 |
| Au | -16.583252 | -2.418431 | 2.368814 |
| Au | -14.680792 | -2.976603 | 4.462841 |
| Au | -12.778333 | -3.534776 | 6.556868 |

|    |            |           |          |
|----|------------|-----------|----------|
| Au | -10.875873 | -4.092948 | 8.650895 |
| Au | -16.115414 | -0.475108 | 4.447390 |
| Au | -14.212954 | -1.033280 | 6.541417 |
| Au | -12.310494 | -1.591452 | 8.635444 |
| Au | -15.647575 | 1.468215  | 6.525966 |
| Au | -13.745116 | 0.910043  | 8.619993 |
| Au | -15.179737 | 3.411539  | 8.604542 |
| S  | -5.13881   | 2.46345   | -0.77053 |
| C  | 1.44967    | -0.49708  | 0.53351  |
| C  | 1.70146    | 0.74482   | -0.09786 |
| C  | 2.86130    | 1.47754   | 0.16404  |
| C  | 3.80861    | 0.98129   | 1.08373  |
| C  | 3.57123    | -0.23561  | 1.74721  |
| C  | 2.39952    | -0.95426  | 1.47121  |
| Si | -0.05915   | -1.53309  | 0.03427  |
| C  | -0.49372   | -2.78237  | 1.39044  |
| C  | -1.51380   | -0.35149  | -0.25488 |
| C  | 0.32179    | -2.46916  | -1.56819 |
| C  | 0.25912    | -3.97134  | 1.53984  |
| C  | -1.56123   | -2.55834  | 2.28868  |
| C  | -1.82931   | 0.67375   | 0.67004  |
| C  | -2.34682   | -0.48268  | -1.38701 |
| C  | -0.42105   | -3.62534  | -1.90371 |
| C  | 1.30748    | -2.02685  | -2.47830 |
| C  | -0.03552   | -4.89304  | 2.55510  |
| C  | -1.86148   | -3.48013  | 3.30170  |
| C  | -2.93123   | 1.51277   | 0.48667  |
| C  | -3.45564   | 0.34921   | -1.59032 |
| C  | -0.19466   | -4.30740  | -3.10795 |
| C  | 1.53866    | -2.70820  | -3.68197 |
| C  | -1.09723   | -4.64768  | 3.43847  |
| C  | -3.75120   | 1.35316   | -0.65100 |
| C  | 0.78584    | -3.84827  | -3.99947 |
| H  | 0.97600    | 1.14977   | -0.81209 |
| H  | 3.04601    | 2.42383   | -0.35450 |
| H  | 4.28838    | -0.63444  | 2.46885  |
| H  | 2.22854    | -1.90053  | 1.99593  |
| H  | 1.07407    | -4.18859  | 0.83992  |
| H  | -2.17661   | -1.65738  | 2.19133  |
| H  | -1.19600   | 0.82570   | 1.55118  |
| H  | -2.13079   | -1.25551  | -2.13245 |
| H  | -1.17752   | -4.00530  | -1.20778 |
| H  | 1.90804    | -1.14225  | -2.23992 |
| H  | 0.55835    | -5.80768  | 2.65062  |
| H  | -2.69783   | -3.28911  | 3.98156  |
| H  | -3.16062   | 2.28990   | 1.22298  |

|    |           |           |            |
|----|-----------|-----------|------------|
| H  | -4.07820  | 0.20823   | -2.47615   |
| H  | -0.77959  | -5.20110  | -3.34785   |
| H  | 2.31098   | -2.35085  | -4.37044   |
| H  | -1.33288  | -5.36956  | 4.22676    |
| C  | -5.84767  | 2.10786   | -2.41165   |
| H  | -6.70335  | 2.79049   | -2.51137   |
| H  | -6.21014  | 1.07228   | -2.46433   |
| H  | -5.10613  | 2.31799   | -3.19660   |
| C  | 6.25812   | 1.05454   | 2.52080    |
| H  | 0.96706   | -4.38113  | -4.93830   |
| H  | 7.18685   | 1.63017   | 2.64039    |
| H  | 6.50621   | 0.04509   | 2.16324    |
| H  | 5.71345   | 1.02228   | 3.47621    |
| S  | 5.28576   | 1.96178   | 1.27274    |
| Au | 6.691300  | 1.279810  | -0.845040  |
| Au | 8.023243  | -0.898503 | -2.185465  |
| Au | 6.694353  | 1.145463  | -3.725630  |
| Au | 9.128924  | 1.761989  | -2.308375  |
| Au | 9.355186  | -3.076816 | -3.525888  |
| Au | 8.026296  | -1.032850 | -5.066054  |
| Au | 6.697405  | 1.011116  | -6.606220  |
| Au | 10.460867 | -0.416323 | -3.648798  |
| Au | 9.131977  | 1.627642  | -5.188964  |
| Au | 11.566548 | 2.244169  | -3.771709  |
| Au | 10.237658 | 4.288135  | -5.311874  |
| Au | 10.687129 | -5.255129 | -4.866313  |
| Au | 9.358239  | -3.211162 | -6.406478  |
| Au | 8.029349  | -1.167197 | -7.946644  |
| Au | 6.700458  | 0.876769  | -9.486810  |
| Au | 11.792811 | -2.594637 | -4.989223  |
| Au | 10.463920 | -0.550671 | -6.529388  |
| Au | 9.135029  | 1.493296  | -8.069554  |
| Au | 12.898491 | 0.065856  | -5.112133  |
| Au | 11.569601 | 2.109821  | -6.652298  |
| Au | 14.004173 | 2.726348  | -5.235043  |
| Au | 10.240711 | 4.153787  | -8.192464  |
| Au | 12.019072 | -7.433441 | -6.206737  |
| Au | 10.690182 | -5.389476 | -7.746902  |
| Au | 9.361292  | -3.345510 | -9.287068  |
| Au | 8.032401  | -1.301544 | -10.827234 |
| Au | 6.703511  | 0.742422  | -12.367399 |
| Au | 13.124754 | -4.772949 | -6.329647  |
| Au | 11.795863 | -2.728983 | -7.869813  |
| Au | 10.466973 | -0.685018 | -9.409978  |
| Au | 9.138082  | 1.358948  | -10.950144 |
| Au | 14.230435 | -2.112457 | -6.452557  |

|    |           |           |           |
|----|-----------|-----------|-----------|
| Au | 12.901544 | -0.068491 | -7.992723 |
| Au | 11.572654 | 1.975475  | -9.532889 |
| Au | 15.336116 | 0.548035  | -6.575468 |
| Au | 14.007226 | 2.592001  | -8.115633 |
| Au | 16.441797 | 3.208527  | -6.698378 |

**57\_FHI-aims\_Junction\_Si1h\_diff.xyz ///** -39695243.277062997 eV

127

|    |           |           |            |
|----|-----------|-----------|------------|
| Au | 7.143690  | -1.473740 | -0.623610  |
| Au | 9.928149  | -1.180637 | -1.314072  |
| Au | 8.107447  | -2.433529 | -3.166411  |
| Au | 7.932761  | 0.401325  | -2.667468  |
| Au | 12.712607 | -0.887533 | -2.004532  |
| Au | 10.891905 | -2.140425 | -3.856871  |
| Au | 9.071203  | -3.393318 | -5.709211  |
| Au | 10.717219 | 0.694428  | -3.357929  |
| Au | 8.896518  | -0.558464 | -5.210268  |
| Au | 8.721832  | 2.276390  | -4.711325  |
| Au | 6.901130  | 1.023498  | -6.563665  |
| Au | 15.497066 | -0.594430 | -2.694993  |
| Au | 13.676364 | -1.847322 | -4.547333  |
| Au | 11.855662 | -3.100214 | -6.399672  |
| Au | 10.034960 | -4.353107 | -8.252012  |
| Au | 13.501679 | 0.987532  | -4.048389  |
| Au | 11.680977 | -0.265360 | -5.900729  |
| Au | 9.860274  | -1.518253 | -7.753069  |
| Au | 11.506291 | 2.569493  | -5.401786  |
| Au | 9.685589  | 1.316601  | -7.254125  |
| Au | 9.510904  | 4.151455  | -6.755183  |
| Au | 13.326993 | 3.822386  | -3.549447  |
| Au | 18.281525 | -0.301326 | -3.385455  |
| Au | 16.460823 | -1.554218 | -5.237794  |
| Au | 14.640121 | -2.807111 | -7.090133  |
| Au | 12.819419 | -4.060003 | -8.942473  |
| Au | 10.998717 | -5.312895 | -10.794812 |
| Au | 16.286137 | 1.280636  | -4.738851  |
| Au | 14.465435 | 0.027743  | -6.591191  |
| Au | 12.644734 | -1.225149 | -8.443530  |
| Au | 10.824031 | -2.478041 | -10.295869 |
| Au | 14.290750 | 2.862597  | -6.092247  |
| Au | 12.470048 | 1.609705  | -7.944587  |
| Au | 10.649346 | 0.356812  | -9.796927  |
| Au | 12.295362 | 4.444559  | -7.445644  |
| Au | 10.474661 | 3.191667  | -9.297983  |

|    |           |          |           |
|----|-----------|----------|-----------|
| Au | 10.299975 | 6.026520 | -8.799040 |
| S  | 5.47586   | -1.91792 | 1.31617   |
| C  | -0.05073  | 2.93492  | 1.46675   |
| C  | 0.17973   | 2.69183  | 2.84190   |
| C  | 0.04630   | 3.71455  | 3.79216   |
| C  | -0.31768  | 5.00631  | 3.38383   |
| C  | -0.54612  | 5.26963  | 2.02561   |
| C  | -0.41269  | 4.24412  | 1.07833   |
| Si | 0.06561   | 1.53590  | 0.19535   |
| C  | 0.15805   | 2.21812  | -1.56662  |
| C  | 1.61985   | 0.50115  | 0.54335   |
| C  | -1.46455  | 0.42495  | 0.35021   |
| C  | -1.00773  | 2.62742  | -2.25590  |
| C  | 1.40266   | 2.36859  | -2.21878  |
| C  | 2.72884   | 1.02784  | 1.24707   |
| C  | 1.72472   | -0.82450 | 0.06529   |
| C  | -1.86100  | -0.44044 | -0.69927  |
| C  | -2.23503  | 0.39961  | 1.53303   |
| C  | -0.93056  | 3.17424  | -3.54504  |
| C  | 1.48287   | 2.91282  | -3.50834  |
| C  | 3.88207   | 0.27014  | 1.46965   |
| C  | 2.87646   | -1.59458 | 0.26250   |
| C  | -2.95538  | -1.29922 | -0.56919  |
| C  | -3.34065  | -0.44697 | 1.68084   |
| C  | 0.31576   | 3.31790  | -4.17242  |
| C  | 3.95808   | -1.05098 | 0.98181   |
| C  | -3.69822  | -1.31256 | 0.63099   |
| H  | 0.47655   | 1.69003  | 3.17383   |
| H  | 0.23071   | 3.50496  | 4.85069   |
| H  | -0.41940  | 5.80672  | 4.12342   |
| H  | -0.82588  | 6.27730  | 1.70251   |
| H  | -0.58924  | 4.46352  | 0.01975   |
| H  | -1.98983  | 2.50754  | -1.78440  |
| H  | 2.32098   | 2.04885  | -1.71391  |
| H  | 2.68838   | 2.04902  | 1.64044   |
| H  | 0.88462   | -1.27523 | -0.47450  |
| H  | -1.31670  | -0.43004 | -1.65024  |
| H  | -1.97827  | 1.06839  | 2.36171   |
| H  | -1.84442  | 3.48357  | -4.06217  |
| H  | 2.45676   | 3.01696  | -3.99694  |
| H  | 4.72452   | 0.69876  | 2.02194   |
| H  | 2.92161   | -2.60983 | -0.13835  |
| H  | -3.25094  | -1.94489 | -1.40288  |
| H  | -3.91226  | -0.42166 | 2.61094   |
| H  | 0.37642   | 3.74087  | -5.18013  |
| C  | 5.08154   | -3.65173 | 0.90384   |

|    |            |           |           |
|----|------------|-----------|-----------|
| C  | -5.79710   | -2.15999  | 2.33768   |
| H  | 5.97452    | -4.22900  | 1.18257   |
| H  | 4.90283    | -3.77206  | -0.17388  |
| H  | 4.21689    | -3.98501  | 1.49658   |
| H  | -6.66817   | -2.82800  | 2.39186   |
| H  | -6.13670   | -1.11971  | 2.43510   |
| H  | -5.07336   | -2.42561  | 3.12239   |
| S  | -5.07162   | -2.44437  | 0.69046   |
| Au | -6.984660  | -1.348070 | -0.750190 |
| Au | -9.013156  | -1.844348 | -2.738850 |
| Au | -9.487638  | 0.080128  | -0.644306 |
| Au | -7.583752  | 0.660168  | -2.731081 |
| Au | -11.041651 | -2.340627 | -4.727510 |
| Au | -11.516133 | -0.416151 | -2.632966 |
| Au | -11.990615 | 1.508326  | -0.538421 |
| Au | -9.612247  | 0.163890  | -4.719740 |
| Au | -10.086729 | 2.088365  | -2.625196 |
| Au | -8.182843  | 2.668405  | -4.711971 |
| Au | -8.657325  | 4.592881  | -2.617426 |
| Au | -13.070147 | -2.836905 | -6.716170 |
| Au | -13.544629 | -0.912428 | -4.621626 |
| Au | -14.019111 | 1.012047  | -2.527082 |
| Au | -14.493592 | 2.936523  | -0.432537 |
| Au | -11.640743 | -0.332389 | -6.708401 |
| Au | -12.115225 | 1.592087  | -4.613856 |
| Au | -12.589707 | 3.516563  | -2.519312 |
| Au | -10.211339 | 2.172127  | -6.700631 |
| Au | -10.685821 | 4.096603  | -4.606087 |
| Au | -8.781935  | 4.676643  | -6.692861 |
| Au | -11.160302 | 6.021079  | -2.511542 |
| Au | -15.098643 | -3.333182 | -8.704830 |
| Au | -15.573125 | -1.408707 | -6.610287 |
| Au | -16.047607 | 0.515769  | -4.515742 |
| Au | -16.522088 | 2.440245  | -2.421197 |
| Au | -16.996570 | 4.364721  | -0.326653 |
| Au | -13.669239 | -0.828667 | -8.697061 |
| Au | -14.143721 | 1.095809  | -6.602516 |
| Au | -14.618202 | 3.020285  | -4.507973 |
| Au | -15.092684 | 4.944761  | -2.413428 |
| Au | -12.239835 | 1.675849  | -8.689292 |
| Au | -12.714317 | 3.600325  | -6.594747 |
| Au | -13.188798 | 5.524801  | -4.500202 |
| Au | -10.810431 | 4.180365  | -8.681521 |
| Au | -11.284913 | 6.104840  | -6.586978 |
| Au | -9.381027  | 6.684881  | -8.673752 |

58\_FHI-aims\_Junction\_C1h\_sim.xyz /// -39688378.423698835 eV

127

|    |           |           |          |
|----|-----------|-----------|----------|
| Au | 6.640320  | 1.243150  | 0.648350 |
| Au | 7.279981  | -0.663632 | 2.714959 |
| Au | 9.165491  | -0.148431 | 0.594753 |
| Au | 8.668913  | 1.861063  | 2.602538 |
| Au | 7.919641  | -2.570414 | 4.781568 |
| Au | 9.805151  | -2.055212 | 2.661362 |
| Au | 11.690661 | -1.540011 | 0.541155 |
| Au | 9.308574  | -0.045719 | 4.669147 |
| Au | 11.194083 | 0.469483  | 2.548940 |
| Au | 10.697506 | 2.478976  | 4.556725 |
| Au | 12.583016 | 2.994178  | 2.436519 |
| Au | 8.559302  | -4.477195 | 6.848178 |
| Au | 10.444812 | -3.961994 | 4.727971 |
| Au | 12.330322 | -3.446793 | 2.607765 |
| Au | 14.215832 | -2.931592 | 0.487558 |
| Au | 9.948234  | -1.952501 | 6.735756 |
| Au | 11.833744 | -1.437299 | 4.615550 |
| Au | 13.719255 | -0.922098 | 2.495343 |
| Au | 11.337167 | 0.572194  | 6.623335 |
| Au | 13.222676 | 1.087396  | 4.503128 |
| Au | 12.726099 | 3.096889  | 6.510913 |
| Au | 9.451657  | 0.056993  | 8.743541 |
| Au | 9.198963  | -6.383977 | 8.914787 |
| Au | 11.084473 | -5.868776 | 6.794581 |
| Au | 12.969983 | -5.353575 | 4.674374 |
| Au | 14.855493 | -4.838374 | 2.554167 |
| Au | 16.741003 | -4.323173 | 0.433961 |
| Au | 10.587895 | -3.859282 | 8.802366 |
| Au | 12.473406 | -3.344081 | 6.682159 |
| Au | 14.358915 | -2.828880 | 4.561953 |
| Au | 16.244425 | -2.313679 | 2.441746 |
| Au | 11.976827 | -1.334588 | 8.689944 |
| Au | 13.862338 | -0.819386 | 6.569738 |
| Au | 15.747848 | -0.304185 | 4.449531 |
| Au | 13.365760 | 1.190107  | 8.577523 |
| Au | 15.251270 | 1.705309  | 6.457316 |
| Au | 14.754692 | 3.714802  | 8.465101 |
| S  | 4.71055   | 2.23915   | -0.82578 |
| C  | -1.15861  | -0.70795  | 0.19755  |
| C  | -1.55928  | 0.13637   | -0.86356 |
| C  | -2.57601  | 1.08032   | -0.71233 |
| C  | -3.20226  | 1.23978   | 0.54070  |

|   |          |          |          |
|---|----------|----------|----------|
| C | -2.79866 | 0.42721  | 1.61802  |
| C | -1.79344 | -0.52922 | 1.44314  |
| C | 0.02492  | -1.68494 | -0.01808 |
| H | -1.06352 | 0.04942  | -1.83510 |
| H | -2.86894 | 1.69036  | -1.56967 |
| H | -3.27128 | 0.54305  | 2.59844  |
| H | -1.50123 | -1.14646 | 2.29591  |
| C | 0.24044  | -2.63907 | 1.18855  |
| C | 1.22251  | -0.72410 | -0.23361 |
| C | -0.20183 | -2.64172 | -1.21997 |
| C | -0.82387 | -3.47437 | 1.59505  |
| C | 1.48238  | -2.79434 | 1.83105  |
| C | 1.61980  | 0.12559  | 0.82579  |
| C | 1.88039  | -0.57218 | -1.46971 |
| C | 0.85201  | -3.49211 | -1.62286 |
| C | -1.44628 | -2.78710 | -1.85999 |
| C | -0.66218 | -4.40084 | 2.63075  |
| H | -1.78828 | -3.40514 | 1.08199  |
| C | 1.64888  | -3.73140 | 2.86388  |
| H | 2.33701  | -2.18563 | 1.52559  |
| C | 2.65805  | 1.04545  | 0.68182  |
| H | 1.10861  | 0.05539  | 1.79052  |
| C | 2.91321  | 0.35878  | -1.63570 |
| H | 1.58720  | -1.18953 | -2.32203 |
| C | 0.67876  | -4.42189 | -2.65372 |
| H | 1.81705  | -3.43277 | -1.10983 |
| C | -1.62465 | -3.72756 | -2.88774 |
| H | -2.29404 | -2.16862 | -1.55504 |
| C | 0.57801  | -4.53274 | 3.27471  |
| H | -1.50668 | -5.03042 | 2.92767  |
| H | 2.62746  | -3.83049 | 3.34373  |
| C | 3.31381  | 1.17244  | -0.56017 |
| H | 2.96059  | 1.65403  | 1.53754  |
| H | 3.40767  | 0.45456  | -2.60731 |
| C | -0.56335 | -4.54279 | -3.29604 |
| H | 1.51554  | -5.06309 | -2.94765 |
| H | -2.60518 | -3.81905 | -3.36518 |
| H | 0.70784  | -5.26050 | 4.08122  |
| H | -0.70231 | -5.27333 | -4.09852 |
| C | -4.40407 | 3.58584  | -0.49027 |
| C | 4.34965  | 3.67717  | 0.24532  |
| H | -5.17688 | 4.33908  | -0.28055 |
| H | -4.60757 | 3.13444  | -1.47071 |
| H | -3.40655 | 4.04833  | -0.46143 |
| H | 5.15380  | 4.40089  | 0.04873  |
| H | 4.37504  | 3.40414  | 1.30932  |

|    |            |           |           |
|----|------------|-----------|-----------|
| H  | 3.37624    | 4.10549   | -0.03508  |
| S  | -4.54490   | 2.35932   | 0.85336   |
| Au | -6.736510  | 1.199550  | 0.067690  |
| Au | -8.247509  | 0.330504  | -2.229590 |
| Au | -8.297116  | -1.221774 | 0.200189  |
| Au | -9.616625  | 1.340351  | 0.098840  |
| Au | -9.758508  | -0.538541 | -4.526871 |
| Au | -9.808115  | -2.090819 | -2.097091 |
| Au | -9.857722  | -3.643097 | 0.332689  |
| Au | -11.127624 | 0.471305  | -2.198440 |
| Au | -11.177231 | -1.080973 | 0.231339  |
| Au | -12.496739 | 1.481152  | 0.129990  |
| Au | -12.546346 | -0.071127 | 2.559770  |
| Au | -11.269507 | -1.407587 | -6.824151 |
| Au | -11.319114 | -2.959865 | -4.394372 |
| Au | -11.368721 | -4.512143 | -1.964593 |
| Au | -11.418329 | -6.064421 | 0.465187  |
| Au | -12.638623 | -0.397741 | -4.495721 |
| Au | -12.688230 | -1.950019 | -2.065941 |
| Au | -12.737837 | -3.502297 | 0.363838  |
| Au | -14.007739 | 0.612106  | -2.167290 |
| Au | -14.057346 | -0.940172 | 0.262489  |
| Au | -15.376854 | 1.621952  | 0.161140  |
| Au | -14.106953 | -2.492450 | 2.692269  |
| Au | -12.780507 | -2.276633 | -9.121432 |
| Au | -12.830114 | -3.828911 | -6.691653 |
| Au | -12.879721 | -5.381189 | -4.261873 |
| Au | -12.929328 | -6.933467 | -1.832093 |
| Au | -12.978935 | -8.485745 | 0.597686  |
| Au | -14.149622 | -1.266787 | -6.793001 |
| Au | -14.199229 | -2.819065 | -4.363222 |
| Au | -14.248836 | -4.371342 | -1.933443 |
| Au | -14.298444 | -5.923621 | 0.496337  |
| Au | -15.518738 | -0.256940 | -4.464571 |
| Au | -15.568345 | -1.809218 | -2.034791 |
| Au | -15.617952 | -3.361496 | 0.394988  |
| Au | -16.887854 | 0.752906  | -2.136140 |
| Au | -16.937461 | -0.799372 | 0.293639  |
| Au | -18.256969 | 1.762753  | 0.192290  |

**59\_FHI-aims\_Junction\_C1h\_diff.xyz /// -39688378.434473053 eV**

127

|    |           |           |          |
|----|-----------|-----------|----------|
| Au | -6.344060 | -2.225760 | 0.122140 |
| Au | -8.483648 | -4.019814 | 0.842826 |

|    |            |            |           |
|----|------------|------------|-----------|
| Au | -5.858261  | -4.375846  | 1.981437  |
| Au | -7.479288  | -2.125392  | 2.771110  |
| Au | -10.623237 | -5.813868  | 1.563510  |
| Au | -7.997849  | -6.169900  | 2.702122  |
| Au | -5.372461  | -6.525933  | 3.840733  |
| Au | -9.618876  | -3.919446  | 3.491795  |
| Au | -6.993488  | -4.275478  | 4.630406  |
| Au | -8.614515  | -2.025024  | 5.420079  |
| Au | -5.989127  | -2.381057  | 6.558691  |
| Au | -12.762826 | -7.607922  | 2.284196  |
| Au | -10.137437 | -7.963954  | 3.422807  |
| Au | -7.512050  | -8.319987  | 4.561418  |
| Au | -4.886662  | -8.676019  | 5.700030  |
| Au | -11.758465 | -5.713500  | 4.212480  |
| Au | -9.133077  | -6.069533  | 5.351092  |
| Au | -6.507688  | -6.425565  | 6.489703  |
| Au | -10.754103 | -3.819078  | 6.140765  |
| Au | -8.128716  | -4.175111  | 7.279376  |
| Au | -9.749743  | -1.924657  | 8.069049  |
| Au | -13.379492 | -3.463046  | 5.002154  |
| Au | -14.902414 | -9.401976  | 3.004882  |
| Au | -12.277027 | -9.758009  | 4.143493  |
| Au | -9.651638  | -10.114041 | 5.282104  |
| Au | -7.026250  | -10.470073 | 6.420716  |
| Au | -4.400863  | -10.826105 | 7.559327  |
| Au | -13.898053 | -7.507554  | 4.933166  |
| Au | -11.272665 | -7.863587  | 6.071777  |
| Au | -8.647278  | -8.219619  | 7.210388  |
| Au | -6.021889  | -8.575651  | 8.349000  |
| Au | -12.893693 | -5.613133  | 6.861450  |
| Au | -10.268304 | -5.969165  | 8.000062  |
| Au | -7.642916  | -6.325197  | 9.138673  |
| Au | -11.889331 | -3.718711  | 8.789735  |
| Au | -9.263944  | -4.074743  | 9.928346  |
| Au | -10.884970 | -1.824289  | 10.718019 |
| S  | -5.30070   | -0.78782   | -1.83399  |
| C  | 0.04504    | 1.74153    | 1.71905   |
| C  | 1.26777    | 2.04486    | 2.36111   |
| C  | 1.34226    | 2.18977    | 3.75122   |
| C  | 0.19427    | 2.02329    | 4.54060   |
| C  | -1.02015   | 1.70850    | 3.92106   |
| C  | -1.09417   | 1.56891    | 2.52518   |
| C  | 0.02570    | 1.61457    | 0.16883   |
| H  | 2.17415    | 2.16069    | 1.75898   |
| H  | 2.30320    | 2.42652    | 4.21842   |
| H  | -1.92273   | 1.56068    | 4.52203   |

|    |          |           |           |
|----|----------|-----------|-----------|
| H  | -2.05317 | 1.30932   | 2.07108   |
| C  | -1.31092 | 0.98762   | -0.32094  |
| C  | 1.22239  | 0.71117   | -0.23936  |
| C  | 0.14032  | 3.01353   | -0.50620  |
| C  | -2.48185 | 1.77836   | -0.31139  |
| C  | -1.42634 | -0.33169  | -0.79954  |
| C  | 1.45957  | -0.47923  | 0.48572   |
| C  | 2.09696  | 1.00231   | -1.30419  |
| C  | -0.12048 | 3.12571   | -1.89162  |
| C  | 0.48785  | 4.18402   | 0.19150   |
| C  | -3.71606 | 1.27956   | -0.73842  |
| H  | -2.42432 | 2.81328   | 0.03792   |
| C  | -2.64880 | -0.84119  | -1.25021  |
| H  | -0.54681 | -0.97724  | -0.84030  |
| C  | 2.50402  | -1.35028  | 0.16206   |
| H  | 0.81946  | -0.72336  | 1.33914   |
| C  | 3.14304  | 0.13859   | -1.64638  |
| H  | 1.97672  | 1.92214   | -1.88044  |
| C  | -0.01360 | 4.35316   | -2.55587  |
| H  | -0.42153 | 2.23527   | -2.45240  |
| C  | 0.58769  | 5.41834   | -0.47186  |
| H  | 0.67379  | 4.14198   | 1.26668   |
| C  | -3.80426 | -0.03712  | -1.22866  |
| H  | -4.59619 | 1.92476   | -0.69539  |
| H  | -2.70371 | -1.86902  | -1.62234  |
| C  | 3.34817  | -1.05136  | -0.92370  |
| H  | 2.65229  | -2.25034  | 0.76353   |
| H  | 3.80633  | 0.39523   | -2.47837  |
| C  | 0.34394  | 5.50988   | -1.84661  |
| H  | -0.21799 | 4.40614   | -3.62979  |
| H  | 0.85449  | 6.31273   | 0.09965   |
| H  | 0.42288  | 6.47226   | -2.36115  |
| C  | 4.45807  | -3.63531  | -0.55596  |
| H  | 5.25685  | -4.30387  | -0.90738  |
| H  | 3.47531  | -4.04973  | -0.82570  |
| H  | 4.55585  | -3.50694  | 0.53130   |
| C  | -6.51782 | 0.56742   | -1.78384  |
| H  | 0.25088  | 2.12917   | 5.62812   |
| H  | -7.45612 | 0.12563   | -2.14783  |
| H  | -6.20450 | 1.38629   | -2.44852  |
| H  | -6.66710 | 0.91713   | -0.75303  |
| S  | 4.72535  | -2.05837  | -1.43541  |
| Au | 6.822100 | -1.264710 | -0.111340 |
| Au | 8.031610 | -1.093574 | 2.500873  |
| Au | 9.675677 | -1.562808 | 0.178650  |
| Au | 8.447275 | 1.015368  | 0.578520  |

|    |           |           |           |
|----|-----------|-----------|-----------|
| Au | 9.241119  | -0.922439 | 5.113086  |
| Au | 10.885186 | -1.391672 | 2.790862  |
| Au | 12.529253 | -1.860906 | 0.468639  |
| Au | 9.656785  | 1.186503  | 3.190732  |
| Au | 11.300851 | 0.717270  | 0.868510  |
| Au | 10.072450 | 3.295446  | 1.268379  |
| Au | 11.716517 | 2.826212  | -1.053844 |
| Au | 10.450629 | -0.751303 | 7.725298  |
| Au | 12.094696 | -1.220536 | 5.403075  |
| Au | 13.738763 | -1.689770 | 3.080852  |
| Au | 15.382830 | -2.159003 | 0.758629  |
| Au | 10.866294 | 1.357639  | 5.802946  |
| Au | 12.510361 | 0.888406  | 3.480722  |
| Au | 14.154429 | 0.419172  | 1.158499  |
| Au | 11.281960 | 3.466581  | 3.880592  |
| Au | 12.926027 | 2.997348  | 1.558370  |
| Au | 11.697625 | 5.575524  | 1.958239  |
| Au | 14.570094 | 2.528115  | -0.763854 |
| Au | 11.660139 | -0.580167 | 10.337511 |
| Au | 13.304206 | -1.049401 | 8.015288  |
| Au | 14.948273 | -1.518634 | 5.693065  |
| Au | 16.592340 | -1.987867 | 3.370842  |
| Au | 18.236407 | -2.457101 | 1.048619  |
| Au | 12.075804 | 1.528775  | 8.415158  |
| Au | 13.719872 | 1.059542  | 6.092935  |
| Au | 15.363938 | 0.590308  | 3.770712  |
| Au | 17.008006 | 0.121075  | 1.448489  |
| Au | 12.491470 | 3.637717  | 6.492805  |
| Au | 14.135537 | 3.168484  | 4.170582  |
| Au | 15.779604 | 2.699250  | 1.848359  |
| Au | 12.907136 | 5.746659  | 4.570452  |
| Au | 14.551202 | 5.277426  | 2.248230  |
| Au | 13.322801 | 7.855602  | 2.648099  |

**60\_FHI-aims\_Junction\_Si2\_-2PhSMe\_diff.xyz ///** -39688378.434473053 eV

147

|    |             |             |             |
|----|-------------|-------------|-------------|
| Au | -3.06646376 | 8.55915687  | -6.77780669 |
| Au | -5.61143074 | 8.19891936  | -7.66758186 |
| Au | -5.12097700 | 9.23012732  | -5.05577014 |
| Au | -4.44174871 | 10.82392095 | -7.57607631 |
| Au | -8.17147800 | 7.91462400  | -8.58527000 |
| Au | -7.70201900 | 8.92429100  | -5.92518800 |
| Au | -7.23256000 | 9.93395900  | -3.26510500 |
| Au | -7.06235100 | 10.55115400 | -8.21865600 |

|    |             |             |             |
|----|-------------|-------------|-------------|
| Au | -6.59289200 | 11.56082100 | -5.55857500 |
| Au | -5.95322400 | 13.18768300 | -7.85204400 |
| Au | -5.48376500 | 14.19735100 | -5.19196100 |
| Au | -10.869621  | 7.607554    | -9.555624   |
| Au | -10.400163  | 8.617221    | -6.895542   |
| Au | -9.930704   | 9.626888    | -4.235460   |
| Au | -9.461245   | 10.636556   | -1.575378   |
| Au | -9.760494   | 10.244083   | -9.189011   |
| Au | -9.291036   | 11.253751   | -6.528929   |
| Au | -8.821577   | 12.263418   | -3.868847   |
| Au | -8.651368   | 12.880613   | -8.822398   |
| Au | -8.181909   | 13.890280   | -6.162316   |
| Au | -7.542241   | 15.517142   | -8.455785   |
| Au | -9.120826   | 11.870946   | -11.482480  |
| Au | -13.567765  | 7.300483    | -10.525978  |
| Au | -13.098306  | 8.310151    | -7.865897   |
| Au | -12.628847  | 9.319818    | -5.205815   |
| Au | -12.159389  | 10.329485   | -2.545732   |
| Au | -11.689930  | 11.339153   | 0.114349    |
| Au | -12.458638  | 9.937013    | -10.159366  |
| Au | -11.989179  | 10.946680   | -7.499283   |
| Au | -11.519721  | 11.956348   | -4.839202   |
| Au | -11.050262  | 12.966015   | -2.179119   |
| Au | -11.349511  | 12.573542   | -9.792753   |
| Au | -10.880052  | 13.583210   | -7.132670   |
| Au | -10.410594  | 14.592877   | -4.472588   |
| Au | -10.240384  | 15.210072   | -9.426139   |
| Au | -9.770925   | 16.219739   | -6.766057   |
| Au | -9.131257   | 17.846602   | -9.059526   |
| S  | -0.76764197 | 7.83822546  | -6.59740267 |
| Si | -0.39597374 | -1.01083817 | -0.33940609 |
| C  | -1.98376172 | -1.75587555 | 1.94481024  |
| C  | -0.46807461 | -2.53724944 | -1.46167055 |
| C  | -1.27198511 | -3.64798998 | -1.13963036 |
| H  | -1.89975509 | -3.62174099 | -0.24558865 |
| C  | -1.29365516 | -4.78504563 | -1.95380337 |
| C  | -0.51072588 | -4.83356965 | -3.11135468 |
| C  | 0.29174783  | -3.73951795 | -3.45246241 |
| H  | 0.89921757  | -3.76820647 | -4.35942868 |
| C  | 0.31038266  | -2.60444679 | -2.63617191 |
| C  | 1.23373495  | -0.37359676 | 1.96597500  |
| C  | 1.13705157  | -1.12344224 | 0.77520114  |
| C  | 2.18693792  | -2.01805581 | 0.48955382  |
| H  | 2.15457305  | -2.61796584 | -0.42275230 |
| C  | 3.26548298  | -2.17921580 | 1.36016790  |
| C  | 3.33882785  | -1.45281111 | 2.56367045  |

|   |             |             |             |
|---|-------------|-------------|-------------|
| C | 2.31057866  | -0.53048929 | 2.84025540  |
| H | 2.32563287  | 0.03013575  | 3.77706471  |
| C | -4.19582301 | -0.19648829 | 1.26245122  |
| C | -0.37217153 | 0.52646908  | -1.45082341 |
| C | 0.37597606  | 1.68090709  | -1.15157323 |
| H | 1.03005208  | 1.69349136  | -0.27620891 |
| C | 0.32030764  | 2.81525719  | -1.96418132 |
| C | -0.48862700 | 2.84250663  | -3.11657354 |
| C | -1.23492666 | 1.68923206  | -3.42465474 |
| H | -1.89206273 | 1.68717863  | -4.29658821 |
| C | -1.17479945 | 0.55899072  | -2.60996998 |
| C | -4.23671573 | -0.99585292 | 2.40875363  |
| C | -3.12682416 | -1.77580804 | 2.74972419  |
| H | -3.14959797 | -2.39834835 | 3.64641062  |
| C | -1.92448509 | -0.96163446 | 0.78071779  |
| C | -3.05145510 | -0.18080445 | 0.45867286  |
| H | -3.03489193 | 0.45669642  | -0.42843629 |
| C | 4.42792361  | -1.69486175 | 3.54005639  |
| C | 4.93143324  | -2.99286398 | 3.74270551  |
| C | 4.96518677  | -0.65399899 | 4.32528257  |
| C | 5.93522765  | -0.90314729 | 5.29213614  |
| C | 6.40245334  | -2.21274694 | 5.49421144  |
| C | 5.90912990  | -3.25706650 | 4.70302119  |
| H | 6.25906115  | -4.27985312 | 4.83413037  |
| H | 4.52568930  | -3.82377718 | 3.16405178  |
| H | 4.62580397  | 0.37093046  | 4.16948236  |
| H | 6.33311526  | -0.08144861 | 5.89017562  |
| C | 7.76127188  | -4.25327044 | 6.92661965  |
| H | 8.45352800  | -4.42032106 | 7.75988791  |
| H | 8.19773601  | -4.65688297 | 6.00684813  |
| H | 6.79335605  | -4.71769283 | 7.15173392  |
| C | -0.55667947 | 4.04233505  | -3.98444458 |
| C | -0.66177672 | 3.92089369  | -5.38319535 |
| C | -0.73941125 | 5.04227310  | -6.20967668 |
| C | -0.69933219 | 6.32370448  | -5.64534105 |
| C | -0.58999916 | 6.47003251  | -4.25299277 |
| C | -0.52534391 | 5.34184177  | -3.43942343 |
| H | -0.66103760 | 2.93004203  | -5.83949978 |
| H | -0.82063975 | 4.90355805  | -7.28709726 |
| H | -0.56229152 | 7.46595402  | -3.80752686 |
| H | -0.46846875 | 5.47193416  | -2.35786877 |
| C | -0.31465532 | 7.30788949  | -8.27817421 |
| H | -0.27056444 | 8.23107266  | -8.86745843 |
| H | -1.06557965 | 6.63991845  | -8.71196009 |
| H | 0.67375965  | 6.83367307  | -8.24974988 |
| H | 0.93808858  | 3.68134335  | -1.71848295 |

|    |             |             |             |
|----|-------------|-------------|-------------|
| H  | -1.76745301 | -0.31703391 | -2.88561513 |
| H  | 0.93286181  | -1.75359641 | -2.92638050 |
| H  | -1.92820117 | -5.63260773 | -1.68726476 |
| H  | -5.05596190 | 0.42030752  | 0.99499376  |
| H  | -1.12156469 | -2.36236129 | 2.23453938  |
| H  | 0.43245123  | 0.31683913  | 2.24184077  |
| H  | 4.06529813  | -2.87492670 | 1.09920257  |
| H  | -5.12880771 | -1.00734483 | 3.03756755  |
| H  | -0.52852565 | -5.71938762 | -3.74883207 |
| S  | 7.56009029  | -2.44905752 | 6.83774603  |
| Au | 9.74107910  | -1.62807994 | 6.18808466  |
| Au | 12.38231343 | -1.59925346 | 6.98685862  |
| Au | 11.65428337 | -2.41166859 | 4.37049800  |
| Au | 11.25288736 | 0.48214952  | 5.34173683  |
| Au | 15.03673100 | -1.43828400 | 7.72434200  |
| Au | 14.30225700 | -2.29106300 | 5.06931400  |
| Au | 13.56778200 | -3.14384200 | 2.41428600  |
| Au | 13.93096600 | 0.45863800  | 5.85489700  |
| Au | 13.19649200 | -0.39414000 | 3.19987000  |
| Au | 12.82520100 | 2.35556100  | 3.98545200  |
| Au | 12.09072600 | 1.50278200  | 1.33042400  |
| Au | 17.817966   | -1.275395   | 8.468693    |
| Au | 17.083491   | -2.128174   | 5.813665    |
| Au | 16.349017   | -2.980952   | 3.158638    |
| Au | 15.614543   | -3.833731   | 0.503610    |
| Au | 16.712200   | 0.621528    | 6.599249    |
| Au | 15.977726   | -0.231251   | 3.944221    |
| Au | 15.243252   | -1.084030   | 1.289193    |
| Au | 15.606435   | 2.518450    | 4.729804    |
| Au | 14.871961   | 1.665672    | 2.074776    |
| Au | 14.500670   | 4.415373    | 2.860359    |
| Au | 14.137487   | 0.812893    | -0.580252   |
| Au | 20.599200   | -1.112506   | 9.213045    |
| Au | 19.864726   | -1.965284   | 6.558018    |
| Au | 19.130252   | -2.818063   | 3.902990    |
| Au | 18.395777   | -3.670842   | 1.247961    |
| Au | 17.661303   | -4.523621   | -1.407066   |
| Au | 19.493435   | 0.784417    | 7.343600    |
| Au | 18.758961   | -0.068362   | 4.688572    |
| Au | 18.024486   | -0.921140   | 2.033545    |
| Au | 17.290012   | -1.773919   | -0.621483   |
| Au | 18.387670   | 2.681340    | 5.474156    |
| Au | 17.653195   | 1.828561    | 2.819128    |
| Au | 16.918721   | 0.975782    | 0.164100    |
| Au | 17.281904   | 4.578262    | 3.604711    |
| Au | 16.547430   | 3.725484    | 0.949683    |

|    |           |          |          |
|----|-----------|----------|----------|
| Au | 16.176139 | 6.475185 | 1.735266 |
|----|-----------|----------|----------|
